# Supplementary material for: Diabetes mellitus and the risk of ovarian cancer: a systematic review and meta-analysis of cohort and case–control studies
Source: PubMed Central journal article supplement — BMJ Open. 2020 Dec 29;10(12):e040137. doi: 10.1136/bmjopen-2020-040137 (PMC7778773; doi:10.1136/bmjopen-2020-040137), 2020-12-29
Supplement: bmjopen-2020-040137.draft_revisions.pdf [file bmjopen-2020-040137.draft_revisions.pdf]

# BMJ Open

BMJ Open is committed to open peer review. As part of this commitment we make the peer review history of every article we publish publicly available.

When an article is published we post the peer reviewers' comments and the authors' responses online. We also post the versions of the paper that were used during peer review. These are the versions that the peer review comments apply to.

The versions of the paper that follow are the versions that were submitted during the peer review process. They are not the versions of record or the final published versions. They should not be cited or distributed as the published version of this manuscript.

BMJ Open is an open access journal and the full, final, typeset and author-corrected version of record of the manuscript is available on our site with no access controls, subscription charges or pay-per-view fees (<http://bmjopen.bmj.com>).

If you have any questions on BMJ Open's open peer review process please email [info.bmjopen@bmj.com](mailto:info.bmjopen@bmj.com)

# BMJ Open

## Diabetes mellitus and the risk of ovarian cancer – a systematic review and meta-analysis of cohort and case-control studies

|                               |                                                                                                                                                                                                                                                                                                                             |
|-------------------------------|-----------------------------------------------------------------------------------------------------------------------------------------------------------------------------------------------------------------------------------------------------------------------------------------------------------------------------|
| Journal:                      | <i>BMJ Open</i>                                                                                                                                                                                                                                                                                                             |
| Manuscript ID                 | bmjopen-2020-040137                                                                                                                                                                                                                                                                                                         |
| Article Type:                 | Original research                                                                                                                                                                                                                                                                                                           |
| Date Submitted by the Author: | 06-May-2020                                                                                                                                                                                                                                                                                                                 |
| Complete List of Authors:     | Wang, Li; Huzhou Central Hospital, Obstetrics and Gynecology<br>Zhong, Lei; Huzhou Central Hospital, Intensive Care Unit<br>Xu, Bin; Huzhou Central Hospital, Obstetrics and Gynecology<br>Chen, Min; Huzhou Central Hospital, Obstetrics and Gynecology<br>Huang, Hong; Huzhou Central Hospital, Obstetrics and Gynecology |
| Keywords:                     | Diabetes & endocrinology < INTERNAL MEDICINE, Gynaecological oncology < GYNAECOLOGY, Adult oncology < ONCOLOGY                                                                                                                                                                                                              |
|                               |                                                                                                                                                                                                                                                                                                                             |

SCHOLARONE™  
Manuscripts

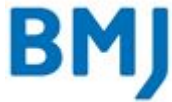

I, the Submitting Author has the right to grant and does grant on behalf of all authors of the Work (as defined in the below author licence), an exclusive licence and/or a non-exclusive licence for contributions from authors who are: i) UK Crown employees; ii) where BMJ has agreed a CC-BY licence shall apply, and/or iii) in accordance with the terms applicable for US Federal Government officers or employees acting as part of their official duties; on a worldwide, perpetual, irrevocable, royalty-free basis to BMJ Publishing Group Ltd ("BMJ") its licensees and where the relevant Journal is co-owned by BMJ to the co-owners of the Journal, to publish the Work in this journal and any other BMJ products and to exploit all rights, as set out in our [licence](#).

The Submitting Author accepts and understands that any supply made under these terms is made by BMJ to the Submitting Author unless you are acting as an employee on behalf of your employer or a postgraduate student of an affiliated institution which is paying any applicable article publishing charge ("APC") for Open Access articles. Where the Submitting Author wishes to make the Work available on an Open Access basis (and intends to pay the relevant APC), the terms of reuse of such Open Access shall be governed by a Creative Commons licence – details of these licences and which [Creative Commons](#) licence will apply to this Work are set out in our licence referred to above.

Other than as permitted in any relevant BMJ Author's Self Archiving Policies, I confirm this Work has not been accepted for publication elsewhere, is not being considered for publication elsewhere and does not duplicate material already published. I confirm all authors consent to publication of this Work and authorise the granting of this licence.

1  
2  
3 **Diabetes mellitus and the risk of ovarian cancer**  
4 **– a systematic review and meta-analysis of cohort and case-control studies**  
5  
6

7 Lihai Wang MM<sup>1</sup>, Lei Zhong MM<sup>2</sup>,  
8 Bin Xu MM<sup>1</sup>, Min Chen BN<sup>1</sup>, Hongxiao Huang MM<sup>1</sup>  
9  
10

11  
12 **Corresponding author:**

13 Hongxiao Huang, M.M.

14 Department of Obstetrics and Gynecology, Huzhou Cent Hosp, Affiliated Cent Hosp  
15 HuZhou University, 198 Hongqi Rd, Huzhou 313000, Zhejiang, Peoples R China.

16 Phone: 13957256957

17 Email: perfectog@163.com;  
18  
19  
20  
21  
22

23 **Lihai Wang:** Department of Obstetrics and Gynecology, Huzhou Cent Hosp,  
24 Affiliated Cent Hosp HuZhou University, Huzhou 313000, Zhejiang, Peoples R China.  
25 whloggroup@163.com;

26 **Lei Zhong:** Department of Intensive Care Unit, Huzhou Cent Hosp, Affiliated Cent  
27 Hosp HuZhou University, Huzhou 313000, Zhejiang, Peoples R China.  
28 [perfecticu@163.com](mailto:perfecticu@163.com);

29 **Bin Xu:** Department of Obstetrics and Gynecology, Huzhou Cent Hosp, Affiliated  
30 Cent Hosp HuZhou University, Huzhou 313000, Zhejiang, Peoples R China;  
31 xb-flower@yeah.net;

32 **Min Chen:** Department of Obstetrics and Gynecology, Huzhou Cent Hosp, Affiliated  
33 Cent Hosp HuZhou University, Huzhou 313000, Zhejiang, Peoples R China;  
34 [2645538450@qq.com](mailto:2645538450@qq.com).  
35  
36  
37  
38  
39  
40

41 **ABSTRACT**

42 **Objective** Emerging evidence from observational studies (cohort and case-control  
43 studies) suggests that a history of diabetes mellitus (DM) has been linked to increased  
44 risk of ovarian cancer (OC), but the association between them remains inconclusive.  
45 The aim of this systematic review and meta-analysis of observational studies was to  
46 clarify this association.  
47  
48

49 **Design** Systematic review and meta- analysis.

50 **Methods** We searched PubMed, Embase and the Cochrane library databases  
51 published from the inception through 9 April 2020 without language restriction.  
52 Observational studies that evaluated the correlation between DM and the incidence of  
53 OC in women were included in our study. Relative risk (RR) with 95% confidence  
54 interval (CI) were pooled by use of a random-effects model.  
55

56 **Results** A total of 36 epidemiological articles, including 9 case-control and 27  
57 cohort studies, were finally enrolled, consisting of 14,496 incident cases of OC.  
58 Synthesized RR of developing OC by history of DM was 1.20 (1.10,1.31) for all  
59  
60

1  
2  
3 eligible studies, 1.08 (0.77,1.53) for case-control studies and 1.22 (1.11,1.33) for  
4 cohort studies. The above-mentioned positive association persisted across most of  
5 subgroup analyses, whereas was not significant among studies from North America  
6 and Europe countries, level of unadjusted, low-quality study and gestational DM  
7 patients. The cumulative meta-analysis and sensitivity analysis showed pooled effect  
8 was stable and reliable, and no apparent publication bias was identified in this study.  
9

10  
11 **Conclusions** Our study found weaker but still significant association between DM  
12 and OC risk. However, further well-designed prospective studies that control for  
13 potential confounders and confirm the association with subtypes of OC are warranted.  
14

#### 15 16 **Strengths and limitations of this study**

17 ▶ Largest systematic review and meta-analysis examining diabetes mellitus (DM) and  
18 the risk of ovarian cancer (OC).  
19

20 ▶ We also investigated the link between type 1 DM, type 2 DM or GDM and OC risk,  
21 respectively, which might be more generalizable than previous published  
22 meta-analyses.  
23

24 ▶ The sensitivity analysis and cumulative meta-analysis showed pooled effect was  
25 stable and reliable, and no apparent publication bias was identified in our study.  
26

27 ▶ Substantial heterogeneity was observed among these studies.

28 ▶ No data on the histologic subtypes of OC.  
29  
30  
31  
32  
33  
34  
35  
36  
37  
38  
39  
40  
41  
42  
43  
44  
45  
46  
47  
48  
49  
50  
51  
52  
53  
54  
55  
56  
57  
58  
59  
60

## INTRODUCTION

Diabetes mellitus (DM), characterized as hyperglycemia, is a rock-ribbed and costly chronic ailment metabolic disease,<sup>1</sup> dividing into four different subtypes—type 1 DM (T1DM), type 2 DM (T2DM), gestational diabetes mellitus (GDM) and other specific categories of diabetes.<sup>2</sup> The International Diabetes Federation report of 2017 has estimated that the number of DM will reach approximately 693 million (9.9%) by 2045, up over 1.5-fold from 451 million (8.4%) in 2017 among adults aged 18–99 years in worldwide.<sup>3</sup> That is, the number of DM will continue to rise due to population ageing and rising obesity, recognized as a global public health issue challenge of the 21st century across the world.<sup>4,5</sup>

Ovarian cancer (OC), as a leading cause of death in women with gynecological malignancy, is the fifth leading cause of carcinoma-related death in women, with a 5-year survival rate varying from 30 to 40%.<sup>6,7</sup> The Global Cancer Observatory predicts that in 2018 there are 295,414 people with OC and the incidence of this disease in the worldwide increased by 47% in 2040 estimates (434,184).<sup>8</sup> In the last 30 years, the cure rate for OC has barely budged.<sup>9</sup>

Too well known, the ovary disease, located deep in the pelvic cavity, lacks early identifiable clinical symptoms, specific laboratory indicators as well as effective screening strategies, making early lesions are difficult to detect.<sup>10</sup> Therefore, the majority of patients are already diagnosed in an advanced stage owing to the insidious onset of OC.<sup>11,12</sup> Early identification and intervention is of vital significance in controlling cancer, especially for OC, unfortunately, few modifiable risk factors for this cancer are well documented such as smoking, hormonal replacement therapy and dietary factors etc.<sup>13,14</sup>

In recent years, the causal relationship between DM and cancer risk has been widely concerned in cancer prevention research. Accumulating lines of evidence have demonstrated that DM are associated with greater risk of certain types of cancer at multiple sites, such as pancreatic, liver, endometrium cancer, etc.<sup>15-20</sup> Nonetheless, the relationship between DM and the observed excess risk of cancer may be a result of confounding factors such as age, obesity, physical activity, exogenous insulin therapy, etc.<sup>15,21,22</sup>

In recent decades, there are several epidemiological observational studies in this area since the first study investigating the association between DM and subsequent risk of OC in women was published. Several cohort studies<sup>23-26</sup> and case-control<sup>27</sup> have been reported that a history of DM is significantly associated with an augmented risk of OC, however, other relevant studies found a negative significant association.<sup>28-31</sup> Because obesity or high BMI has been regarded as a risk factor for both DM and OC, it remains unclear as to whether or not DM is associated with an increased OC risk on account of confounding by this factor. Studies in recent years have shown that DM may be closely related to OC, but epidemiological findings between them are remains open to discussion or absent.

In view of these conflicting results, we decided to update a meta-analysis of case-control and cohort studies to clarify whether there is an association between DM and OC risk in women.

## METHODS

This meta-analysis was performed and reported based on the Meta-analysis of Observational Studies in Epidemiology (MOOSE) protocol checklist<sup>32</sup> and preferred reporting items for systematic reviews and meta-analyses (PRISMA) guidelines<sup>33</sup> (Additional file 1).

### Search Strategy and Selection Criteria

Online databases, such as PubMed, Embase and the Cochrane library databases, were searched from the inception to 9 April 2020, without language restriction, for observational studies (cohort and case-control studies) which investigated the association between DM and the risk of OC in women. The MeSH keywords were as follows: “diabetes mellitus”, “diabetes mellitus, type 1”, “diabetes mellitus, type 2”, “diabetes, gestational”, “ovarian neoplasms”, “ovarian cancer”, “cohort studies”, “case-control studies”, etc. A comprehensive search strategy was provided in the additional file 2. In addition, we searched the potentially eligible bibliographies of relevant articles for the purpose of completeness. The exclusion criteria in this meta-analysis were: randomized controlled trial, case reports, letters, reviews or animals studies. Eligibility assessment was performed by two authors (WHL and ZL).

### Data extraction

Data were extracted by one author (WHL), and then checked by a second investigator (ZL). The main extracted information are described in Table 1 and 2. The association between DM and OC was the primary outcome of interest of our study.

### Assessment of Study Quality

The Newcastle-Ottawa Scale (NOS) score was employed to evaluate the study quality of observational studies (cohort and case-control studies), with a maximum score of 9, of which 0 to 3, 4 to 6, 7 to 9 score were considered as low, fair, and high quality, respectively.<sup>34</sup>

### Assessment of risk of bias

All selected literatures were subjected to a sensitivity analysis to explore the robustness of the pooled effects. The publication bias was also appraised using the funnel plot, Begg’s and Egger’s Test.<sup>35</sup>

### Statistical analysis

The effect estimates of original studies were 5 measures of association, including relative risk (RR), standardized incidence ratio (SIR), incidence rate ratio (IRR), hazard ratio (HR) and odds ratio (OR). Given that the frequency of OC is relatively low, the latter four measures were considered to yield approximately equal estimates to that of the RR. Therefore, we reported all pooled results as RR with 95% confidence interval (CI).<sup>36</sup>

The statistical heterogeneity was measured by  $\chi^2$  (threshold  $p=0.10$ ) and

1  
2  
3 quantified by the  $I^2$  statistic. We prefer to choose the random-effects model to analyze  
4 all data due to the conservativeness of the analyze results.<sup>37</sup>The statistical analysis  
5 were performed with the Stata 12.0 software (StataCorp, College Station, TX, USA).  
6 All statistical analyses were two-sided with an  $\alpha$  level of 0.05.  
7

8 Prespecified subgroup analyses were carried out to identify the sources of  
9 heterogeneity between studies in accordance with the study design (case-control vs.  
10 cohort studies), DM types (type 1 DM vs. type 2 DM vs. GDM), duration of  
11 follow-up (<10 year vs.  $\geq 10$  year), level of adjustment (unadjusted vs. adjusted and  
12 BMI-adjusted vs. BMI-unadjusted), study quality (NOS  $\geq 7$  vs. <7 points) and  
13 geographic areas (North America vs. Europe vs. Asian vs. Oceania). Subsequently, a  
14 cumulative meta-analysis for the association between DM and the risk of OC was  
15 performed to detect the accumulated effects of DM on OC risk based on the  
16 publication year.  
17  
18  
19  
20

## 21 **Results**

### 22 **Search results and study characteristics**

23 The details on the study-selection procedure are shown in Figure 1. As of 9 April  
24 2020, our search strategy initially identified 543 records and 36 citations met criteria  
25 for final inclusion after screening. These 36 publications published between 1985 and  
26 2020, which included 9 case-control and 27 cohort studies, were eligible for final  
27 analysis, with 14,496 incident cases of OC in this meta-analysis.  
28  
29

30 Among these included studies, 6 studies evaluated the relation between type 1  
31 DM and risk of OC, 28 studies investigated the relationship between type 2 DM and  
32 OC risk, and the remaining 4 studies assessed this association between GDM and OC  
33 risk as well. With regard to geographic location, 1 studies originated from Oceania, 1  
34 in Europe and Oceania, 6 in North America, 14 in Europe, and 14 studies from Asia.  
35 The follow-up period of cohort studies varied, ranging from 3.5 years to 18.01 years.  
36 Studies were heterogeneous regarding age, ranging from 12.3 to 89 years. The  
37 case-control studies comprised 3946 OC cases and 46,471 controls.  
38  
39

40 The main characteristics of included studies are given in Table 1 and Table 2.  
41  
42  
43  
44  
45  
46  
47  
48  
49  
50  
51  
52  
53  
54  
55  
56  
57  
58  
59  
60



**Table 1** Baseline characteristics of the cohort studies

| Study ID                                 | Country or region | Study period | Follow-Up Duration, y | Population | age (years) | No. of Subjects | No. of OC Cases | Population setting | NOS score |
|------------------------------------------|-------------------|--------------|-----------------------|------------|-------------|-----------------|-----------------|--------------------|-----------|
| Weiderpass 2002 <sup>38</sup>            | Sweden            | 1965–1994    | 5.7                   | Type 2 DM  | 66.4        | 141,627         | 337             | PBR                | 8         |
| Zendehdel 2003 <sup>39</sup>             | Sweden            | 1965–1999    | 15.0                  | Type 1 DM  | 17.3        | 14,323          | 9               | PBR                | 7         |
| Swerdlow 2005 <sup>a</sup> <sup>40</sup> | UK                | 1972–2003    | 18.0                  | Type 1 DM  | <30         | 11,047          | 16              | PBR                | 7         |
| Swerdlow 2005 <sup>b</sup> <sup>40</sup> | UK                | 1972–2003    | 18.01                 | Type 2 DM  | 30–49       | 2122            | 6               | PBR                | 7         |
| Inoue 2006 <sup>41</sup>                 | Japan             | 1990–2003    | 10.7                  | Type 2 DM  | 51.8        | 51,223          | 74              | PBR                | 8         |
| Khan 2006 <sup>42</sup>                  | Japan             | 1988–1997    | 7.6                   | Type 2 DM  | 40–79       | 33503           | 29              | PBR and HBR        | 7         |
| Hemminki 2010 <sup>43</sup>              | Sweden            | 1964–2007    | 15                    | Type 2 DM  | 39–75       | 24,827          | 192             | PBR and HBR        | 7         |
| Chodick 2010 <sup>44</sup>               | Israel            | 2000–2008    | 8                     | Type 2 DM  | 62          | 47,682          | 88              | PBR                | 7         |
| Shu 2010 <sup>45</sup>                   | Sweden            | 1964–2006    | 17                    | Type 1 DM  | 12.3        | 11,290          | 9               | PBR and HBR        | 8         |
| Wotton 2011 <sup>a</sup> <sup>46</sup>   | Southern England  | 1963–1998    | ...                   | Type 2 DM  | >30         | 132271          | 37              | PBR and HBR        | 7         |
| Wotton 2011 <sup>b</sup> <sup>46</sup>   | southern England  | 1999–2008    | ...                   | Type 2 DM  | >30         | 90427           | 8               | PBR and HBR        | 7         |
| Johnson 2011 <sup>47</sup>               | Canada            | 1994–2006    | 4.35                  | Type 2 DM  | 60.7        | 169,012         | 295             | PBR                | 7         |
| Lambe 2011 <sup>48</sup>                 | Sweden            | 1985–1996    | 11.7                  | Type 2 DM  | 46.6        | 230,737         | 536             | PBR                | 8         |
| Gapstur 2012 <sup>31</sup>               | USA               | 1992–2007    | ...                   | Type 2 DM  | 62.28       | 63,440          | 524             | PBR                | 7         |
| Lo 2013 <sup>49</sup>                    | Taiwan            | 1996–2009    | 3.5                   | Type 2 DM  | 60.45       | 912,447         | 948             | PBR                | 7         |
| Chen 2014 <sup>30</sup>                  | Taiwan            | 2000–2008    | >9                    | Type 2 DM  | 61.09       | 638,618         | 935             | PBR                | 9         |
| Hsu 2015 <sup>50</sup>                   | Taiwan            | 2000–2008    | 6.16                  | Type 1 DM  | 49.2        | 7752            | 7               | PBR                | 7         |
| Harding 2015 <sup>25</sup>               | Australia         | 1997–2008    | 12.0                  | Type 1 DM  | 27.4        | 38,644          | 38              | PBR                | 7         |
| Harding 2015 <sup>25</sup>               | Australia         | 1997–2008    | 5.8                   | Type 2 DM  | 60.4        | 408426          | 792             | PBR                | 7         |

|                                            |                 |           |      |           |       |           |       |      |   |
|--------------------------------------------|-----------------|-----------|------|-----------|-------|-----------|-------|------|---|
| Dankner 2016 <sup>24</sup>                 | Israel          | 2002-2012 | 11   | Type 2 DM | 46.63 | 1,152,122 | 1,495 | PBR  | 8 |
| Carstensen 2016 <sup>21</sup>              | Multi-countries | 1972-2014 | ...  | Type 1 DM | <40   | ...       | 252   | PBR  | 7 |
| Fuchs 2017 <sup>23</sup>                   | Israel          | 1988-2013 | 12   | GDM       | 28.45 | 104,715   | 56    | PB   | 7 |
| Ballotari 2017 <sup>26</sup>               | Italy           | 2010-2013 | 4    | Type 2 DM | 47    | 195,930   | 160   | PBR  | 6 |
| Han 2018 <sup>28</sup>                     | Korean          | 2002-2015 | 10   | GDM       | 27.33 | 102,900   | 1,148 | PB   | 8 |
| He 2018 <sup>29</sup>                      | China           | 2003-2014 | ...  | Type 2 DM | 63.7  | 14,193    | 24    | PB   | 7 |
| Bao 2018 <sup>51</sup>                     | Swedish         | 1998-2014 | ...  | Type 2 DM | 62.57 | 25,154    | 57    | Twin | 6 |
| Saarela 2019 <sup>52</sup>                 | Finland         | 1988-2014 | 10.5 | Type 2 DM | ...   | 223,602   | 977   | PBR  | 6 |
| Linkeviciute-Ulinskiene 2019 <sup>15</sup> | Lithuania       | 2000-2012 | 6.8  | Type 2 DM | 64.0  | 78,823    | 249   | PBR  | 7 |
| Peng 2019 <sup>53</sup>                    | Taiwan          | 2000-2013 | 6.84 | GDM       | 28.97 | 990,572   | 1196  | PB   | 7 |
| Pace 2020 <sup>54</sup>                    | Canada          | 1990-2007 | 13.1 | GDM       | ...   | 68,588    | 56    | PB   | 7 |

T1DM type 1 diabetes mellitus, T2DM type 2 DM, GDM gestational DM, HB hospital-based, HB hospital-based registry, PBR population-based registry. PB population-based

1  
2  
3  
4  
5  
6  
7  
8  
9  
10  
11  
12  
13  
14  
15  
16  
17  
18  
19  
20  
21  
22  
23  
24  
25  
26  
27  
28  
29  
30  
31  
32  
33  
34  
35  
36  
37  
38  
39  
40  
41  
42  
43  
44  
45  
46

**Table 2** Baseline characteristics of the case-control studies

| <b>Study ID</b>              | <b>Country or region</b> | <b>Study period</b> | <b>Population</b> | <b>age (years)</b> | <b>No. Cases/ Controls</b> | <b>Population setting</b> | <b>NOS score</b> |
|------------------------------|--------------------------|---------------------|-------------------|--------------------|----------------------------|---------------------------|------------------|
| O'Mara 1985 <sup>55</sup>    | USA                      | 1957-1965           | Type 2 DM         | 30-89              | 328/2,342                  | HB                        | 5                |
| Adler 1996 <sup>56</sup>     | USA                      | 1975-1987           | Type 2 DM         | 51.98              | 595/1,587                  | PBR                       | 5                |
| Parazzini 1997 <sup>57</sup> | Italy                    | 1983-1991           | Type 2 DM         | 52.52              | 971/2,758                  | HB                        | 5                |
| Mori 1998 <sup>58</sup>      | Japan                    | 1994-1996           | Type 2 DM         | 54.24              | 89/323                     | PB                        | 7                |
| Kuriki 2007 <sup>59</sup>    | Japan                    | 1988-2000           | Type 2 DM         | 57.57              | 218/33,569                 | PBR and HBR               | 6                |
| Reis 2010 <sup>27</sup>      | Turkey                   | 2002-2003           | Type 2 DM         | 51.0               | 217/1,050                  | HB                        | 6                |
| Attner 2012 <sup>60</sup>    | Sweden                   | 1998-2007           | Type 2 DM         | ...                | 289/2,207                  | PBR                       | 7                |
| Bosetti 2012 <sup>61</sup>   | Italy                    | 1991-2009           | Type 2 DM         | 56.70              | 1,031/2,411                | HB                        | 5                |
| Ruiz 2016 <sup>62</sup>      | USA                      | 2003-2008           | Type 2 DM         | 57.5               | 208/224                    | HB                        | 5                |

T1DM type 1 diabetes mellitus, T2DM type 2 DM, GDM gestational DM, HB hospital-based, HB hospital-based registry, PBR population-based registry. PB population-based

### Assessment of Study Quality

The NOS quality stars ranged between 5 and 9, and the average score was 6.3 for case-control and 7.19 for cohort studies (Additional file 3). Two (22.22%) case-control and twenty-four (88.89%) cohort studies were regarded as high-quality (NOS  $\geq$  7 points).

### Assessment of reporting biases

The sensitivity analysis suggested no single study had significant influence on the summarized RR, which revealed the stability of pooled estimate (Additional file 4).

No obvious evidence of publication bias was detected by inspection of the funnel plot and statistical tests (Begg test,  $P=0.246$ ; Egger test,  $P=0.132$ ; Additional file 4).

### Synthesis of primary outcome

All 36 studies reported the association between DM and OC risk, and the combined RR was 1.20 (95% CI = 1.10 to 1.31;  $P=0.000$ ), with substantial statistical heterogeneity among these studies ( $X^2=152.43$ ,  $P=0.000$ ;  $I^2=75.1\%$ ; Figure 2).

### The results of subgroup analysis

When stratified by study design subtypes, a statistically significant effect of DM on OC risk was observed in cohort studies (RR, 1.22; 95% CI = 1.11 to 1.33;  $P=0.00$ ), however, the case-control studies found no relationship between DM and the incidence of OC in spite of a positive trend (RR, 1.08; 95% CI = 0.77 to 1.53;  $P=0.659$ ). In the analysis stratified according to DM types, a positive significant association was noted in both type 1 DM (RR, 1.44; 95% CI = 1.06 to 1.95;  $P=0.019$ ) and type 2 DM group (RR, 1.17; 95% CI = 1.06 to 1.30;  $P=0.002$ ), but not in GDM group (RR, 1.14; 95% CI = 0.90 to 1.43;  $P=0.277$ ).

A subgroup analysis was conducted considering the level of adjustment, the summary RR in adjusted studies (RR, 1.23; 95% CI = 1.10 to 1.37;  $P=0.000$ ) was more marked than in unadjusted studies (RR, 1.13; 95% CI = 0.98 to 1.31;  $P=0.083$ ). Both BMI-adjusted (RR, 1.37; 95% CI = 1.16 to 1.62;  $P=0.00$ ) and BMI-unadjusted (RR, 1.12; 95% CI = 1.03 to 1.22;  $P=0.008$ ) analyses were associated with an augmented risk of OC. In further analysis by the length of follow-up, women who experienced a long period of follow-up i.e.  $\geq 10$  years (RR, 1.33; 95% CI = 1.09 to 1.63;  $P=0.005$ ) were more likely to have a higher risk of OC than those who had less than 10 years (RR, 1.14; 95% CI = 1.01 to 1.29;  $P=0.030$ ).

Subgroup analysis by continent, DM was significantly positively correlated with increased the OC risk among studies conducted in Asia (RR, 1.43; 95% CI = 1.20 to 1.71;  $P=0.00$ ) and Oceania (RR, 1.24; 95% CI = 1.16 to 1.32;  $P=0.000$ ) except for Europe (RR, 1.15; 95% CI = 0.99 to 1.35;  $P=0.064$ ) and North America (RR, 0.94; 95% CI = 0.73 to 1.21;  $P=0.635$ ) studies. The RR was 1.24 (95% CI = 1.12 to 1.36;  $P=0.00$ ) for high study quality studies with significant difference and 1.07 (95% CI = 0.85 to 1.35;  $P=0.557$ ) for non-high study quality studies without statistical

significance (Additional file 4).

The results of subgroup analyses are shown in Table 3.

**Table 3 Summary risk estimates of the subgroup analysis results of DM and OC risk**

| Subgroup            | Studies, n | RR (95% CI)      | <i>I</i> <sup>2</sup> (%) | <i>P</i> |
|---------------------|------------|------------------|---------------------------|----------|
| Total               | 36         | 1.20 (1.10,1.31) | 75.1                      | 0.000    |
| Study design        |            |                  |                           |          |
| Case-control        | 9          | 1.08 (0.77,1.53) | 71.1                      | 0.001    |
| Cohort              | 27         | 1.22 (1.11,1.33) | 76.7                      | 0.000    |
| DM types            |            |                  |                           |          |
| type 1 DM           | 6          | 1.44 (1.06,1.95) | 67.2                      | 0.009    |
| type 2 DM           | 28         | 1.17 (1.06,1.30) | 78.5                      | 0.000    |
| GDM                 | 4          | 1.14 (0.90,1.43) | 31.5                      | 0.224    |
| Geographic location |            |                  |                           |          |
| North America       | 6          | 0.94 (0.73,1.21) | 53.9                      | 0.054    |
| Europe              | 14         | 1.15 (0.99,1.35) | 81.3                      | 0.000    |
| Asian               | 14         | 1.43 (1.20,1.71) | 69.5                      | 0.000    |
| Oceania             | 1          | 1.24 (1.16,1.32) | 0.00                      | 0.486    |
| Follow-up           |            |                  |                           |          |
| <10 year            | 11         | 1.14 (1.01,1.29) | 77                        | 0.000    |
| ≥10 year            | 12         | 1.33 (1.09,1.63) | 84.8                      | 0.000    |
| Level of adjustment |            |                  |                           |          |
| No                  | 8          | 1.13(0.98,1.31)  | 85                        | 0.000    |
| Yes                 | 28         | 1.23 (1.10,1.37) | 63.9                      | 0.000    |
| BMI                 |            |                  |                           |          |
| Yes                 | 13         | 1.37 (1.16,1.62) | 53.5                      | 0.011    |
| No                  | 23         | 1.12 (1.03,1.22) | 69.9                      | 0.000    |
| Study quality       |            |                  |                           |          |
| NOS <7              | 10         | 1.07 (0.85,1.35) | 66.7                      | 0.001    |
| NOS ≥7              | 26         | 1.24 (1.12,1.36) | 74.2                      | 0.000    |

RR relative risk, CI confidence interval, NOS Newcastle–Ottawa Quality Assessment Scale, BMI body mass index, *P* for heterogeneity within each subgroup.

### Cumulative meta-analysis

Although there is no association between DM and the risk of OC before Shu 2010<sup>45</sup> (cumulative RR, 1.32; 95% CI= 1.00 to 1.74), subsequent studies after this study show a consistently positive association (cumulative RR, 1.32; 95% CI = 1.01 to 1.71; Figure 3).

## DISCUSSION

1  
2  
3 Our systematic review and meta-analysis of 27 cohort and 9 case-control studies  
4 evaluated the association between DM and the incidence of OC and suggests that  
5 women with DM had a 20% elevated risk of OC, as compared to those without history  
6 of DM. Similar positive finding was observed when we analyzed by cohort studies,  
7 however, no meaningful difference was noted when pooled by the case-control studies.  
8 Since the inherent nature of recall and select bias in case-control study, certain biases  
9 might lead to inaccurate reporting of causal relationship.<sup>63</sup>

10  
11  
12 A subgroup meta-analysis based on DM types indicated that the risk of OC in  
13 type 1 DM group (44%) is higher than in type 2 DM group (17%), while no  
14 significant association is found in GDM group. That may explain the excess risk in  
15 type 1 DM populations that, persons with type 1 DM usually require exogenous  
16 insulin treatment for the purpose of regulating blood glucose level,<sup>64</sup> and those who  
17 treated with insulin appear to be at higher risk to develop cancer.<sup>65</sup> On the other hand,  
18 due to the limited numbers of eligible studies and sample sizes, the result obtained  
19 from GDM group should be interpreted with caution. In addition, owing to an  
20 increase risk of cancer with age, the length of follow-up for GDM patients might be  
21 too short to detect cancers in young women.<sup>66</sup>

22  
23  
24  
25  
26 The positive link was even more prominent arresting in studies that adjusted for  
27 covariates (ie, age, obesity, hypertension, reproductive history, smoking or alcohol,  
28 etc.) than these for unadjusted covariates analysis. Similarly, compared to subjects  
29 without BMI-adjusted, the significant relationship between DM and OC also still  
30 existed and became stronger in BMI-adjustment studies. These two suggest DM is a  
31 potential independent risk factor for the development of OC.

32  
33  
34 In keeping with finding, women with DM had less risk of OC during the early  
35 follow-up period (<10 years) than during the late follow-up duration ( $\geq 10$  years).  
36 Owing that OC occurs mostly in middle and elderly women, therefore, women who  
37 enjoyed a long-term follow up are more susceptible to OC compared to those who had  
38 a short follow-up period.<sup>26</sup> Subgroup analysis on geographic areas, the Asian and  
39 Oceania studies yielded similar positive results as the aforementioned analyses apart  
40 from Europe and North America studies, which is consistent with a previous  
41 meta-analysis described by Zhang.<sup>67</sup> Geographic variation in the incidence of OC in  
42 women worldwide might explain such heterogeneity. The significant association was  
43 consistent in high study studies (NOS  $\geq 7$  points) except for non-high quality studies  
44 (NOS <7 points).

45  
46  
47 To our knowledge, only three previous meta-analyses were published in this field.  
48 In 2013, Lee et al.<sup>68</sup> performed a first meta-analysis with 7 case-control and 11 cohort  
49 studies and supported that DM patients have a 17% increased risk of OC, compared  
50 with non-DM patients. A subsequent meta-analysis carried out by Wang et al. in 2017  
51 with 14 cohort studies exposed that DM is associated with a 19% raised risk of OC,<sup>69</sup>  
52 which was further confirmed by a meta-analysis with 15 cohort studies (32%) later  
53 the same year.<sup>67</sup> Our results, in accordance with these relevant studies, suggest that  
54 DM is correlated with a 20% increased risk of OC, and a significant positive  
55 association between them was observed in cohort studies (22%) but not in  
56 case-control studies (8%). Furthermore, the result of cumulative meta-analysis  
57  
58  
59  
60

1  
2  
3 showed that it is not until in Shu 2010<sup>45</sup> that aforementioned positive result first  
4 appeared and the association tended to be stable thereafter.

5  
6 The underlying carcinogenesis effect of DM to ovary was not completely  
7 uncovered at present, but several plausible mechanisms have been postulated to  
8 explain the links between them. Previous studies have shown that the neoplastic  
9 process has been considered to influenced by DM through these mechanisms, mainly  
10 including hyperglycemia, hyperinsulinemia and chronic inflammation.<sup>70,71</sup> Because of  
11 a prolonged exposure to inflammation and hyperglycemic condition, the reiterant  
12 lesion and repair cycles which is associated with incessant ovulation process could be  
13 slow down, thus, resulting in an underlying risk of OC.<sup>72</sup> Moreover, previous research  
14 confirmed that higher concentration of glucose is associated with an elevated  
15 expression level of vascular endothelial growth factor, and the latter has been know as  
16 a potent proangiogenic factor,<sup>73</sup> indicating a tumor-promotion effect of DM.  
17 Biologically, an excess of insulin, as a growth factor, may stimulate the growth of  
18 tumor, whether for endogenous or exogenous<sup>74</sup>. Besides, several oral  
19 anti-hyperglycemic therapies have been shown to increase risk of cancer development.  
20  
21  
22  
23  
24  
25  
26  
27  
28  
29  
30  
31  
32  
33  
34  
35  
36  
37  
38  
39  
75

40  
41  
42  
43  
44  
45  
46  
47  
48  
49  
50  
51  
52  
53  
54  
55  
56  
57  
58  
59  
60  
Various strengths of our meta-analysis should be mentioned. First, this update  
study included a comprehensive search strategy, a great number of participants, a  
detailed subgroup, and sensitivity analysis, which provided a more reliable estimate of  
the association between DM and OC risk. Second, we investigated the link between  
type 1 DM, type 2 DM or GDM and the risk of OC, respectively, which might be  
more generalizable than previous three meta-analyses. Third, most of included  
observational studies has controlled at least one potential confounder, such as age,  
BMI, obesity, drinking and smoking habits, as well as regular physical exercise, etc.  
suggesting the reliability of the outcomes. Finally, in a cumulative meta-analysis by  
publication date, the 95% CIs became progressively narrower as the number of  
sample size increases, indicating increasing the estimation accuracy of risk estimates.

However, the present study has several limitations. First, the aggregated data of  
our study were originated from observational studies, thus, the causality between DM  
and the prevalence of OC remains speculative. Second, there are variety of histologic  
subtypes in OC with distinct clinical characteristics, thus, the relation between DM  
and the different of OC subtypes risk is being explored in the future. Third, the  
heterogeneity among the individual studies was substantial, so does in subgroup  
analysis. Finally, Although the majority of eligible studies adjusted for many potential  
confounders, we could not determine the influence of other various factors such as  
different treatment modalities of DM, oral contraceptive use, hormone replacement  
therapy, etc.

## CONCLUSIONS

Accumulated evidence from cohort and case-control studies suggested that women  
with history of DM have a higher risk of OC than those who without, despite  
significant heterogeneity among individual studies. However, further high-quality  
studies with prospective design that are adequately controlled for potential

1  
2  
3 confounding factors and verified the association with subtypes of OC should be  
4 conducted to identify our results.  
5  
6

7 **Acknowledgements** The authors would like to thank all the anonymous reviewers  
8 for their valuable comments and suggestions on improving quality of this study.  
9

10  
11 **Contributors** HXH, WHL and ZL conceived the study idea and designed the study.  
12 WHL and ZL collected literatures, reviewed the articles, collected the data and  
13 performed all data analyses. W-HL, ZL, HXH, XB and CM were responsible for  
14 drafting of the manuscript. All the authors approved the final version of this  
15 manuscript.  
16  
17

18  
19 **Funding** This research received no specific grant from any funding agency.  
20

21 **Competing interests** The authors declare that they have no competing interests.  
22

23  
24 **Patient consent for publication** Not required.  
25

26  
27 **Provenance and peer review** Not commissioned; externally peer reviewed.  
28

29 **Ethical Approval** Not applicable.  
30

31  
32 **Data availability statement** All data are fully available without restriction.  
33

### 34 **ORCID**

35 Hai-Li Wang: <https://orcid.org/0000-0002-0310-8143>;

36 Lei Zhong: <https://orcid.org/0000-0002-0208-1823>;

37 Xiao-hong Huang: <https://orcid.org/0000-0003-4737-7780>.  
38  
39  
40  
41  
42  
43

### 44 **REFERENCES**

- 45  
46 1. Padilla-Martinez F, Collin F, Kwasniewski M, Kretowski A. Systematic Review of Polygenic Risk  
47 Scores for Type 1 and Type 2 Diabetes. *International journal of molecular sciences*.  
48 2020;21(5).  
49  
50 2. Zhou T, Li HY, Zhong H, Zhong Z. Relationship between transforming growth factor-beta1 and  
51 type 2 diabetic nephropathy risk in Chinese population. *BMC medical genetics*.  
52 2018;19(1):201.  
53  
54 3. International Diabetes Federation. IDF Diabetes Atlas. 9th ed. Brussels, Belgium:  
55 International Diabetes Federation. 2019  
56 [https://diabetesatlas.org/upload/resources/material/20200302\\_133351\\_IDFATLAS9e-final-w](https://diabetesatlas.org/upload/resources/material/20200302_133351_IDFATLAS9e-final-web.pdf)  
57 [eb.pdf](https://diabetesatlas.org/upload/resources/material/20200302_133351_IDFATLAS9e-final-web.pdf). Accessed April 18, 2020.  
58  
59 4. Mulyani WRW, Sanjiwani MID, Sandra, et al. Chaperone-Based Therapeutic Target Innovation:  
60



- Heat Shock Protein 70 (HSP70) for Type 2 Diabetes Mellitus. *Diabetes, metabolic syndrome and obesity : targets and therapy*. 2020;13:559-568.
5. Rachdaoui N. Insulin: The Friend and the Foe in the Development of Type 2 Diabetes Mellitus. *International journal of molecular sciences*. 2020;21(5).
  6. Nimmagadda S, Penet MF. Ovarian Cancer Targeted Theranostics. *Frontiers in oncology*. 2019;9:1537.
  7. Bergsten TM, Burdette JE, Dean M. Fallopian tube initiation of high grade serous ovarian cancer and ovarian metastasis: Mechanisms and therapeutic implications. *Cancer letters*. 2020;476:152-160.
  8. Global Cancer Observatory. 2020; [http://gco.iarc.fr/tomorrow/graphic-isotype?type=0&type\\_sex=0&mode=population&sex=2&populations=900&cancers=25&age\\_group=value&apc\\_male=0&apc\\_female=0&print=0](http://gco.iarc.fr/tomorrow/graphic-isotype?type=0&type_sex=0&mode=population&sex=2&populations=900&cancers=25&age_group=value&apc_male=0&apc_female=0&print=0). Accessed April 18, 2020.
  9. Arend R, Martinez A, Szul T, Birrer MJ. Biomarkers in ovarian cancer: To be or not to be. *Cancer*. 2019;125 Suppl 24:4563-4572.
  10. Loret N, Denys H, Tummers P, Bex G. The Role of Epithelial-to-Mesenchymal Plasticity in Ovarian Cancer Progression and Therapy Resistance. *Cancers*. 2019;11(6).
  11. Ferlay J, Soerjomataram I, Dikshit R, et al. Cancer incidence and mortality worldwide: sources, methods and major patterns in GLOBOCAN 2012. *Int J Cancer*. 2015;136(5):E359-386.
  12. Bacalbasa N, Balescu I, Vilcu M, et al. The Risk of Para-Aortic Lymph Node Metastases in Apparent Early Stage Ovarian Cancer. *Medicina (Kaunas)*. 2020;56(3).
  13. Mallen AR, Townsend MK, Tworoger SS. Risk Factors for Ovarian Carcinoma. *Hematology/oncology clinics of North America*. 2018;32(6):891-902.
  14. Stewart C, Ralyea C, Lockwood S. Ovarian Cancer: An Integrated Review. *Semin Oncol Nurs*. 2019;35(2):151-156.
  15. Linkeviciute-Ulinskiene D, Patasius A, Zabuliene L, Stukas R, Smailyte G. Increased Risk of Site-Specific Cancer in People with Type 2 Diabetes: A National Cohort Study. *International journal of environmental research and public health*. 2019;17(1).
  16. Wideroff L, Gridley G, Møller M, et al. Cancer incidence in a population-based cohort of patients hospitalized with diabetes mellitus in Denmark. *Journal of the National Cancer Institute*. 1997;89(18):1360-1365.
  17. Oberaigner W, Ebenbichler C, Oberaigner K, Juchum M, Schönherr HR, Lechleitner M. Increased cancer incidence risk in type 2 diabetes mellitus: results from a cohort study in Tyrol/Austria. *BMC public health*. 2014;14:1058.
  18. Wang Y, Wang B, Yan S, et al. Type 2 diabetes and gender differences in liver cancer by considering different confounding factors: a meta-analysis of cohort studies. *Annals of epidemiology*. 2016;26(11):764-772.
  19. Song S, Wang B, Zhang X, et al. Long-Term Diabetes Mellitus Is Associated with an Increased Risk of Pancreatic Cancer: A Meta-Analysis. *PLoS One*. 2015;10(7):e0134321.
  20. Liao C, Zhang D, Mungo C, Tompkins DA, Zeidan AM. Is diabetes mellitus associated with increased incidence and disease-specific mortality in endometrial cancer? A systematic review and meta-analysis of cohort studies. *Gynecol Oncol*. 2014;135(1):163-171.
  21. Carstensen B, Read SH, Friis S, et al. Cancer incidence in persons with type 1 diabetes: a five-country study of 9,000 cancers in type 1 diabetic individuals. *Diabetologia*.

- 2016;59(5):980-988.
22. Hasan S, Shaw SM, Gelling LH, Kerr CJ, Meads CA. Exercise modes and their association with hypoglycemia episodes in adults with type 1 diabetes mellitus: a systematic review. *BMJ open diabetes research & care*. 2018;6(1):e000578.
  23. Fuchs O, Sheiner E, Meirovitz M, Davidson E, Sergienko R, Kessous R. The association between a history of gestational diabetes mellitus and future risk for female malignancies. *Archives of gynecology and obstetrics*. 2017;295(3):731-736.
  24. Dankner R, Boffetta P, Balicer RD, et al. Time-Dependent Risk of Cancer After a Diabetes Diagnosis in a Cohort of 2.3 Million Adults. *American journal of epidemiology*. 2016;183(12):1098-1106.
  25. Harding JL, Shaw JE, Peeters A, Cartensen B, Magliano DJ. Cancer risk among people with type 1 and type 2 diabetes: disentangling true associations, detection bias, and reverse causation. *Diabetes care*. 2015;38(2):264-270.
  26. Ballotari P, Vicentini M, Manicardi V, et al. Diabetes and risk of cancer incidence: results from a population-based cohort study in northern Italy. *BMC cancer*. 2017;17(1):703.
  27. Reis N, Kizilkaya Beji N. Risk factors for ovarian cancer: Results from a hospital-based case-control study. *Turkiye Klinikleri Journal of Medical Sciences*. 2010;30(1):79-87.
  28. Han KT, Cho GJ, Kim EH. Evaluation of the Association between Gestational Diabetes Mellitus at First Pregnancy and Cancer within 10 Years Postpartum Using National Health Insurance Data in South Korea. *Int J Environ Res Public Health*. 2018;15(12).
  29. He X, Shi L, Wu J. Retrospective database analysis of cancer risk in patients with type 2 diabetes mellitus in China. *Curr Med Res Opin*. 2018;34(6):1089-1098.
  30. Chen HF, Chang YH, Ko MC, Li CY. A large scale population-based cohort study on the risk of ovarian neoplasm in patients with type 2 diabetes mellitus. *Gynecologic oncology*. 2014;134(3):576-580.
  31. Gapstur SM, Patel AV, Diver WR, et al. Type II diabetes mellitus and the incidence of epithelial ovarian cancer in the cancer prevention study-II nutrition cohort. *Cancer Epidemiol Biomarkers Prev*. 2012;21(11):2000-2005.
  32. Stroup DF, Berlin JA, Morton SC, et al. Meta-analysis of observational studies in epidemiology: a proposal for reporting. Meta-analysis Of Observational Studies in Epidemiology (MOOSE) group. *Jama*. 2000;283(15):2008-2012.
  33. Moher D, Liberati A, Tetzlaff J, Altman DG, Group P. Preferred reporting items for systematic reviews and meta-analyses: the PRISMA statement. *Bmj*. 2009;339:b2535.
  34. Stang A. Critical evaluation of the Newcastle-Ottawa scale for the assessment of the quality of nonrandomized studies in meta-analyses. *European journal of epidemiology*. 2010;25(9):603-605.
  35. Higgins JPT, Green S, Cochrane Collaboration. *Cochrane handbook for systematic reviews of interventions*. Chichester, England ; Hoboken, NJ: Wiley-Blackwell; 2008.
  36. Siristatidis C, Sergantani TN, Kanavidis P, et al. Controlled ovarian hyperstimulation for IVF: impact on ovarian, endometrial and cervical cancer--a systematic review and meta-analysis. *Human reproduction update*. 2013;19(2):105-123.
  37. Borenstein M, Hedges LV, Higgins JP, Rothstein HR. A basic introduction to fixed-effect and random-effects models for meta-analysis. *Res Synth Methods*. 2010;1(2):97-111.
  38. Weiderpass E, Ye W, Vainio H, Kaaks R, Adami HO. Diabetes mellitus and ovarian cancer

- (Sweden). *Cancer causes & control : CCC*. 2002;13(8):759-764.
39. Zendejdel K, Nyren O, Ostenson CG, Adami HO, Ekblom A, Ye W. Cancer incidence in patients with type 1 diabetes mellitus: a population-based cohort study in Sweden. *Journal of the National Cancer Institute*. 2003;95(23):1797-1800.
40. Swerdlow AJ, Laing SP, Qiao Z, et al. Cancer incidence and mortality in patients with insulin-treated diabetes: a UK cohort study. *Br J Cancer*. 2005;92(11):2070-2075.
41. Inoue M, Iwasaki M, Otani T, Sasazuki S, Noda M, Tsugane S. Diabetes mellitus and the risk of cancer: results from a large-scale population-based cohort study in Japan. *Arch Intern Med*. 2006;166(17):1871-1877.
42. Khan M, Mori M, Fujino Y, et al. Site-specific cancer risk due to diabetes mellitus history: evidence from the Japan Collaborative Cohort (JACC) Study. *Asian Pac J Cancer Prev*. 2006;7(2):253-259.
43. Hemminki K, Li X, Sundquist J, Sundquist K. Risk of cancer following hospitalization for type 2 diabetes. *Oncologist*. 2010;15(6):548-555.
44. Chodick G, Heymann AD, Rosenmann L, et al. Diabetes and risk of incident cancer: a large population-based cohort study in Israel. *Cancer causes & control : CCC*. 2010;21(6):879-887.
45. Shu X, Ji J, Li X, Sundquist J, Sundquist K, Hemminki K. Cancer risk among patients hospitalized for Type 1 diabetes mellitus: a population-based cohort study in Sweden. *Diabetic medicine : a journal of the British Diabetic Association*. 2010;27(7):791-797.
46. Wotton CJ, Yeates DG, Goldacre MJ. Cancer in patients admitted to hospital with diabetes mellitus aged 30 years and over: record linkage studies. *Diabetologia*. 2011;54(3):527-534.
47. Johnson JA, Bowker SL, Richardson K, Marra CA. Time-varying incidence of cancer after the onset of type 2 diabetes: evidence of potential detection bias. *Diabetologia*. 2011;54(9):2263-2271.
48. Lambe M, Wigertz A, Garmo H, Walldius G, Jungner I, Hammar N. Impaired glucose metabolism and diabetes and the risk of breast, endometrial, and ovarian cancer. *Cancer causes & control : CCC*. 2011;22(8):1163-1171.
49. Lo SF, Chang SN, Muo CH, et al. Modest increase in risk of specific types of cancer types in type 2 diabetes mellitus patients. *Int J Cancer*. 2013;132(1):182-188.
50. Hsu PC, Lin WH, Kuo TH, Lee HM, Kuo C, Li CY. A Population-Based Cohort Study of All-Cause and Site-Specific Cancer Incidence Among Patients With Type 1 Diabetes Mellitus in Taiwan. *Journal of epidemiology*. 2015;25(9):567-573.
51. Bao C, Pedersen NL, Yang R, et al. Diabetes in midlife and risk of cancer in late life: A nationwide Swedish twin study. *Int J Cancer*. 2018;143(4):793-800.
52. Saarela K, Tuomilehto J, Sund R, Keskimaki I, Hartikainen S, Pukkala E. Cancer incidence among Finnish people with type 2 diabetes during 1989-2014. *European journal of epidemiology*. 2019;34(3):259-265.
53. Peng YS, Lin JR, Cheng BH, et al. Incidence and relative risk for developing cancers in women with gestational diabetes mellitus: a nationwide cohort study in Taiwan. *BMJ Open*. 2019;9(2):e024583.
54. Pace R, Rahme E, Dasgupta K. Gestational diabetes mellitus and risk of incident primary cancer: A population-based retrospective cohort study. *Journal of diabetes*. 2020;12(1):87-90.
55. O'Mara BA, Byers T, Schoenfeld E. Diabetes mellitus and cancer risk: a multisite case-control

- study. *Journal of chronic diseases*. 1985;38(5):435-441.
56. Adler AI, Weiss NS, Kamb ML, Lyon JL. Is diabetes mellitus a risk factor for ovarian cancer? A case-control study in Utah and Washington (United States). *Cancer causes & control : CCC*. 1996;7(4):475-478.
57. Parazzini F, Moroni S, La Vecchia C, Negri E, dal Pino D, Bolis G. Ovarian cancer risk and history of selected medical conditions linked with female hormones. *Eur J Cancer*. 1997;33(10):1634-1637.
58. Mori M, Nishida T, Sugiyama T, et al. Anthropometric and other risk factors for ovarian cancer in a case-control study. *Jpn J Cancer Res*. 1998;89(3):246-253.
59. Kuriki K, Hirose K, Tajima K. Diabetes and cancer risk for all and specific sites among Japanese men and women. *European journal of cancer prevention : the official journal of the European Cancer Prevention Organisation (ECP)*. 2007;16(1):83-89.
60. Attner B, Landin-Olsson M, Lithman T, Noreen D, Olsson H. Cancer among patients with diabetes, obesity and abnormal blood lipids: a population-based register study in Sweden. *Cancer causes & control : CCC*. 2012;23(5):769-777.
61. Bosetti C, Rosato V, Polesel J, et al. Diabetes mellitus and cancer risk in a network of case-control studies. *Nutrition and cancer*. 2012;64(5):643-651.
62. Ruiz MP, Morales-Ramirez PB, Dziadek OL, Algren SD. Epithelial ovarian cancer and type of peritoneal insult: a case-control study. *European journal of obstetrics, gynecology, and reproductive biology*. 2016;205:170-173.
63. Setia MS. Methodology Series Module 2: Case-control Studies. *Indian J Dermatol*. 2016;61(2):146-151.
64. Smith U, Gale EA. Does diabetes therapy influence the risk of cancer? *Diabetologia*. 2009;52(9):1699-1708.
65. Carstensen B, Witte DR, Friis S. Cancer occurrence in Danish diabetic patients: duration and insulin effects. *Diabetologia*. 2012;55(4):948-958.
66. Wang Y, Yan P, Fu T, et al. The association between gestational diabetes mellitus and cancer in women: A systematic review and meta-analysis of observational studies. *Diabetes & metabolism*. 2020.
67. Zhang D, Li N, Xi Y, Zhao Y, Wang T. Diabetes mellitus and risk of ovarian cancer. A systematic review and meta-analysis of 15 cohort studies. *Diabetes research and clinical practice*. 2017;130:43-52.
68. Lee JY, Jeon I, Kim JW, Song YS, Yoon JM, Park SM. Diabetes mellitus and ovarian cancer risk: a systematic review and meta-analysis of observational studies. *International journal of gynecological cancer : official journal of the International Gynecological Cancer Society*. 2013;23(3):402-412.
69. Wang L, Wang L, Zhang J, Wang B, Liu H. Association between diabetes mellitus and subsequent ovarian cancer in women: A systematic review and meta-analysis of cohort studies. *Medicine*. 2017;96(16):e6396.
70. Kellenberger LD, Bruin JE, Greenaway J, et al. The role of dysregulated glucose metabolism in epithelial ovarian cancer. *J Oncol*. 2010;2010:514310.
71. Weinert LS. International Association of Diabetes and Pregnancy Study Groups recommendations on the diagnosis and classification of hyperglycemia in pregnancy: comment to the International Association of Diabetes and Pregnancy Study Groups

- 1  
2  
3  
4  
5  
6  
7  
8  
9  
10  
11  
12  
13  
14  
15  
16  
17  
18  
19  
20  
21  
22  
23  
24  
25  
26  
27  
28  
29  
30  
31  
32  
33  
34  
35  
36  
37  
38  
39  
40  
41  
42  
43  
44  
45  
46  
47  
48  
49  
50  
51  
52  
53  
54  
55  
56  
57  
58  
59  
60
- Consensus Panel. *Diabetes care*. 2010;33(7):e97; author reply e98.
72. Piek JM, Kenemans P, Verheijen RH. Intraperitoneal serous adenocarcinoma: a critical appraisal of three hypotheses on its cause. *Am J Obstet Gynecol*. 2004;191(3):718-732.
73. Giannarelli R, Aragona M, Coppelli A, Del Prato S. Reducing insulin resistance with metformin: the evidence today. *Diabetes Metab*. 2003;29(4 Pt 2):6S28-35.
74. Suh S, Kim KW. Diabetes and Cancer: Cancer Should Be Screened in Routine Diabetes Assessment. *Diabetes & metabolism journal*. 2019;43(6):733-743.
75. Hussain S, Chowdhury TA. The Impact of Comorbidities on the Pharmacological Management of Type 2 Diabetes Mellitus. *Drugs*. 2019;79(3):231-242.

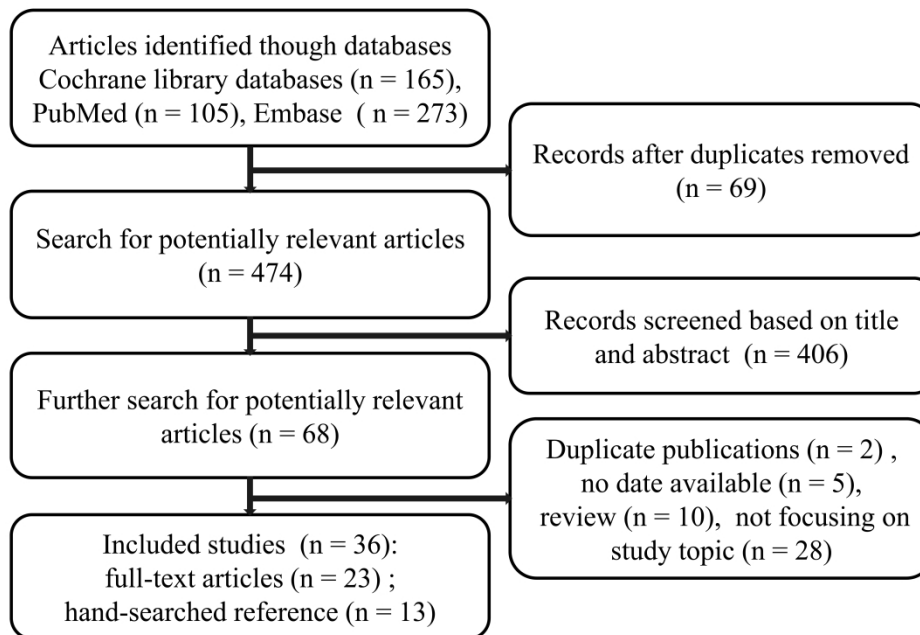

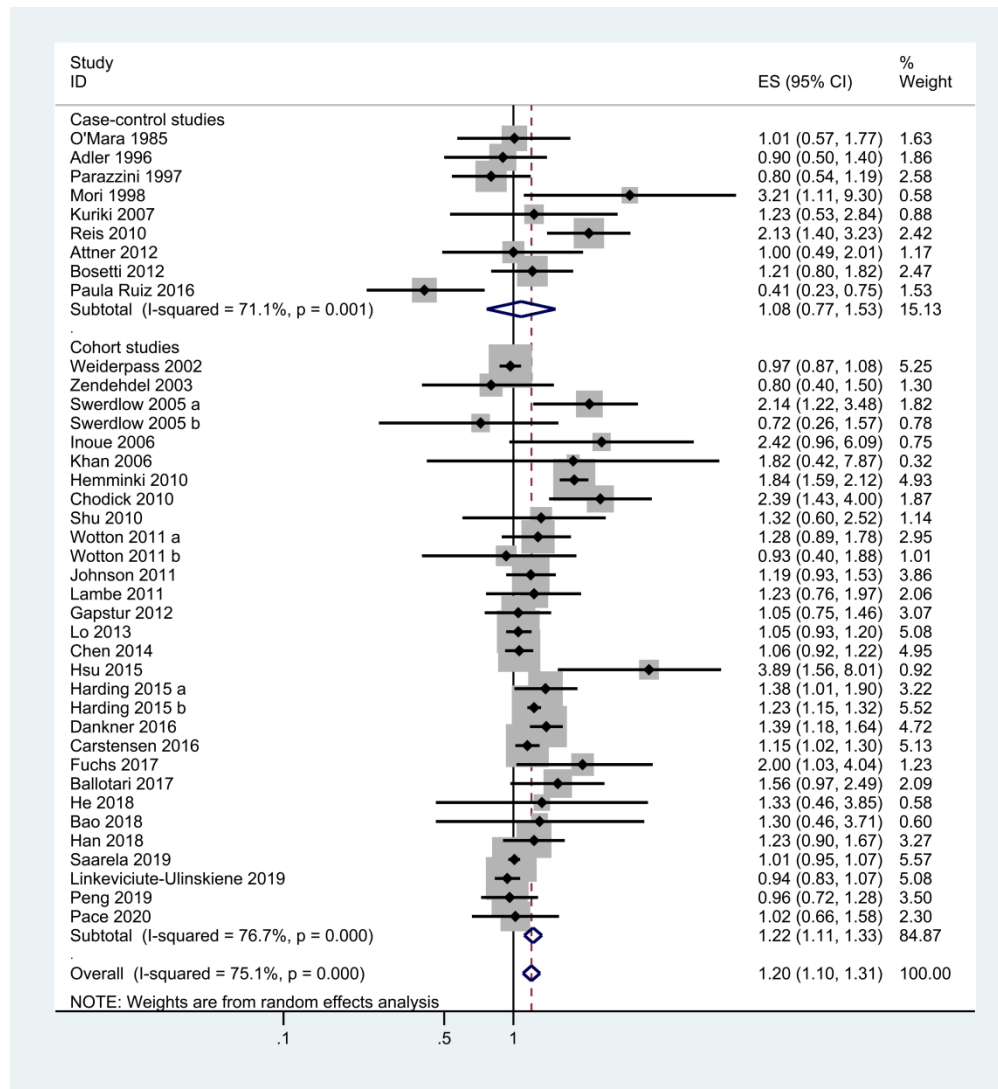

1  
2  
3  
4  
5  
6  
7  
8  
9  
10  
11  
12  
13  
14  
15  
16  
17  
18  
19  
20  
21  
22  
23  
24  
25  
26  
27  
28  
29  
30  
31  
32  
33  
34  
35  
36  
37  
38  
39  
40  
41  
42  
43  
44  
45  
46  
47  
48  
49  
50  
51  
52  
53  
54  
55  
56  
57  
58  
59  
60

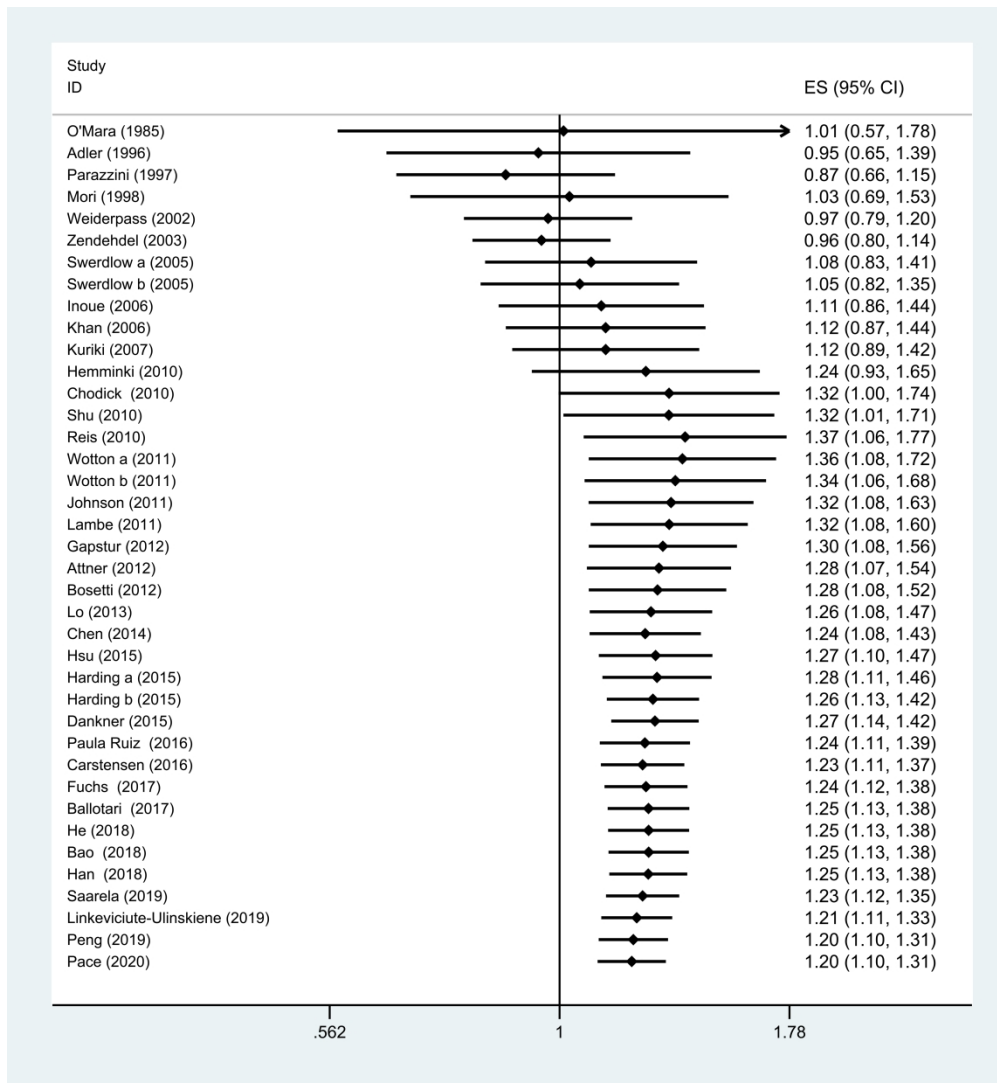



### The Meta-analysis of Observational Studies in Epidemiology (MOOSE) protocol checklist

| Criteria                                                                        | Brief description of how the criteria were handled in the meta-analysis                                                                                                                        |
|---------------------------------------------------------------------------------|------------------------------------------------------------------------------------------------------------------------------------------------------------------------------------------------|
| <b>Reporting of background should include</b>                                   |                                                                                                                                                                                                |
| √ Problem definition                                                            | A history of diabetes mellitus (DM) has been linked to increased risk of ovarian cancer (OC), but the results have not been consistent. The aim of this study was to clarify this association. |
| √ Hypothesis statement                                                          | DM increases the risk of OC.                                                                                                                                                                   |
| √ Description of study outcomes                                                 | OC                                                                                                                                                                                             |
| √ Type of exposure or intervention used                                         | DM                                                                                                                                                                                             |
| √ Type of study designs used                                                    | Observational studies: cohort and case-control studies.                                                                                                                                        |
| √ Study population                                                              | No restriction.                                                                                                                                                                                |
| <b>Reporting of search strategy should include</b>                              |                                                                                                                                                                                                |
| √ Qualifications of searchers                                                   | ZL (first author) and WHL have published a meta-analysis in Critical care in 2017 (with experience of literature search).                                                                      |
| √ Search strategy, including time period included in the synthesis and keywords | PubMed from 1965 –April 2020<br>EMBASE from 1974 –April 2020<br>Cochrane library databases 1974 –April 2020<br>See additional file 2 the search strategy and search results.                   |
| √ Databases and registries searched                                             | PubMed, Embase and the Cochrane library databases                                                                                                                                              |
| √ Search software used, name and version, including special features            | No search software is being used.<br>The process of retrieving citations and eliminating the duplications was used by EndNote software.                                                        |
| √ Use of hand searching                                                         | The potentially eligible bibliographies of relevant articles were manually examined to identify any additional publications relevant to our study.                                             |
| √ List of citations located and those excluded, including justifications        | The literature search process is given in flow diagram.                                                                                                                                        |
| √ Method of addressing articles published in languages other than English       | Through a translation app or consult professionals.                                                                                                                                            |
| √ Method of handling abstracts and unpublished studies                          | Not applicable                                                                                                                                                                                 |
| √ Description of any contact with authors                                       | Not applicable                                                                                                                                                                                 |

|                                               |                                                                                                                                            |                                                                                                                                                                                                                                                   |
|-----------------------------------------------|--------------------------------------------------------------------------------------------------------------------------------------------|---------------------------------------------------------------------------------------------------------------------------------------------------------------------------------------------------------------------------------------------------|
| <b>Reporting of methods should include</b>    |                                                                                                                                            |                                                                                                                                                                                                                                                   |
| √                                             | Description of relevance or appropriateness of studies assembled for assessing the hypothesis to be tested                                 | Detailed inclusion and exclusion criteria were also given in our study.                                                                                                                                                                           |
| √                                             | Rationale for the selection and coding of data                                                                                             | The PICO framework                                                                                                                                                                                                                                |
| √                                             | Assessment of confounding                                                                                                                  | Sensitivity analyses                                                                                                                                                                                                                              |
| √                                             | Assessment of study quality, including blinding of quality assessors; stratification or regression on possible predictors of study results | The Newcastle-Ottawa Scale (NOS) score                                                                                                                                                                                                            |
| √                                             | Assessment of heterogeneity                                                                                                                | The statistical heterogeneity was measured by $\chi^2$ (threshold $p=0.10$ ) and quantified by the $I^2$ statistic.                                                                                                                               |
| √                                             | Description of statistical methods in sufficient detail to be replicated                                                                   | The details refer to the “Statistical analysis” in our study.                                                                                                                                                                                     |
| √                                             | Provision of appropriate tables and graphics                                                                                               | We included 1 box detailing the terms used for database search, 1 flow chart, 1 summary table, 1 forest plot of all studies, 1 forest plot to examine effect modification by age, 1 table of sensitivity analyses.                                |
| <b>Reporting of results should include</b>    |                                                                                                                                            |                                                                                                                                                                                                                                                   |
| √                                             | Graph summarizing individual study estimates and overall estimate                                                                          | Figure 2                                                                                                                                                                                                                                          |
| √                                             | Table giving descriptive information for each study included                                                                               | Table 1                                                                                                                                                                                                                                           |
| √                                             | Results of sensitivity testing                                                                                                             | Additional file 4                                                                                                                                                                                                                                 |
| √                                             | Indication of statistical uncertainty of findings                                                                                          | For more details refer to the<br><br>The pooled effects were analyzed by relative risk (RR) with 95% confidence interval, and the statistical heterogeneity was measured by $\chi^2$ (threshold $p=0.10$ ) and quantified by the $I^2$ statistic. |
| <b>Reporting of discussion should include</b> |                                                                                                                                            |                                                                                                                                                                                                                                                   |
| √                                             | Quantitative assessment of bias                                                                                                            | The cumulative meta-analysis and sensitivity analysis showed pooled effect was stable and reliable.                                                                                                                                               |
| √                                             | Justification for exclusion                                                                                                                | The exclusion criteria in this meta-analysis were: randomized controlled trial, case reports, letters, reviews or animals studies.                                                                                                                |
| √                                             | Assessment of quality of                                                                                                                   | No apparent publication bias was identified in this                                                                                                                                                                                               |

|   |                                                                |                                                                                                                                                                                                                     |
|---|----------------------------------------------------------------|---------------------------------------------------------------------------------------------------------------------------------------------------------------------------------------------------------------------|
|   | included studies                                               | meta-analysis.                                                                                                                                                                                                      |
|   | <b>Reporting of conclusions should include</b>                 |                                                                                                                                                                                                                     |
| √ | Consideration of alternative explanations for observed results | Significant heterogeneity between these studies was observed.                                                                                                                                                       |
| √ | Generalization of the conclusions                              | Women with history of DM have a higher risk of OC than those who without.                                                                                                                                           |
| √ | Guidelines for future research                                 | Further high-quality studies with prospective design that are adequately controlled for potential confounding factors and verified the association with subtypes of OC should be conducted to identify our results. |
| √ | Disclosure of funding source                                   | This research received no specific grant from any funding agency.                                                                                                                                                   |

## Systematic reviews and meta-analyses (PRISMA) guidelines

1  
2  
3  
4  
5  
6  
7  
8  
9  
10  
11  
12  
13  
14  
15  
16  
17  
18  
19  
20  
21  
22  
23  
24  
25  
26  
27  
28  
29  
30  
31  
32  
33  
34  
35  
36  
37  
38  
39  
40  
41  
42  
43  
44  
45  
46  
47

| Section/topic             | #  | Checklist item                                                                                                                                                                                                                                                                                              | Reported on page # |
|---------------------------|----|-------------------------------------------------------------------------------------------------------------------------------------------------------------------------------------------------------------------------------------------------------------------------------------------------------------|--------------------|
| <b>TITLE</b>              |    |                                                                                                                                                                                                                                                                                                             |                    |
| Title                     | 1  | Identify the report as a systematic review, meta-analysis, or both.                                                                                                                                                                                                                                         | Title              |
| <b>ABSTRACT</b>           |    |                                                                                                                                                                                                                                                                                                             |                    |
| Structured summary        | 2  | Provide a structured summary including, as applicable: background; objectives; data sources; study eligibility criteria, participants, and interventions; study appraisal and synthesis methods; results; limitations; conclusions and implications of key findings; systematic review registration number. | Abstract           |
| <b>INTRODUCTION</b>       |    |                                                                                                                                                                                                                                                                                                             |                    |
| Rationale                 | 3  | Describe the rationale for the review in the context of what is already known.                                                                                                                                                                                                                              | Introduction       |
| Objectives                | 4  | Provide an explicit statement of questions being addressed with reference to participants, interventions, comparisons, outcomes, and study design (PICOS).                                                                                                                                                  | Methods            |
| <b>METHODS</b>            |    |                                                                                                                                                                                                                                                                                                             |                    |
| Protocol and registration | 5  | Indicate if a review protocol exists, if and where it can be accessed (e.g., Web address), and, if available, provide registration information including registration number.                                                                                                                               | None               |
| Eligibility criteria      | 6  | Specify study characteristics (e.g., PICOS, length of follow-up) and report characteristics (e.g., years considered, language, publication status) used as criteria for eligibility, giving rationale.                                                                                                      | Methods            |
| Information sources       | 7  | Describe all information sources (e.g., databases with dates of coverage, contact with study authors to identify additional studies) in the search and date last searched.                                                                                                                                  | Methods            |
| Search                    | 8  | Present full electronic search strategy for at least one database, including any limits used, such that it could be repeated.                                                                                                                                                                               | Methods            |
| Study selection           | 9  | State the process for selecting studies (i.e., screening, eligibility, included in systematic review, and, if applicable, included in the meta-analysis).                                                                                                                                                   | Methods            |
| Data collection process   | 10 | Describe method of data extraction from reports (e.g., piloted forms, independently, in duplicate) and any processes for obtaining and confirming data from investigators.                                                                                                                                  | Methods            |

1  
2  
3  
4

|                                      |    |                                                                                                                                                                                                                        |         |
|--------------------------------------|----|------------------------------------------------------------------------------------------------------------------------------------------------------------------------------------------------------------------------|---------|
| 5 Data items                         | 11 | List and define all variables for which data were sought (e.g., PICOS, funding sources) and any assumptions and simplifications made.                                                                                  | Methods |
| 7 Risk of bias in individual studies | 12 | Describe methods used for assessing risk of bias of individual studies (including specification of whether this was done at the study or outcome level), and how this information is to be used in any data synthesis. | Methods |
| 9 Summary measures                   | 13 | State the principal summary measures (e.g., risk ratio, difference in means).                                                                                                                                          | Methods |
| 11 Synthesis of results              | 14 | Describe the methods of handling data and combining results of studies, if done, including measures of consistency (e.g., I <sup>2</sup> ) for each meta-analysis.                                                     | Methods |

14  
15

| 7 Section/topic                  | #  | Checklist item                                                                                                                                                                                           | Reported on page # |
|----------------------------------|----|----------------------------------------------------------------------------------------------------------------------------------------------------------------------------------------------------------|--------------------|
| 9 Risk of bias across studies    | 15 | Specify any assessment of risk of bias that may affect the cumulative evidence (e.g., publication bias, selective reporting within studies).                                                             | Methods            |
| 22 Additional analyses           | 16 | Describe methods of additional analyses (e.g., sensitivity or subgroup analyses, meta-regression), if done, indicating which were pre-specified.                                                         | Methods            |
| <b>RESULTS</b>                   |    |                                                                                                                                                                                                          |                    |
| 26 Study selection               | 17 | Give numbers of studies screened, assessed for eligibility, and included in the review, with reasons for exclusions at each stage, ideally with a flow diagram.                                          | Results            |
| 28 Study characteristics         | 18 | For each study, present characteristics for which data were extracted (e.g., study size, PICOS, follow-up period) and provide the citations.                                                             | Results            |
| 31 Risk of bias within studies   | 19 | Present data on risk of bias of each study and, if available, any outcome level assessment (see item 12).                                                                                                | Results            |
| 32 Results of individual studies | 20 | For all outcomes considered (benefits or harms), present, for each study: (a) simple summary data for each intervention group (b) effect estimates and confidence intervals, ideally with a forest plot. | Results            |
| 35 Synthesis of results          | 21 | Present results of each meta-analysis done, including confidence intervals and measures of consistency.                                                                                                  | Results            |
| 36 Risk of bias across studies   | 22 | Present results of any assessment of risk of bias across studies (see Item 15).                                                                                                                          | Results            |
| 38 Additional analysis           | 23 | Give results of additional analyses, if done (e.g., sensitivity or subgroup analyses, meta-regression [see Item 16]).                                                                                    | Results            |

39  
40  
41  
42  
43  
44  
45  
46  
47

1  
2  
3  
4  
5  
6  
7  
8  
9  
10  
11  
12  
13  
14  
15  
16  
17  
18  
19  
20  
21  
22  
23  
24  
25  
26  
27  
28  
29  
30  
31  
32  
33  
34  
35  
36  
37  
38  
39  
40  
41  
42  
43  
44  
45  
46  
47

| <b>DISCUSSION</b>   |    |                                                                                                                                                                                      |             |
|---------------------|----|--------------------------------------------------------------------------------------------------------------------------------------------------------------------------------------|-------------|
| Summary of evidence | 24 | Summarize the main findings including the strength of evidence for each main outcome; consider their relevance to key groups (e.g., healthcare providers, users, and policy makers). | Discussion  |
| Limitations         | 25 | Discuss limitations at study and outcome level (e.g., risk of bias), and at review-level (e.g., incomplete retrieval of identified research, reporting bias).                        | Discussion  |
| Conclusions         | 26 | Provide a general interpretation of the results in the context of other evidence, and implications for future research.                                                              | Conclusions |
| <b>FUNDING</b>      |    |                                                                                                                                                                                      |             |
| Funding             | 27 | Describe sources of funding for the systematic review and other support (e.g., supply of data); role of funders for the systematic review.                                           | None        |

From: Moher D, Liberati A, Tetzlaff J, Altman DG, The PRISMA Group (2009). Preferred Reporting Items for Systematic Reviews and Meta-Analyses: The PRISMA Statement. PLoS Med 6(7): e1000097. doi:10.1371/journal.pmed1000097

For more information, visit: [www.prisma-statement.org](http://www.prisma-statement.org).

### Additional file 2: The search strategy and search results

PubMed (n=105), the Cochrane library databases(n=165) and Embase (n=273)

#### PubMed:

#1 (((((((((((((((("Ovarian Neoplasms"[Mesh]) OR "Ovarian Neoplasms"[Title/Abstract]) OR "Neoplasm, Ovarian"[Title/Abstract]) OR "Ovarian Neoplasm"[Title/Abstract]) OR "Ovary Neoplasms"[Title/Abstract]) OR "Neoplasm, Ovary"[Title/Abstract]) OR "Ovary Neoplasm"[Title/Abstract]) OR "Neoplasms, Ovarian"[Title/Abstract]) OR "Ovary Cancer"[Title/Abstract]) OR "Cancer, Ovary"[Title/Abstract]) OR "Ovary Cancers"[Title/Abstract]) OR "Ovarian Cancer"[Title/Abstract]) OR "Cancer, Ovarian"[Title/Abstract]) OR "Ovarian Cancers"[Title/Abstract]) OR "Cancer of Ovary"[Title/Abstract]) OR "Cancer of the Ovary"[Title/Abstract])) OR (((((((((((((((("Carcinoma, Ovarian Epithelial"[Mesh]) OR "Ovarian Epithelial Carcinomas"[Title/Abstract]) OR "Epithelial Ovarian Cancer"[Title/Abstract]) OR "Ovarian Epithelial Cancers"[Title/Abstract]) OR "Ovarian Epithelial Cancer"[Title/Abstract]) OR "Epithelial Ovarian Cancers"[Title/Abstract]) OR "Ovarian Epithelial Carcinoma"[Title/Abstract]) OR "Epithelial Ovarian Carcinoma"[Title/Abstract]) OR "Epithelial Ovarian Carcinomas"[Title/Abstract]) OR "ovarian carcinoma"[Title/Abstract])) 101778

#2 (((("diabete\*"[Title/Abstract]) OR (((((((((((((((("Diabetes Mellitus, Type 1"[Title/Abstract]) OR "Insulin-Dependent Diabetes Mellitus"[Title/Abstract]) OR "Juvenile-Onset Diabetes Mellitus"[Title/Abstract]) OR "IDDM"[Title/Abstract]) OR "Juvenile-Onset Diabetes"[Title/Abstract]) OR "Juvenile Onset Diabetes"[Title/Abstract]) OR "Sudden-Onset Diabetes Mellitus"[Title/Abstract]) OR "Type 1 Diabetes Mellitus"[Title/Abstract]) OR "Insulin-Dependent Diabetes Mellitus 1"[Title/Abstract]) OR "Insulin Dependent Diabetes Mellitus 1"[Title/Abstract]) OR "Type 1 Diabetes"[Title/Abstract]) OR "Diabetes, Type 1"[Title/Abstract]) OR "Autoimmune Diabetes"[Title/Abstract]) OR "Brittle Diabetes Mellitus"[Title/Abstract]) OR "Ketosis-Prone Diabetes Mellitus"[Title/Abstract]) OR "Diabetes Mellitus, Type 1"[Mesh])) OR (((((((((((((((("Diabetes Mellitus, Type 2"[Title/Abstract]) OR "Ketosis-Resistant Diabetes Mellitus"[Title/Abstract]) OR "Non-Insulin-Dependent Diabetes Mellitus"[Title/Abstract]) OR "Stable Diabetes Mellitus"[Title/Abstract]) OR "NIDDM"[Title/Abstract]) OR "Maturity-Onset Diabetes Mellitus"[Title/Abstract]) OR "Maturity Onset Diabetes Mellitus"[Title/Abstract]) OR "MODY"[Title/Abstract]) OR "Type 2 Diabetes Mellitus"[Title/Abstract]) OR "Noninsulin-Dependent Diabetes Mellitus"[Title/Abstract]) OR "Noninsulin Dependent Diabetes Mellitus"[Title/Abstract]) OR "Maturity-Onset Diabetes"[Title/Abstract]) OR "Maturity Onset Diabetes"[Title/Abstract]) OR "Type 2 Diabetes"[Title/Abstract]) OR "Adult-Onset Diabetes Mellitus"[Title/Abstract]) OR "Diabetes Mellitus, Type 2"[Mesh])) OR ((("Diabetes Mellitus"[Mesh]) OR "Diabetes Mellitus"[Title/Abstract]))) OR (((("Gestational Diabetes Mellitus"[Title/Abstract]) OR "Diabetes Mellitus, Gestational"[Title/Abstract]) OR

"Gestational Diabetes"[Title/Abstract]) OR "Pregnancy-Induced Diabetes"[Title/Abstract]) OR "Diabetes, Gestational"[Mesh])) 523490

#3 (((("Observational Studies as Topic"[Mesh]) OR "Observational Study"[Publication Type])) OR (((((((((((((((((((("Case-Control Studies"[Mesh]) OR "Case-Control Studies"[Title/Abstract]) OR "Case-Control Study"[Title/Abstract]) OR "Case-Comparison Studies"[Title/Abstract]) OR "Case Comparison Studies"[Title/Abstract]) OR "Case-Comparison Study"[Title/Abstract]) OR "Case-Compeer Studies"[Title/Abstract]) OR "Case-Referent Studies"[Title/Abstract]) OR "Case Referent Studies"[Title/Abstract]) OR "Case-Referent Study"[Title/Abstract]) OR "Case-Base Studies"[Title/Abstract]) OR "Case Base Studies"[Title/Abstract]) OR "Case Control Studies"[Title/Abstract]) OR "Case Control Study"[Title/Abstract]) OR "Nested Case-Control Studies"[Title/Abstract]) OR "Case-Control Studies, Nested"[Title/Abstract]) OR "Nested Case Control Studies"[Title/Abstract]) OR "Nested Case-Control Study"[Title/Abstract]) OR "Matched Case-Control Studies"[Title/Abstract]) OR "Matched Case Control Studies"[Title/Abstract]) OR "Matched Case-Control Study"[Title/Abstract])))) OR (((((((((((((((((((("Cohort Studies"[Mesh]) OR "Cohort Studies"[Title/Abstract]) OR "Cohort Study"[Title/Abstract]) OR "Concurrent Studies"[Title/Abstract]) OR "Concurrent Study"[Title/Abstract]) OR "Closed Cohort Studies"[Title/Abstract]) OR "Closed Cohort Study"[Title/Abstract]) OR "Cohort Analysis"[Title/Abstract]) OR "Cohort Analyses"[Title/Abstract]) OR "Historical Cohort Studies"[Title/Abstract]) OR "Historical Cohort Study"[Title/Abstract]) OR "Incidence Studies"[Title/Abstract]) OR "Incidence Study"[Title/Abstract]) OR "Cohort\*"[Title/Abstract])))) 2451208

#4 #1 and #2 and #3 **105 (search results)**



**Cochrane library:**

## ID Search

#1 (Ovarian Neoplasms):ti,ab,kw OR (Neoplasm, Ovarian):ti,ab,kw OR (Ovarian Neoplasm):ti,ab,kw OR (Ovary Neoplasms):ti,ab,kw OR (Neoplasm, Ovary):ti,ab,kw (Word variations have been searched)

#2 (Neoplasms, Ovary):ti,ab,kw OR (Ovary Neoplasm):ti,ab,kw OR (Neoplasms, Ovarian):ti,ab,kw OR (Ovary Cancer):ti,ab,kw OR (Cancer, Ovary):ti,ab,kw (Word variations have been searched)

#3 (Cancers, Ovary):ti,ab,kw OR (Ovary Cancers):ti,ab,kw OR (Ovarian Cancer):ti,ab,kw OR (Cancer, Ovarian):ti,ab,kw OR (Cancers, Ovarian):ti,ab,kw (Word variations have been searched)

#4 (Ovarian Cancers):ti,ab,kw OR (Cancer of Ovary):ti,ab,kw OR (Cancer of the Ovary):ti,ab,kw OR (Carcinoma, Ovarian Epithelial):ti,ab,kw OR (Carcinomas, Ovarian Epithelial):ti,ab,kw (Word variations have been searched)

#5 (Epithelial Carcinoma, Ovarian):ti,ab,kw OR (Epithelial Carcinomas, Ovarian):ti,ab,kw OR (Ovarian Epithelial Carcinomas):ti,ab,kw OR (Epithelial Ovarian Cancer):ti,ab,kw OR (Ovarian Epithelial Cancer):ti,ab,kw (Word variations have been searched)

#6 (Cancer, Ovarian Epithelial):ti,ab,kw OR (Cancers, Ovarian Epithelial):ti,ab,kw OR (Epithelial Cancer, Ovarian):ti,ab,kw OR (Epithelial Cancers, Ovarian):ti,ab,kw OR (Ovarian Epithelial Cancers):ti,ab,kw (Word variations have been searched)

#7 (Ovarian Cancer, Epithelial):ti,ab,kw OR (Cancer, Epithelial Ovarian):ti,ab,kw OR (Cancers, Epithelial Ovarian):ti,ab,kw OR (Epithelial Ovarian Cancers):ti,ab,kw OR (Ovarian Cancers, Epithelial):ti,ab,kw (Word variations have been searched)

#8 (Ovarian Epithelial Carcinoma):ti,ab,kw OR (Epithelial Ovarian Carcinoma):ti,ab,kw OR (Carcinoma, Epithelial Ovarian):ti,ab,kw OR (Carcinomas, Epithelial Ovarian):ti,ab,kw OR (Epithelial Ovarian Carcinomas):ti,ab,kw (Word variations have been searched)

#9 (Ovarian Carcinoma, Epithelial):ti,ab,kw OR (Ovarian Carcinomas, Epithelial):ti,ab,kw OR (ovarian carcinoma):ti,ab,kw OR (Ovar\*):ti,ab,kw (Word variations have been searched)

#10 MeSH descriptor: [Ovarian Neoplasms] explode all trees

#11 MeSH descriptor: [Carcinoma, Ovarian Epithelial] explode all trees

#12 #1 or #2 or #3 or #4 or #5 or #6 or #7 or #8 or #9 or #10 or #11 17934

#13 (Diabetes mellitus):ti,ab,kw OR (Diabetes Mellitus, Type 2):ti,ab,kw OR (Diabetes Mellitus, Noninsulin-Dependent):ti,ab,kw OR (Diabetes Mellitus, Ketosis-Resistant):ti,ab,kw OR (Diabetes Mellitus, Ketosis Resistant):ti,ab,kw (Word variations have been searched)

#14 (Ketosis-Resistant Diabetes Mellitus):ti,ab,kw OR (Diabetes Mellitus, Non Insulin Dependent):ti,ab,kw OR (Diabetes Mellitus, Non-Insulin-Dependent):ti,ab,kw OR (Non-Insulin-Dependent Diabetes Mellitus):ti,ab,kw OR (Diabetes Mellitus, Stable):ti,ab,kw (Word variations have been searched)

#15 (Stable Diabetes Mellitus):ti,ab,kw OR (Diabetes Mellitus, Type II):ti,ab,kw OR

1  
2  
3 (NIDDM):ti,ab,kw OR (Diabetes Mellitus, Noninsulin Dependent):ti,ab,kw OR  
4 (Diabetes Mellitus, Maturity-Onset):ti,ab,kw (Word variations have been searched)  
5 #16 (Diabetes Mellitus, Maturity Onset):ti,ab,kw OR (Maturity-Onset Diabetes  
6 Mellitus):ti,ab,kw OR (Maturity Onset Diabetes Mellitus):ti,ab,kw OR  
7 (MODY):ti,ab,kw OR (Diabetes Mellitus, Slow-Onset):ti,ab,kw (Word variations  
8 have been searched)  
9 #17 (Diabetes Mellitus, Slow Onset):ti,ab,kw OR (Slow-Onset Diabetes  
10 Mellitus):ti,ab,kw OR (Type 2 Diabetes Mellitus):ti,ab,kw OR  
11 (Noninsulin-Dependent Diabetes Mellitus):ti,ab,kw OR (Noninsulin Dependent  
12 Diabetes Mellitus):ti,ab,kw (Word variations have been searched)  
13 #18 (Maturity-Onset Diabetes):ti,ab,kw OR (Diabetes, Maturity-Onset):ti,ab,kw OR  
14 (Maturity Onset Diabetes):ti,ab,kw OR (Type 2 Diabetes):ti,ab,kw OR (Diabetes,  
15 Type 2):ti,ab,kw (Word variations have been searched)  
16 #19 (Diabetes Mellitus, Adult-Onset):ti,ab,kw OR (Adult-Onset Diabetes  
17 Mellitus):ti,ab,kw OR (Diabetes Mellitus, Adult Onset):ti,ab,kw OR (Diabetes  
18 Mellitus, Type 1):ti,ab,kw OR (Diabetes Mellitus, Insulin-Dependent):ti,ab,kw (Word  
19 variations have been searched)  
20 #20 (Diabetes Mellitus, Insulin Dependent):ti,ab,kw OR (Insulin-Dependent Diabetes  
21 Mellitus):ti,ab,kw OR (Diabetes Mellitus, Juvenile-Onset):ti,ab,kw OR (Diabetes  
22 Mellitus, Juvenile Onset):ti,ab,kw OR (Juvenile-Onset Diabetes Mellitus):ti,ab,kw  
23 (Word variations have been searched)  
24 #21 (IDDM):ti,ab,kw OR (Juvenile-Onset Diabetes):ti,ab,kw OR (Diabetes,  
25 Juvenile-Onset):ti,ab,kw OR (Juvenile Onset Diabetes):ti,ab,kw OR (Diabetes  
26 Mellitus, Sudden-Onset):ti,ab,kw (Word variations have been searched)  
27 #22 (Diabetes Mellitus, Sudden Onset):ti,ab,kw OR (Sudden-Onset Diabetes  
28 Mellitus):ti,ab,kw OR (Type 1 Diabetes Mellitus):ti,ab,kw OR (Diabetes Mellitus,  
29 Insulin-Dependent, 1):ti,ab,kw OR (Insulin-Dependent Diabetes Mellitus 1):ti,ab,kw  
30 (Word variations have been searched)  
31 #23 (Insulin Dependent Diabetes Mellitus 1):ti,ab,kw OR (Type 1 Diabetes):ti,ab,kw  
32 OR (Diabetes, Type 1):ti,ab,kw OR (Diabetes Mellitus, Type I):ti,ab,kw OR  
33 (Diabetes, Autoimmune):ti,ab,kw (Word variations have been searched)  
34 #24 (Autoimmune Diabetes):ti,ab,kw OR (Diabetes Mellitus, Brittle):ti,ab,kw OR  
35 (Brittle Diabetes Mellitus):ti,ab,kw OR (Diabetes Mellitus, Ketosis-Prone):ti,ab,kw  
36 OR (Diabetes Mellitus, Ketosis Prone):ti,ab,kw (Word variations have been searched)  
37 #25 (Ketosis-Prone Diabetes Mellitus):ti,ab,kw OR (Diabetes, Gestational):ti,ab,kw  
38 OR (Diabetes, Pregnancy-Induced):ti,ab,kw OR (Diabetes, Pregnancy  
39 Induced):ti,ab,kw OR (Pregnancy-Induced Diabetes):ti,ab,kw (Word variations have  
40 been searched)  
41 #26 (Gestational Diabetes):ti,ab,kw OR (Diabetes Mellitus, Gestational):ti,ab,kw OR  
42 (Gestational Diabetes Mellitus):ti,ab,kw OR (diabete):ti,ab,kw OR (diabet\*):ti,ab,kw  
43 (Word variations have been searched)  
44 #27 MeSH descriptor: [Diabetes Mellitus] explode all trees  
45 #28 MeSH descriptor: [Diabetes Mellitus, Type 2] explode all trees  
46 #29 MeSH descriptor: [Diabetes Mellitus, Type 1] explode all trees

1  
2  
3 #30 MeSH descriptor: [Diabetes, Gestational] explode all trees

4 #31 #13 or #14 or #15 or #16 or #17 or #18 or #19 or #20 or #21 or #22 or #23 or #24  
5 or #25 or #26 or #27 or #28 or #29 or #30 **89079**

6  
7  
8  
9 #32 (Cohort Studies):ti,ab,kw OR (Cohort Study):ti,ab,kw OR (Studies,  
10 Cohort):ti,ab,kw OR (Study, Cohort):ti,ab,kw OR (Concurrent Studies):ti,ab,kw  
11 (Word variations have been searched)

12 #33 (Studies, Concurrent):ti,ab,kw OR (Concurrent Study):ti,ab,kw OR (Study,  
13 Concurrent):ti,ab,kw OR (Closed Cohort Studies):ti,ab,kw OR (Cohort Studies,  
14 Closed):ti,ab,kw (Word variations have been searched)

15 #34 (Closed Cohort Study):ti,ab,kw OR (Cohort Study, Closed):ti,ab,kw OR (Study,  
16 Closed Cohort):ti,ab,kw OR (Studies, Closed Cohort):ti,ab,kw OR (Analysis,  
17 Cohort):ti,ab,kw (Word variations have been searched)

18 #35 (Cohort Analysis):ti,ab,kw OR (Analyses, Cohort):ti,ab,kw OR (Cohort  
19 Analyses):ti,ab,kw OR (Historical Cohort Studies):ti,ab,kw OR (Cohort Study,  
20 Historical):ti,ab,kw (Word variations have been searched)

21 #36 (Historical Cohort Study):ti,ab,kw OR (Study, Historical Cohort):ti,ab,kw OR  
22 (Cohort Studies, Historical):ti,ab,kw OR (Studies, Historical Cohort):ti,ab,kw OR  
23 (Incidence Studies):ti,ab,kw (Word variations have been searched)

24 #37 (Incidence Study):ti,ab,kw OR (Studies, Incidence):ti,ab,kw OR (Study,  
25 Incidence):ti,ab,kw AND (Cohort\*):ti,ab,kw (Word variations have been searched)

26 #38 MeSH descriptor: [Cohort Studies] explode all trees

27 #39 #32 or #33 or #34 or #35 or #36 or #37 or #38

28 #40 (Case-Control Studies):ti,ab,kw OR (Case-Control Study):ti,ab,kw OR (Studies,  
29 Case-Control):ti,ab,kw OR (Study, Case-Control):ti,ab,kw OR (Case-Comparison  
30 Studies):ti,ab,kw (Word variations have been searched)

31 #41 (Case Comparison Studies):ti,ab,kw OR (Case-Comparison Study):ti,ab,kw OR  
32 (Studies, Case-Comparison):ti,ab,kw OR (Study, Case-Comparison):ti,ab,kw OR  
33 (Case-Compeer Studies):ti,ab,kw (Word variations have been searched)

34 #42 (Studies, Case-Compeer):ti,ab,kw OR (Case-Referent Studies):ti,ab,kw OR  
35 (Case Referent Studies):ti,ab,kw OR (Case-Referent Study):ti,ab,kw OR (Studies,  
36 Case-Referent):ti,ab,kw (Word variations have been searched)

37 #43 (Study, Case-Referent):ti,ab,kw OR (Case-Referent Studies):ti,ab,kw OR (Case  
38 Referent Studies):ti,ab,kw OR (Case-Referent Study):ti,ab,kw OR (Studies,  
39 Case-Referent):ti,ab,kw (Word variations have been searched)

40 #44 (Study, Case-Referent):ti,ab,kw OR (Case-Base Studies):ti,ab,kw OR (Case Base  
41 Studies):ti,ab,kw OR (Studies, Case-Base):ti,ab,kw OR (Case Control  
42 Studies):ti,ab,kw (Word variations have been searched)

43 #45 (Case Control Study):ti,ab,kw OR (Studies, Case Control):ti,ab,kw OR (Study,  
44 Case Control):ti,ab,kw OR (Nested Case-Control Studies):ti,ab,kw OR (Case-Control  
45 Studies, Nested):ti,ab,kw (Word variations have been searched)

46 #46 (Case-Control Study, Nested):ti,ab,kw OR (Nested Case Control  
47 Studies):ti,ab,kw OR (Nested Case-Control Study):ti,ab,kw OR (Studies, Nested  
48 Case-Control):ti,ab,kw OR (Study, Nested Case-Control):ti,ab,kw (Word variations  
49  
50  
51  
52  
53  
54  
55  
56  
57  
58  
59  
60

1  
2  
3 have been searched)

4 #47 (Matched Case-Control Studies):ti,ab,kw OR (Case-Control Studies,  
5 Matched):ti,ab,kw OR (Case-Control Study, Matched):ti,ab,kw OR (Matched Case  
6 Control Studies):ti,ab,kw OR (Matched Case-Control Study):ti,ab,kw (Word  
7 variations have been searched)

8  
9 #48 (Study, Matched Case-Control):ti,ab,kw OR (Studies, Matched  
10 Case-Control):ti,ab,kw OR (Case-Control):ti,ab,kw OR (Case Control):ti,ab,kw  
11 (Word variations have been searched)

12 #49 MeSH descriptor: [Case-Control Studies] explode all trees

13 #50 #40 or #41 or #42 or #43 or #44 or #45 or #46 or #47 or #48 or #49 104520

14 #51 MeSH descriptor: [Observational Study] explode all trees

15 #52 (Observational Study):ti,ab,kw OR (observation\*):ti,ab,kw (Word variations have  
16 been searched)

17 #53 #51 or #52 224361

18 #54 #39 or #50 or #53 487408

19 #55 #12 and #31 and #54 **165** (search results)

1  
2  
3  
4  
5  
6  
7  
8  
9  
10  
11  
12  
13  
14  
15  
16  
17  
18  
19  
20  
21  
22  
23  
24  
25  
26  
27  
28  
29  
30  
31  
32  
33  
34  
35  
36  
37  
38  
39  
40  
41  
42  
43  
44  
45  
46  
47  
48  
49  
50  
51  
52  
53  
54  
55  
56  
57  
58  
59  
60

### Embase Session Results (9 Apr 2020) (search results: 273)

| No.   | Query Results                                                                                                                                                                                                                                                                                                                                                                                                                                                                                                                                                                                                                                            | Results   | Date          |
|-------|----------------------------------------------------------------------------------------------------------------------------------------------------------------------------------------------------------------------------------------------------------------------------------------------------------------------------------------------------------------------------------------------------------------------------------------------------------------------------------------------------------------------------------------------------------------------------------------------------------------------------------------------------------|-----------|---------------|
| #196. | #48 AND #120 AND #195                                                                                                                                                                                                                                                                                                                                                                                                                                                                                                                                                                                                                                    | 273       | 9 Apr 2020    |
| #195. | #121 OR #122 OR #123 OR #124 OR #125 OR #126 OR<br>2020<br>#127 OR #128 OR #129 OR #130 OR #131 OR #132 OR<br>#133 OR #134 OR #135 OR #136 OR #137 OR #138 OR<br>#139 OR #140 OR #141 OR #142 OR #143 OR #144 OR<br>#145 OR #146 OR #147 OR #148 OR #149 OR #150 OR<br>#151 OR #152 OR #153 OR #154 OR #155 OR #156 OR<br>#157 OR #158 OR #159 OR #160 OR #161 OR #162 OR<br>#163 OR #164 OR #165 OR #166 OR #167 OR #168 OR<br>#169 OR #170 OR #171 OR #172 OR #173 OR #174 OR<br>#175 OR #176 OR #177 OR #178 OR #179 OR #180 OR<br>#181 OR #182 OR #183 OR #184 OR #185 OR #186 OR<br>#187 OR #188 OR #189 OR #190 OR #191 OR #192 OR<br>#193 OR #194 | 1,012,386 | 9 Apr<br>2020 |
| #194. | 'cohort analysis'/exp                                                                                                                                                                                                                                                                                                                                                                                                                                                                                                                                                                                                                                    | 563,360   | 9 Apr 2020    |
| #193. | 'case control study'/exp                                                                                                                                                                                                                                                                                                                                                                                                                                                                                                                                                                                                                                 | 170,234   | 9 Apr 2020    |
| #192. | 'observational study'/exp                                                                                                                                                                                                                                                                                                                                                                                                                                                                                                                                                                                                                                | 192,953   | 9 Apr 2020    |
| #191. | 'observational study':ab,ti                                                                                                                                                                                                                                                                                                                                                                                                                                                                                                                                                                                                                              | 124,700   | 9 Apr 2020    |
| #190. | 'study, matched case-control':ab,ti                                                                                                                                                                                                                                                                                                                                                                                                                                                                                                                                                                                                                      | 6         | 9 Apr 2020    |
| #189. | 'studies, matched case-control':ab,ti                                                                                                                                                                                                                                                                                                                                                                                                                                                                                                                                                                                                                    | 2         | 9 Apr 2020    |
| #188. | 'matched case-control study':ab,ti                                                                                                                                                                                                                                                                                                                                                                                                                                                                                                                                                                                                                       | 4,504     | 9 Apr 2020    |
| #187. | 'matched case control studies':ab,ti                                                                                                                                                                                                                                                                                                                                                                                                                                                                                                                                                                                                                     | 242       | 9 Apr 2020    |
| #186. | 'case-control study, matched':ab,ti                                                                                                                                                                                                                                                                                                                                                                                                                                                                                                                                                                                                                      | 115       | 9 Apr 2020    |
| #185. | 'case-control studies, matched':ab,ti                                                                                                                                                                                                                                                                                                                                                                                                                                                                                                                                                                                                                    | 7         | 9 Apr 2020    |
| #184. | 'matched case-control studies':ab,ti                                                                                                                                                                                                                                                                                                                                                                                                                                                                                                                                                                                                                     | 242       | 9 Apr 2020    |
| #183. | 'study, nested case-control':ab,ti                                                                                                                                                                                                                                                                                                                                                                                                                                                                                                                                                                                                                       | 13        | 9 Apr 2020    |
| #182. | 'studies, nested case-control':ab,ti                                                                                                                                                                                                                                                                                                                                                                                                                                                                                                                                                                                                                     | 15        | 9 Apr 2020    |
| #181. | 'nested case-control study':ab,ti                                                                                                                                                                                                                                                                                                                                                                                                                                                                                                                                                                                                                        | 8,227     | 9 Apr 2020    |
| #180. | 'nested case control studies':ab,ti                                                                                                                                                                                                                                                                                                                                                                                                                                                                                                                                                                                                                      | 668       | 9 Apr 2020    |
| #179. | 'case-control study, nested':ab,ti                                                                                                                                                                                                                                                                                                                                                                                                                                                                                                                                                                                                                       | 1,239     | 9 Apr 2020    |
| #178. | 'case-control studies, nested':ab,ti                                                                                                                                                                                                                                                                                                                                                                                                                                                                                                                                                                                                                     | 80        | 9 Apr 2020    |
| #177. | 'nested case-control studies':ab,ti                                                                                                                                                                                                                                                                                                                                                                                                                                                                                                                                                                                                                      | 668       | 9 Apr 2020    |
| #176. | 'study, case control':ab,ti                                                                                                                                                                                                                                                                                                                                                                                                                                                                                                                                                                                                                              | 212       | 9 Apr 2020    |
| #175. | 'studies, case control':ab,ti                                                                                                                                                                                                                                                                                                                                                                                                                                                                                                                                                                                                                            | 513       | 9 Apr 2020    |
| #174. | 'case control study':ab,ti                                                                                                                                                                                                                                                                                                                                                                                                                                                                                                                                                                                                                               | 107,936   | 9 Apr 2020    |
| #173. | 'case control studies':ab,ti                                                                                                                                                                                                                                                                                                                                                                                                                                                                                                                                                                                                                             | 19,908    | 9 Apr 2020    |
| #172. | 'studies, case-base':ab,ti                                                                                                                                                                                                                                                                                                                                                                                                                                                                                                                                                                                                                               | 1         | 9 Apr 2020    |
| #171. | 'case base studies':ab,ti                                                                                                                                                                                                                                                                                                                                                                                                                                                                                                                                                                                                                                | 8         | 9 Apr 2020    |
| #170. | 'case-base studies':ab,ti                                                                                                                                                                                                                                                                                                                                                                                                                                                                                                                                                                                                                                | 8         | 9 Apr 2020    |
| #169. | 'study, case-referent':ab,ti                                                                                                                                                                                                                                                                                                                                                                                                                                                                                                                                                                                                                             | 1         | 9 Apr 2020    |

1  
2  
3  
4  
5  
6  
7  
8  
9  
10  
11  
12  
13  
14  
15  
16  
17  
18  
19  
20  
21  
22  
23  
24  
25  
26  
27  
28  
29  
30  
31  
32  
33  
34  
35  
36  
37  
38  
39  
40  
41  
42  
43  
44  
45  
46  
47  
48  
49  
50  
51  
52  
53  
54  
55  
56  
57  
58  
59  
60

|                                         |         |            |
|-----------------------------------------|---------|------------|
| #168.'studies, case-referent':ab,ti     | 1       | 9 Apr 2020 |
| #167.'case-referent study':ab,ti        | 523     | 9 Apr 2020 |
| #166.'case referent studies':ab,ti      | 84      | 9 Apr 2020 |
| #165.'case-referent studies':ab,ti      | 84      | 9 Apr 2020 |
| #164.'study, case-referent':ab,ti       | 9       | Apr 2020   |
| #163.'studies, case-referent':ab,ti     | 9       | Apr 2020   |
| #162.'case-referent study':ab,ti        | 1       | 9 Apr 2020 |
| #161.'case referent studies':ab,ti      | 9       | Apr 2020   |
| #160.'case-referent studies':ab,ti      | 9       | Apr 2020   |
| #159.'studies, case-compeer':ab,ti      | 1       | 9 Apr 2020 |
| #158.'case-compeer studies':ab,ti       | 1       | 9 Apr 2020 |
| #157.'study, case-comparison':ab,ti     | 9       | Apr 2020   |
| #156.'studies, case-comparison':ab,ti   | 9       | Apr 2020   |
| #155.'case-comparison study':ab,ti      | 215     | 9 Apr 2020 |
| #154.'case comparison studies':ab,ti    | 9       | 9 Apr 2020 |
| #153.'case-comparison studies':ab,ti    | 9       | 9 Apr 2020 |
| #152.'study, case-control':ab,ti        | 212     | 9 Apr 2020 |
| #151.'studies, case-control':ab,ti      | 513     | 9 Apr 2020 |
| #150.'case-control study':ab,ti         | 107,936 | 9 Apr 2020 |
| #149.'case-control studies':ab,ti       | 19,908  | 9 Apr 2020 |
| #148.'study, incidence':ab,ti           | 662     | 9 Apr 2020 |
| #147.'studies, incidence':ab,ti         | 140     | 9 Apr 2020 |
| #146.'incidence study':ab,ti            | 1,373   | 9 Apr 2020 |
| #145.'incidence studies':ab,ti          | 750     | 9 Apr 2020 |
| #144.'studies, historical cohort':ab,ti | 2       | 9 Apr 2020 |
| #143.'cohort studies, historical':ab,ti | 9       | Apr 2020   |
| #142.'study, historical cohort':ab,ti   | 20      | 9 Apr 2020 |
| #141.'historical cohort study':ab,ti    | 2,683   | 9 Apr 2020 |
| #140.'cohort study, historical':ab,ti   | 5       | 9 Apr 2020 |
| #139.'historical cohort studies':ab,ti  | 70      | 9 Apr 2020 |
| #138.'cohort analyses':ab,ti            | 809     | 9 Apr 2020 |
| #137.'analyses, cohort':ab,ti           | 30      | 9 Apr 2020 |
| #136.'cohort analysis':ab,ti            | 11,330  | 9 Apr 2020 |
| #135.'analysis, cohort':ab,ti           | 473     | 9 Apr 2020 |
| #134.'studies, closed cohort':ab,ti     | 9       | Apr 2020   |
| #133.'study, closed cohort':ab,ti       | 1       | 9 Apr 2020 |
| #132.'cohort study, closed':ab,ti       | 9       | Apr 2020   |
| #131.'closed cohort study':ab,ti        | 41      | 9 Apr 2020 |
| #130.'cohort studies, closed':ab,ti     | 9       | Apr 2020   |
| #129.'closed cohort studies':ab,ti      | 2       | 9 Apr 2020 |
| #128.'study, concurrent':ab,ti          | 148     | 9 Apr 2020 |
| #127.'concurrent study':ab,ti           | 239     | 9 Apr 2020 |
| #126.'studies, concurrent':ab,ti        | 46      | 9 Apr 2020 |
| #125.'concurrent studies':ab,ti         | 198     | 9 Apr 2020 |

1  
2  
3  
4  
5  
6  
7  
8  
9  
10  
11  
12  
13  
14  
15  
16  
17  
18  
19  
20  
21  
22  
23  
24  
25  
26  
27  
28  
29  
30  
31  
32  
33  
34  
35  
36  
37  
38  
39  
40  
41  
42  
43  
44  
45  
46  
47  
48  
49  
50  
51  
52  
53  
54  
55  
56  
57  
58  
59  
60

|                                                                                                                                                                                                                                                                                                                                                                                                                                                                                                             |           |            |
|-------------------------------------------------------------------------------------------------------------------------------------------------------------------------------------------------------------------------------------------------------------------------------------------------------------------------------------------------------------------------------------------------------------------------------------------------------------------------------------------------------------|-----------|------------|
| #124.'study, cohort':ab,ti                                                                                                                                                                                                                                                                                                                                                                                                                                                                                  | 21,934    | 9 Apr 2020 |
| #123.'studies, cohort':ab,ti                                                                                                                                                                                                                                                                                                                                                                                                                                                                                | 490       | 9 Apr 2020 |
| #122.'cohort study':ab,ti                                                                                                                                                                                                                                                                                                                                                                                                                                                                                   | 260,094   | 9 Apr 2020 |
| #121.'cohort studies':ab,ti                                                                                                                                                                                                                                                                                                                                                                                                                                                                                 | 31,752    | 9 Apr 2020 |
| #120.#49 OR #50 OR #51 OR #52 OR #53 OR #54 OR #55 OR<br>Apr 2020                                                                                                                                                                                                                                                                                                                                                                                                                                           | 1,047,969 | 9          |
| #56 OR #57 OR #58 OR #59 OR #60 OR #61 OR #62 OR<br>#63 OR #64 OR #65 OR #66 OR #67 OR #68 OR #69 OR<br>#70 OR #71 OR #72 OR #73 OR #74 OR #75 OR #76 OR<br>#77 OR #78 OR #79 OR #80 OR #81 OR #82 OR #83 OR<br>#84 OR #85 OR #86 OR #87 OR #88 OR #89 OR #90 OR<br>#91 OR #92 OR #93 OR #94 OR #95 OR #96 OR #97 OR<br>#98 OR #99 OR #100 OR #101 OR #102 OR #103 OR<br>#104 OR #105 OR #106 OR #107 OR #108 OR #109 OR<br>#110 OR #111 OR #112 OR #113 OR #114 OR #115 OR<br>#116 OR #117 OR #118 OR #119 |           |            |
| #119.'pregnancy diabetes mellitus'/exp                                                                                                                                                                                                                                                                                                                                                                                                                                                                      | 36,590    | 9 Apr 2020 |
| #118.'non insulin dependent diabetes mellitus'/exp                                                                                                                                                                                                                                                                                                                                                                                                                                                          | 253,232   | 9 Apr 2020 |
| #117.'insulin dependent diabetes mellitus'/exp                                                                                                                                                                                                                                                                                                                                                                                                                                                              | 117,492   | 9 Apr 2020 |
| #116.'diabetes mellitus'/exp                                                                                                                                                                                                                                                                                                                                                                                                                                                                                | 1,001,964 | 9 Apr 2020 |
| #115.'gestational diabetes mellitus':ab,ti                                                                                                                                                                                                                                                                                                                                                                                                                                                                  | 11,376    | 9 Apr 2020 |
| #114.'diabetes mellitus, gestational':ab,ti                                                                                                                                                                                                                                                                                                                                                                                                                                                                 | 91        | 9 Apr 2020 |
| #113.'gestational diabetes':ab,ti                                                                                                                                                                                                                                                                                                                                                                                                                                                                           | 22,863    | 9 Apr 2020 |
| #112.'pregnancy-induced diabetes':ab,ti                                                                                                                                                                                                                                                                                                                                                                                                                                                                     | 14        | 9 Apr 2020 |
| #111.'diabetes, pregnancy induced':ab,ti                                                                                                                                                                                                                                                                                                                                                                                                                                                                    | 57        | 9 Apr 2020 |
| #110.'diabetes, pregnancy-induced':ab,ti                                                                                                                                                                                                                                                                                                                                                                                                                                                                    | 57        | 9 Apr 2020 |
| #109.'diabetes, gestational':ab,ti                                                                                                                                                                                                                                                                                                                                                                                                                                                                          | 313       | 9 Apr 2020 |
| #108.'ketosis-prone diabetes mellitus':ab,ti                                                                                                                                                                                                                                                                                                                                                                                                                                                                | 16        | 9 Apr 2020 |
| #107.'diabetes mellitus, ketosis prone':ab,ti                                                                                                                                                                                                                                                                                                                                                                                                                                                               |           | 9 Apr 2020 |
| #106.'diabetes mellitus, ketosis-prone':ab,ti                                                                                                                                                                                                                                                                                                                                                                                                                                                               |           | 9 Apr 2020 |
| #105.'brittle diabetes mellitus':ab,ti                                                                                                                                                                                                                                                                                                                                                                                                                                                                      | 26        | 9 Apr 2020 |
| #104.'diabetes mellitus, brittle':ab,ti                                                                                                                                                                                                                                                                                                                                                                                                                                                                     | 3         | 9 Apr 2020 |
| #103.'autoimmune diabetes':ab,ti                                                                                                                                                                                                                                                                                                                                                                                                                                                                            | 4,106     | 9 Apr 2020 |
| #102.'diabetes, autoimmune':ab,ti                                                                                                                                                                                                                                                                                                                                                                                                                                                                           | 213       | 9 Apr 2020 |
| #101.'diabetes, type 1':ab,ti                                                                                                                                                                                                                                                                                                                                                                                                                                                                               | 1,452     | 9 Apr 2020 |
| #100.'type 1 diabetes':ab,ti                                                                                                                                                                                                                                                                                                                                                                                                                                                                                | 60,696    | 9 Apr 2020 |
| #99.'insulin dependent diabetes mellitus 1':ab,ti                                                                                                                                                                                                                                                                                                                                                                                                                                                           | 31        | 9 Apr 2020 |
| #98.'insulin-dependent diabetes mellitus 1':ab,ti                                                                                                                                                                                                                                                                                                                                                                                                                                                           | 31        | 9 Apr 2020 |
| #97.'diabetes mellitus, insulin-dependent, 1':ab,ti                                                                                                                                                                                                                                                                                                                                                                                                                                                         |           | 9 Apr 2020 |
| #96.'type 1 diabetes mellitus':ab,ti                                                                                                                                                                                                                                                                                                                                                                                                                                                                        | 14,962    | 9 Apr 2020 |
| #95.'sudden-onset diabetes mellitus':ab,ti                                                                                                                                                                                                                                                                                                                                                                                                                                                                  | 1         | 9 Apr 2020 |
| #94.'diabetes mellitus, sudden onset':ab,ti                                                                                                                                                                                                                                                                                                                                                                                                                                                                 | 1         | 9 Apr 2020 |
| #93.'diabetes mellitus, sudden-onset':ab,ti                                                                                                                                                                                                                                                                                                                                                                                                                                                                 | 1         | 9 Apr 2020 |
| #92.'juvenile onset diabetes':ab,ti                                                                                                                                                                                                                                                                                                                                                                                                                                                                         | 494       | 9 Apr 2020 |

|    |                                                       |                    |
|----|-------------------------------------------------------|--------------------|
| 1  |                                                       |                    |
| 2  |                                                       |                    |
| 3  |                                                       |                    |
| 4  | #91. 'diabetes, juvenile-onset':ab,ti                 | 4 9 Apr 2020       |
| 5  | #90. 'juvenile-onset diabetes':ab,ti                  | 494 9 Apr 2020     |
| 6  | #89. 'iddm':ab,ti                                     | 7,833 9 Apr 2020   |
| 7  | #88. 'juvenile-onset diabetes mellitus':ab,ti         | 232 9 Apr 2020     |
| 8  | #87. 'diabetes mellitus, juvenile onset':ab,ti        | 3 9 Apr 2020       |
| 9  | #86. 'diabetes mellitus, juvenile-onset':ab,ti        | 3 9 Apr 2020       |
| 10 | #85. 'insulin-dependent diabetes mellitus':ab,ti      | 17,759 9 Apr 2020  |
| 11 | #84. 'diabetes mellitus, insulin dependent':ab,ti     | 47 9 Apr 2020      |
| 12 | #83. 'diabetes mellitus, insulin-dependent':ab,ti     | 47 9 Apr 2020      |
| 13 | #82. 'diabetes mellitus, type 1':ab,ti                | 1,786 9 Apr 2020   |
| 14 | #81. 'diabetes mellitus, adult onset':ab,ti           | 3 9 Apr 2020       |
| 15 | #80. 'adult-onset diabetes mellitus':ab,ti            | 193 9 Apr 2020     |
| 16 | #79. 'diabetes mellitus, adult-onset':ab,ti           | 3 9 Apr 2020       |
| 17 | #78. 'diabetes, type 2':ab,ti                         | 2,279 9 Apr 2020   |
| 18 | #77. 'type 2 diabetes':ab,ti                          | 185,187 9 Apr 2020 |
| 19 | #76. 'maturity onset diabetes':ab,ti                  | 2,618 9 Apr 2020   |
| 20 | #75. 'diabetes, maturity-onset':ab,ti                 | 43 9 Apr 2020      |
| 21 | #74. 'maturity-onset diabetes':ab,ti                  | 2,618 9 Apr 2020   |
| 22 | #73. 'noninsulin dependent diabetes mellitus':ab,ti   | 1,037 9 Apr 2020   |
| 23 | #72. 'noninsulin-dependent diabetes mellitus':ab,ti   | 1,037 9 Apr 2020   |
| 24 | #71. 'type 2 diabetes mellitus':ab,ti                 | 61,709 9 Apr 2020  |
| 25 | #70. 'slow-onset diabetes mellitus':ab,ti             | 9 Apr 2020         |
| 26 | #69. 'diabetes mellitus, slow onset':ab,ti            | 1 9 Apr 2020       |
| 27 | #68. 'diabetes mellitus, slow-onset':ab,ti            | 1 9 Apr 2020       |
| 28 | #67. 'mody':ab,ti                                     | 2,136 9 Apr 2020   |
| 29 | #66. 'maturity onset diabetes mellitus':ab,ti         | 183 9 Apr 2020     |
| 30 | #65. 'maturity-onset diabetes mellitus':ab,ti         | 183 9 Apr 2020     |
| 31 | #64. 'diabetes mellitus, maturity onset':ab,ti        | 14 9 Apr 2020      |
| 32 | #63. 'diabetes mellitus, maturity-onset':ab,ti        | 14 9 Apr 2020      |
| 33 | #62. 'diabetes mellitus, noninsulin dependent':ab,ti  | 4 9 Apr 2020       |
| 34 | #61. 'niddm':ab,ti                                    | 7,991 9 Apr 2020   |
| 35 | #60. 'diabetes mellitus, type ii':ab,ti               | 1,081 9 Apr 2020   |
| 36 | #59. 'stable diabetes mellitus':ab,ti                 | 28 9 Apr 2020      |
| 37 | #58. 'diabetes mellitus, stable':ab,ti                | 16 9 Apr 2020      |
| 38 | #57. 'non-insulin-dependent diabetes mellitus':ab,ti  | 7,743 9 Apr 2020   |
| 39 | #56. 'diabetes mellitus, non-insulin-dependent':ab,ti | 40 9 Apr 2020      |
| 40 | #55. 'diabetes mellitus, non insulin dependent':ab,ti | 40 9 Apr 2020      |
| 41 | #54. 'ketosis-resistant diabetes mellitus':ab,ti      | 2 9 Apr 2020       |
| 42 | #53. 'diabetes mellitus, ketosis resistant':ab,ti     | 9 Apr 2020         |
| 43 | #52. 'diabetes mellitus, ketosis-resistant':ab,ti     | 9 Apr 2020         |
| 44 | #51. 'diabetes mellitus, noninsulin-dependent':ab,ti  | 4 9 Apr 2020       |
| 45 | #50. 'diabetes mellitus, type 2':ab,ti                | 4,600 9 Apr 2020   |
| 46 | #49. 'diabetes mellitus':ab,ti                        | 278,869 9 Apr 2020 |
| 47 | #48. #1 OR #2 OR #3 OR #4 OR #5 OR #6 OR #7 OR #8 OR  | 161,803 9 Apr 2020 |
| 48 |                                                       |                    |
| 49 |                                                       |                    |
| 50 |                                                       |                    |
| 51 |                                                       |                    |
| 52 |                                                       |                    |
| 53 |                                                       |                    |
| 54 |                                                       |                    |
| 55 |                                                       |                    |
| 56 |                                                       |                    |
| 57 |                                                       |                    |
| 58 |                                                       |                    |
| 59 |                                                       |                    |
| 60 |                                                       |                    |



1  
2  
3  
4  
5  
6  
7  
8  
9  
10  
11  
12  
13  
14  
15  
16  
17  
18  
19  
20  
21  
22  
23  
24  
25  
26  
27  
28  
29  
30  
31  
32  
33  
34  
35  
36  
37  
38  
39  
40  
41  
42  
43  
44  
45  
46  
47  
48  
49  
50  
51  
52  
53  
54  
55  
56  
57  
58  
59  
60

#9 OR #10 OR #11 OR #12 OR #13 OR #14 OR #15 OR  
 #16 OR #17 OR #18 OR #19 OR #20 OR #21 OR #22 OR  
 #23 OR #24 OR #25 OR #26 OR #27 OR #28 OR #29 OR  
 #30 OR #31 OR #32 OR #33 OR #34 OR #35 OR #36 OR  
 #37 OR #38 OR #39 OR #40 OR #41 OR #42 OR #43 OR  
 #44 OR #45 OR #46 OR #47

|                                             |         |            |
|---------------------------------------------|---------|------------|
| #47. 'ovary cancer'/exp                     | 120,100 | 9 Apr 2020 |
| #46. 'ovary tumor'/exp                      | 150,462 | 9 Apr 2020 |
| #45. 'ovary tumor':ab,ti                    | 129     | 9 Apr 2020 |
| #44. 'ovarian tumor':ab,ti                  | 7,638   | 9 Apr 2020 |
| #43. 'ovarian carcinoma':ab,ti              | 17,377  | 9 Apr 2020 |
| #42. 'ovarian carcinomas, epithelial':ab,ti | 1       | 9 Apr 2020 |
| #41. 'ovarian carcinoma, epithelial':ab,ti  | 6       | 9 Apr 2020 |
| #40. 'epithelial ovarian carcinomas':ab,ti  | 459     | 9 Apr 2020 |
| #39. 'carcinomas, epithelial ovarian':ab,ti | 2       | 9 Apr 2020 |
| #38. 'carcinoma, epithelial ovarian':ab,ti  | 6       | 9 Apr 2020 |
| #37. 'epithelial ovarian carcinoma':ab,ti   | 2,143   | 9 Apr 2020 |
| #36. 'ovarian epithelial carcinoma':ab,ti   | 290     | 9 Apr 2020 |
| #35. 'ovarian cancers, epithelial':ab,ti    | 1       | 9 Apr 2020 |
| #34. 'epithelial ovarian cancers':ab,ti     | 1,189   | 9 Apr 2020 |
| #33. 'cancers, epithelial ovarian':ab,ti    | 7       | 9 Apr 2020 |
| #32. 'cancer, epithelial ovarian':ab,ti     | 21      | 9 Apr 2020 |
| #31. 'ovarian cancer, epithelial':ab,ti     | 43      | 9 Apr 2020 |
| #30. 'ovarian epithelial cancers':ab,ti     | 100     | 9 Apr 2020 |
| #29. 'epithelial cancers, ovarian':ab,ti    | 1       | 9 Apr 2020 |
| #28. 'epithelial cancer, ovarian':ab,ti     | 4       | 9 Apr 2020 |
| #27. 'cancers, ovarian epithelial':ab,ti    | 9       | Apr 2020   |
| #26. 'cancer, ovarian epithelial':ab,ti     | 3       | 9 Apr 2020 |
| #25. 'ovarian epithelial cancer':ab,ti      | 414     | 9 Apr 2020 |
| #24. 'epithelial ovarian cancer':ab,ti      | 13,087  | 9 Apr 2020 |
| #23. 'ovarian epithelial carcinomas':ab,ti  | 84      | 9 Apr 2020 |
| #22. 'epithelial carcinomas, ovarian':ab,ti | 9       | Apr 2020   |
| #21. 'epithelial carcinoma, ovarian':ab,ti  | 1       | 9 Apr 2020 |
| #20. 'carcinomas, ovarian epithelial':ab,ti | 1       | 9 Apr 2020 |
| #19. 'carcinoma, ovarian epithelial':ab,ti  | 2       | 9 Apr 2020 |
| #18. 'cancer of the ovary':ab,ti            | 735     | 9 Apr 2020 |
| #17. 'cancer of ovary':ab,ti                | 32      | 9 Apr 2020 |
| #16. 'ovarian cancers':ab,ti                | 8,913   | 9 Apr 2020 |
| #15. 'cancers, ovarian':ab,ti               | 139     | 9 Apr 2020 |
| #14. 'cancer, ovarian':ab,ti                | 1,121   | 9 Apr 2020 |
| #13. 'ovarian cancer':ab,ti                 | 76,611  | 9 Apr 2020 |
| #12. 'ovary cancers':ab,ti                  | 89      | 9 Apr 2020 |
| #11. 'cancers, ovary':ab,ti                 | 12      | 9 Apr 2020 |
| #10. 'cancer, ovary':ab,ti                  | 65      | 9 Apr 2020 |

|    |     |                            |                  |
|----|-----|----------------------------|------------------|
| 1  |     |                            |                  |
| 2  |     |                            |                  |
| 3  |     |                            |                  |
| 4  | #9. | 'ovary cancer':ab,ti       | 595 9 Apr 2020   |
| 5  | #8. | 'neoplasms, ovarian':ab,ti | 23 9 Apr 2020    |
| 6  | #7. | 'ovary neoplasm':ab,ti     | 7 9 Apr 2020     |
| 7  | #6. | 'neoplasms, ovary':ab,ti   | 5 9 Apr 2020     |
| 8  | #5. | 'neoplasm, ovary':ab,ti    | 2 9 Apr 2020     |
| 9  | #4. | 'ovarian neoplasm':ab,ti   | 760 9 Apr 2020   |
| 10 | #3. | 'ovary neoplasms':ab,ti    | 14 9 Apr 2020    |
| 11 | #2. | 'neoplasm, ovarian':ab,ti  | 13 9 Apr 2020    |
| 12 | #1. | 'ovarian neoplasms':ab,ti  | 1,859 9 Apr 2020 |
| 13 |     |                            |                  |
| 14 |     |                            |                  |
| 15 |     |                            |                  |
| 16 |     |                            |                  |
| 17 |     |                            |                  |
| 18 |     |                            |                  |
| 19 |     |                            |                  |
| 20 |     |                            |                  |
| 21 |     |                            |                  |
| 22 |     |                            |                  |
| 23 |     |                            |                  |
| 24 |     |                            |                  |
| 25 |     |                            |                  |
| 26 |     |                            |                  |
| 27 |     |                            |                  |
| 28 |     |                            |                  |
| 29 |     |                            |                  |
| 30 |     |                            |                  |
| 31 |     |                            |                  |
| 32 |     |                            |                  |
| 33 |     |                            |                  |
| 34 |     |                            |                  |
| 35 |     |                            |                  |
| 36 |     |                            |                  |
| 37 |     |                            |                  |
| 38 |     |                            |                  |
| 39 |     |                            |                  |
| 40 |     |                            |                  |
| 41 |     |                            |                  |
| 42 |     |                            |                  |
| 43 |     |                            |                  |
| 44 |     |                            |                  |
| 45 |     |                            |                  |
| 46 |     |                            |                  |
| 47 |     |                            |                  |
| 48 |     |                            |                  |
| 49 |     |                            |                  |
| 50 |     |                            |                  |
| 51 |     |                            |                  |
| 52 |     |                            |                  |
| 53 |     |                            |                  |
| 54 |     |                            |                  |
| 55 |     |                            |                  |
| 56 |     |                            |                  |
| 57 |     |                            |                  |
| 58 |     |                            |                  |
| 59 |     |                            |                  |
| 60 |     |                            |                  |

For peer review only

Quality assessment of included studies based on the Newcastle-Ottawa Scale score

Cohort studies

| Study ID        | Representativeness of the exposed cohort | Selection of the non-exposed cohort | Ascertainment of exposure | Demonstration that outcome of interest was not present at start of study | Comparability of cohorts on the basis of the design or analysis <sup>∞</sup> | Assessment of outcome | Was follow-up long enough for outcomes to occur | Adequacy of follow-up of cohorts | Total stars |
|-----------------|------------------------------------------|-------------------------------------|---------------------------|--------------------------------------------------------------------------|------------------------------------------------------------------------------|-----------------------|-------------------------------------------------|----------------------------------|-------------|
| Weiderpass 2002 | ★                                        | ★                                   | ★                         | ★                                                                        | ★                                                                            | ★                     | ★                                               | ★                                | 8           |
| Zendejdel 2003  | ★                                        | ★                                   | ★                         | ★                                                                        | ★                                                                            | ★                     | ★                                               | ...                              | 7           |
| Swerdlow 2005   | ★                                        | ★                                   | ★                         | ...                                                                      | ★                                                                            | ★                     | ★                                               | ★                                | 7           |
| Inoue 2006      | ★                                        | ★                                   | ★                         | ★                                                                        | ★                                                                            | ★                     | ★                                               | ★                                | 8           |
| Khan 2006       | ★                                        | ★                                   | ★                         | ★                                                                        | ★                                                                            | ★                     | ...                                             | ★                                | 7           |
| Hemminki 2010   | ★                                        | ★                                   | ★                         | ★                                                                        | ★                                                                            | ★                     | ★                                               | ...                              | 7           |
| Chodick 2010    | ★                                        | ★                                   | ★                         | ★                                                                        | ★                                                                            | ★                     | ...                                             | ★                                | 7           |
| Shu 2010        | ★                                        | ★                                   | ★                         | ★                                                                        | ★                                                                            | ★                     | ★                                               | ★                                | 8           |
| Wotton 2011     | ...                                      | ★                                   | ★                         | ★                                                                        | ★                                                                            | ★                     | ★                                               | ★                                | 7           |
| Johnson 2011    | ★                                        | ★                                   | ★                         | ★                                                                        | ★                                                                            | ★                     | ...                                             | ★                                | 7           |
| Lambe 2011      | ★                                        | ★                                   | ★                         | ★                                                                        | ★                                                                            | ★                     | ★                                               | ★                                | 8           |
| Gapstur 2012    | ★                                        | ★                                   | ★                         | ★                                                                        | ★                                                                            | ★                     | ...                                             | ★                                | 7           |
| Lo 2013         | ★                                        | ★                                   | ★                         | ★                                                                        | ★                                                                            | ★                     | ...                                             | ★                                | 7           |
| Chen 2014       | ★                                        | ★                                   | ★                         | ★                                                                        | ★★                                                                           | ★                     | ★                                               | ★                                | 9           |
| Hsu 2015        | ★                                        | ★                                   | ★                         | ★                                                                        | ★                                                                            | ★                     | ...                                             | ★                                | 7           |

|                                 |     |   |   |     |     |   |     |     |   |
|---------------------------------|-----|---|---|-----|-----|---|-----|-----|---|
| Harding 2015                    | ★   | ★ | ★ | ★   | ... | ★ | ★   | ★   | 7 |
| Dankner 2016                    | ★   | ★ | ★ | ★   | ★   | ★ | ★   | ★   | 8 |
| Carstensen 2016                 | ★   | ★ | ★ | ★   | ★   | ★ | ★   | ... | 7 |
| Fuchs 2017                      | ★   | ★ | ★ | ★   | ... | ★ | ★   | ★   | 7 |
| Ballotari 2017                  | ★   | ★ | ★ | ... | ★   | ★ | ★   | ... | 6 |
| He 2018                         | ★   | ★ | ★ | ★   | ★   | ★ | ... | ★   | 7 |
| Han 2018                        | ★   | ★ | ★ | ★   | ★   | ★ | ★   | ★   | 8 |
| Bao 2018                        | ... | ★ | ★ | ★   | ★   | ★ | ... | ★   | 6 |
| Saarela 2019                    | ★   | ★ | ★ | ★   | ... | ★ | ★   | ... | 6 |
| Linkeviciute-Ulinskiene<br>2019 | ★   | ★ | ★ | ★   | ... | ★ | ★   | ★   | 7 |
| Peng 2019                       | ★   | ★ | ★ | ★   | ★   | ★ | ... | ★   | 7 |
| Pace 2020                       | ★   | ★ | ★ | ★   | ★   | ★ | ★   | ... | 7 |

1  
2  
3  
4  
5  
6  
7  
8  
9  
10  
11  
12  
13  
14  
15  
16  
17  
18  
19  
20  
21  
22  
23  
24  
25  
26  
27  
28  
29  
30  
31  
32  
33  
34  
35  
36  
37  
38  
39  
40  
41  
42  
43  
44  
45  
46

**Case-control studies**

| Study ID       | Is the case definition adequate | Representativeness of the cases | Selection of the controls | Definition of controls | Comparability of cases and controls on the basis of the design or analysis | Ascertainment of exposure | Same method of ascertainment for cases and controls | Non-response rate | Total stars |
|----------------|---------------------------------|---------------------------------|---------------------------|------------------------|----------------------------------------------------------------------------|---------------------------|-----------------------------------------------------|-------------------|-------------|
| O'Mara 1985    | ★                               | ★                               | ...                       | ★                      | ★                                                                          | ...                       | ★                                                   | ...               | 5           |
| Adler 1996     | ★                               | ★                               | ★                         | ...                    | ...                                                                        | ★                         | ★                                                   | ...               | 5           |
| Parazzini 1997 | ★                               | ★                               | ...                       | ★                      | ★                                                                          | ...                       | ★                                                   | ...               | 5           |
| Mori 1998      | ★                               | ★                               | ★                         | ★                      | ★                                                                          | ...                       | ★                                                   | ★                 | 7           |
| Kuriki 2007    | ★                               | ★                               | ★                         | ...                    | ...                                                                        | ★                         | ★                                                   | ★                 | 6           |
| Reis 2010      | ★                               | ★                               | ...                       | ★                      | ...                                                                        | ★                         | ★                                                   | ★                 | 6           |
| Attner 2012    | ★                               | ★                               | ★                         | ★                      | ★                                                                          | ★                         | ★                                                   | ...               | 7           |
| Bosetti 2012   | ★                               | ★                               | ...                       | ★                      | ★                                                                          | ...                       | ★                                                   | ...               | 5           |
| Ruiz 2016      | ★                               | ★                               | ...                       | ★                      | ★                                                                          | ...                       | ★                                                   | ...               | 5           |

One star is awarded if matched on, or adjusted for maternal age; another star is awarded if other confounders are taken into account.

Sensitivity analysis

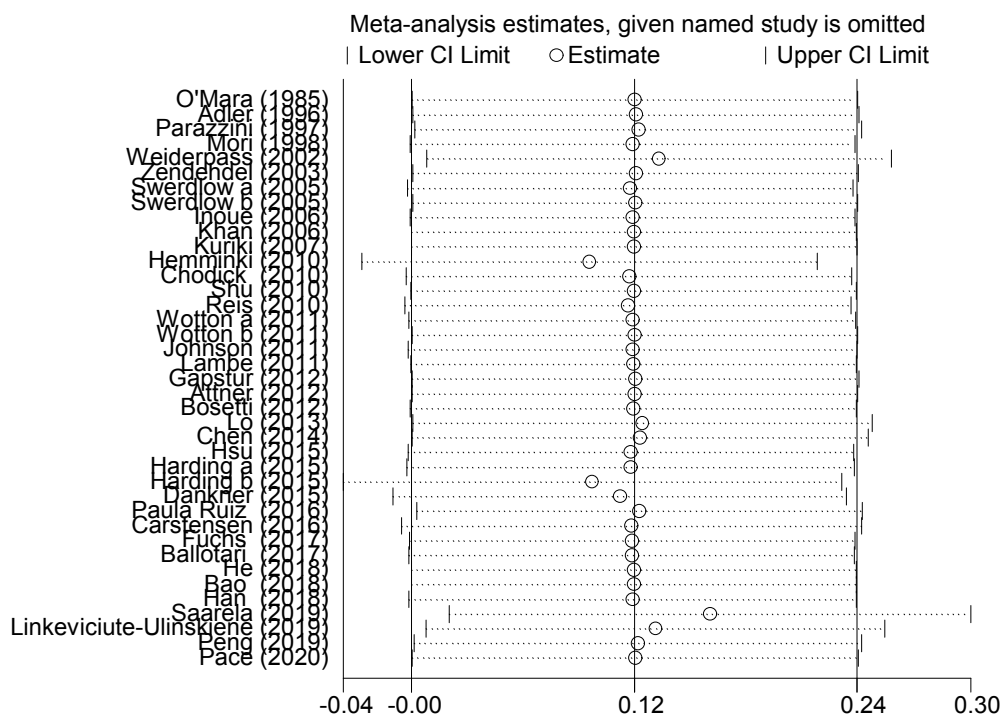

Assessment of reporting biases

Funnel plot

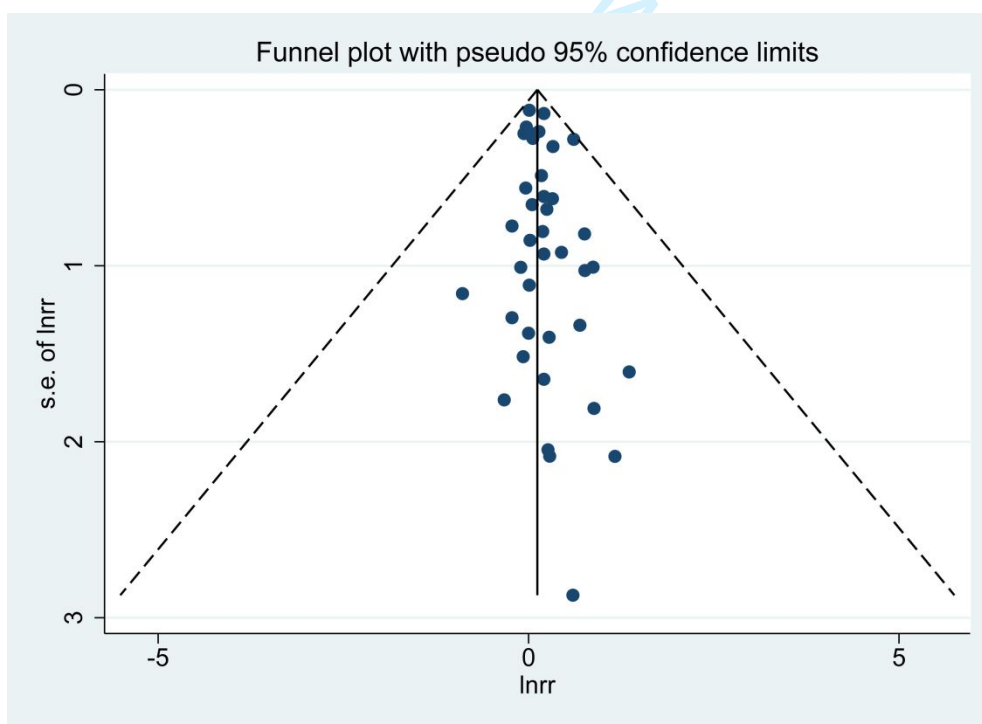

**Begg's Test**

## Begg's Test

adj. Kendall's Score (P-Q) = 97  
 Std. Dev. of Score = 82.67  
 Number of Studies = 39  
 z = 1.17  
 Pr > |z| = 0.241  
 z = 1.16 (continuity corrected)  
 Pr > |z| = 0.246 (continuity corrected)

**Egger's test**

| Std_Eff | Coef.    | Std. Err. | t    | P> t  | [95% Conf. Interval] |          |
|---------|----------|-----------|------|-------|----------------------|----------|
| slope   | .0705791 | .0441485  | 1.60 | 0.118 | -.0188741            | .1600324 |
| bias    | .6885655 | .4468107  | 1.54 | 0.132 | -.2167589            | 1.59389  |

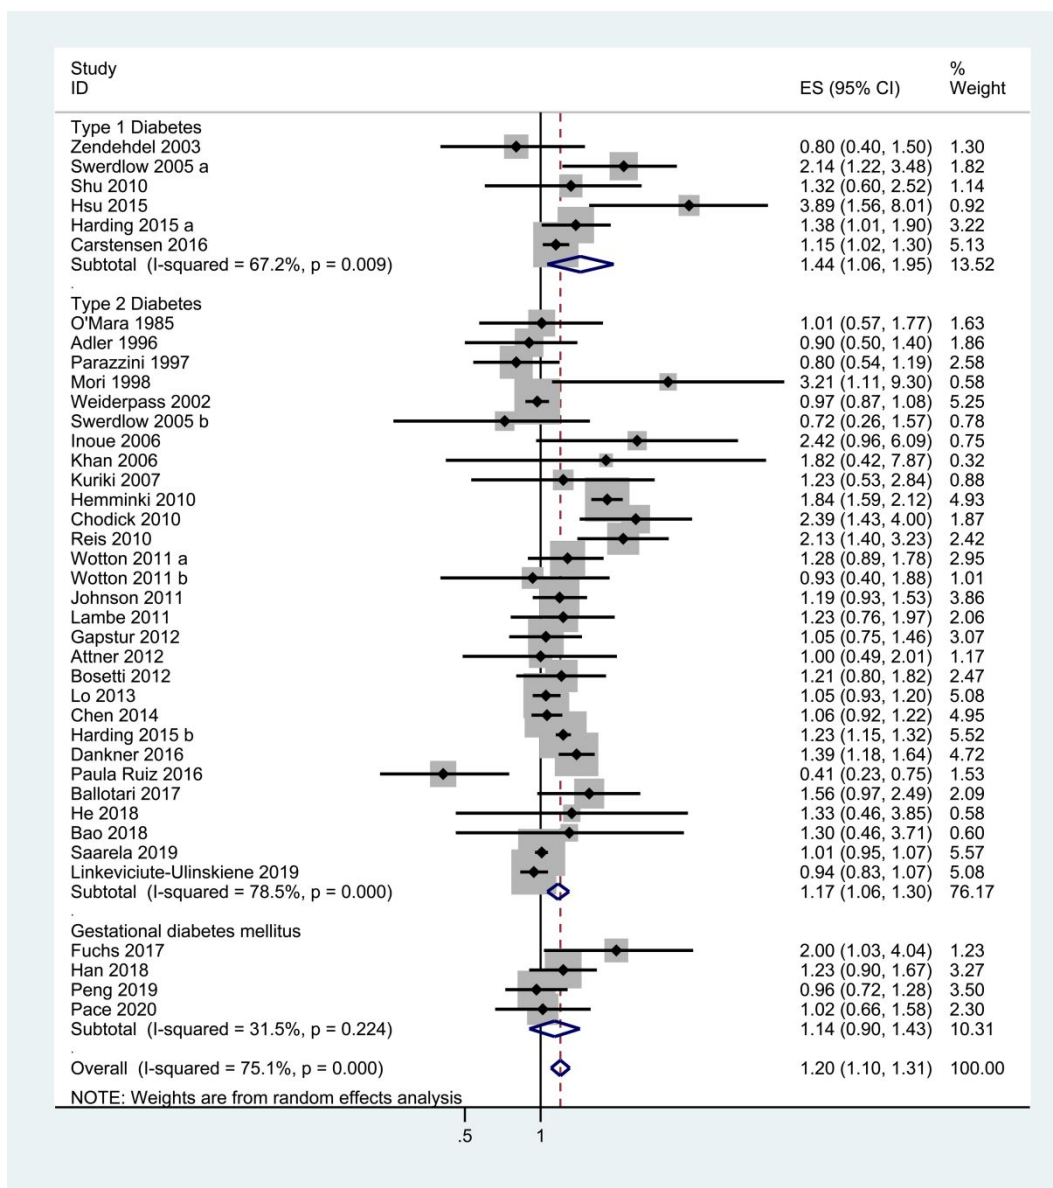

a. Subgroup analysis based on the DM types (type 1 DM vs. type 2 DM vs. GDM). RR relative risk, CI confidence interval, DM diabetes mellitus, GDM gestational DM.



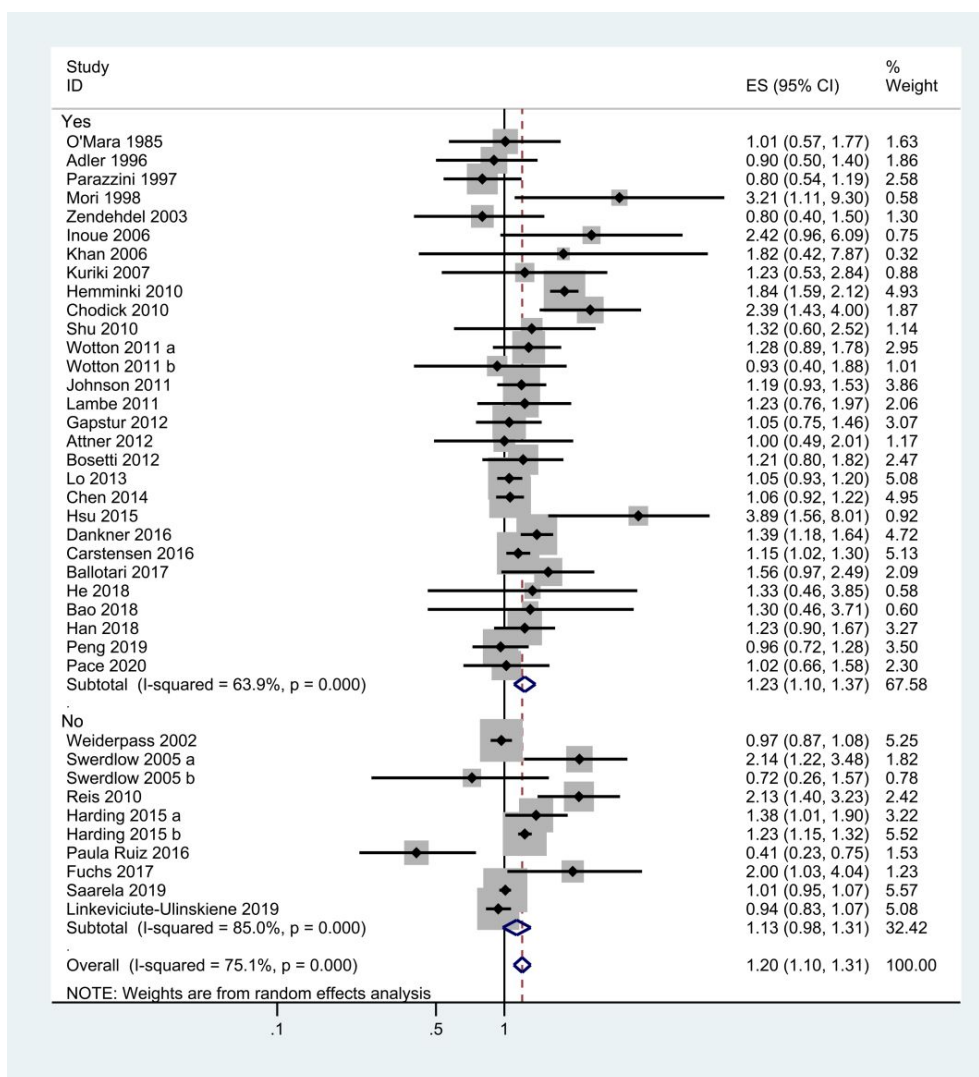

b. Subgroup analysis based on the level of adjustment (unadjusted vs. adjusted). RR relative risk, CI confidence interval.

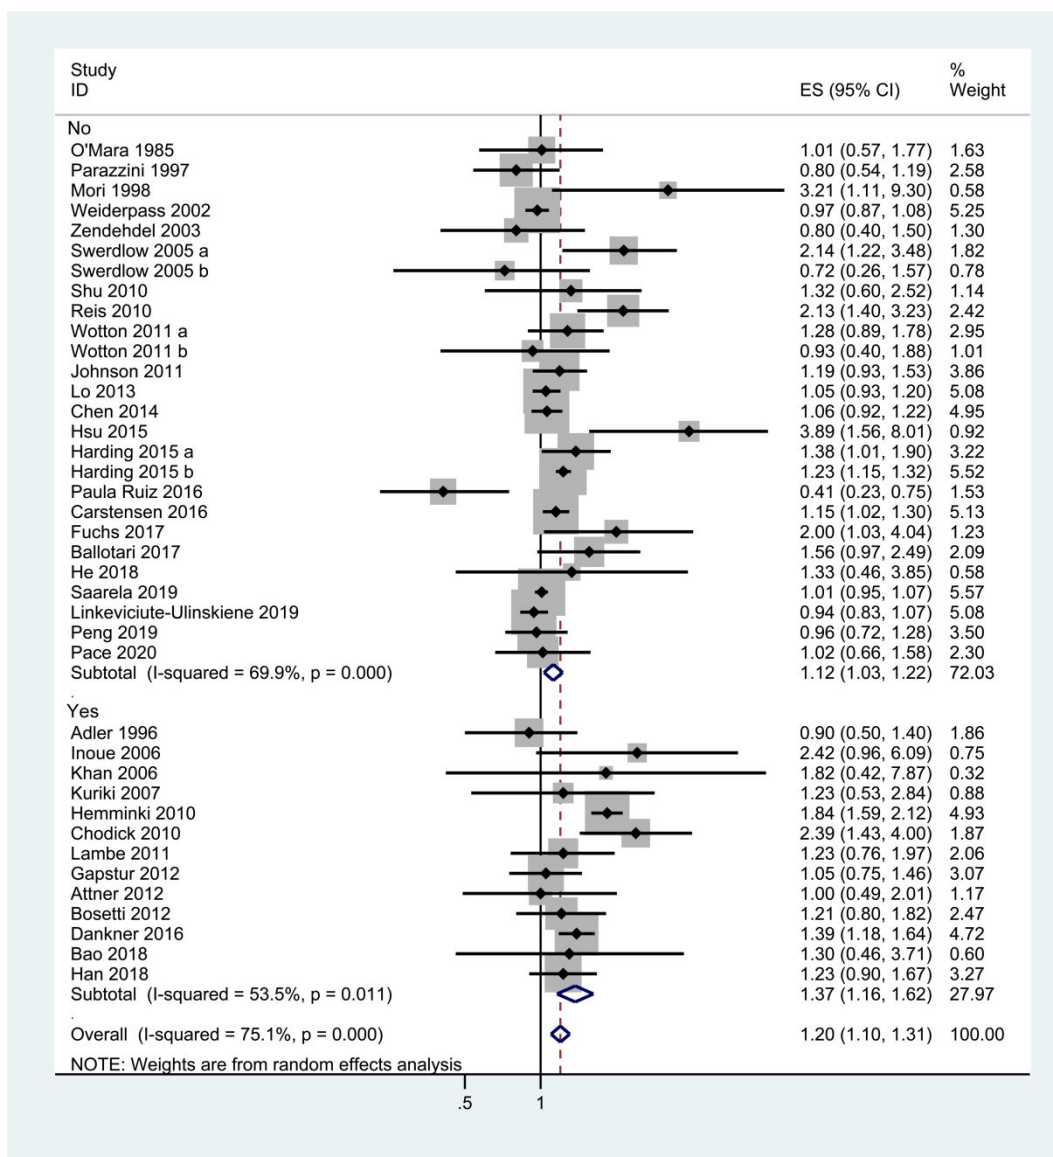

c. Subgroup analysis based on whether the study adjusted for BMI (yes vs. no). RR relative risk, CI confidence interval, BMI body mass index.

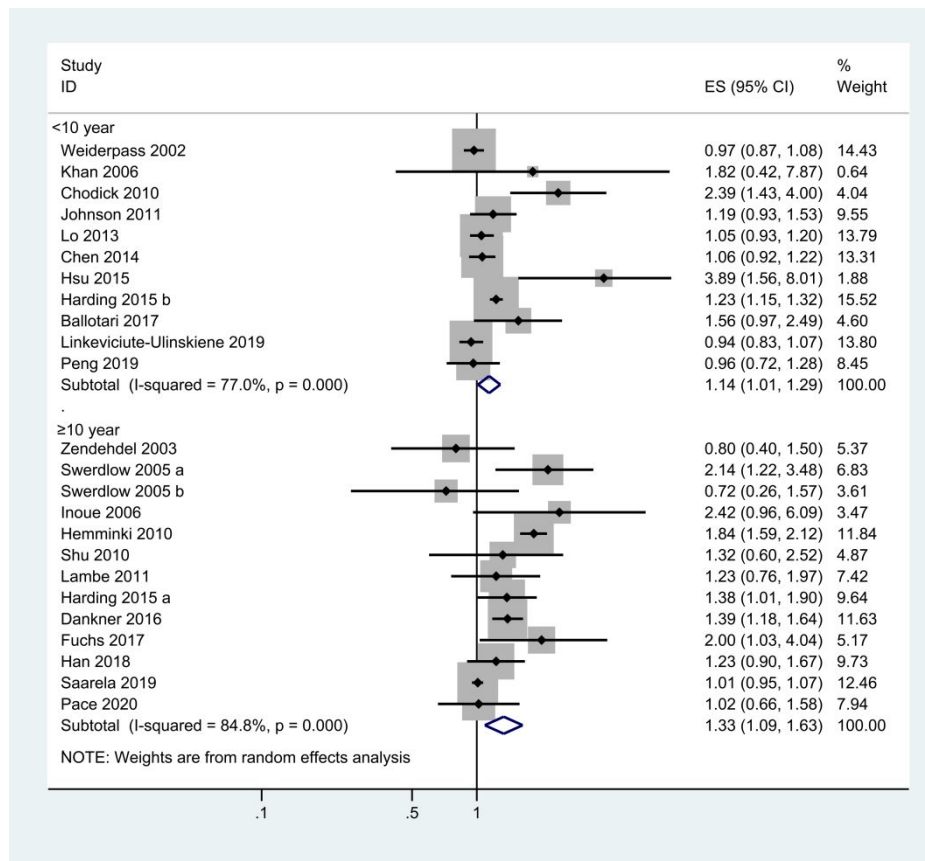

d. Subgroup analysis based on the duration of follow-up (<10 year vs.  $\geq 10$  year).  
RR relative risk, CI confidence interval.

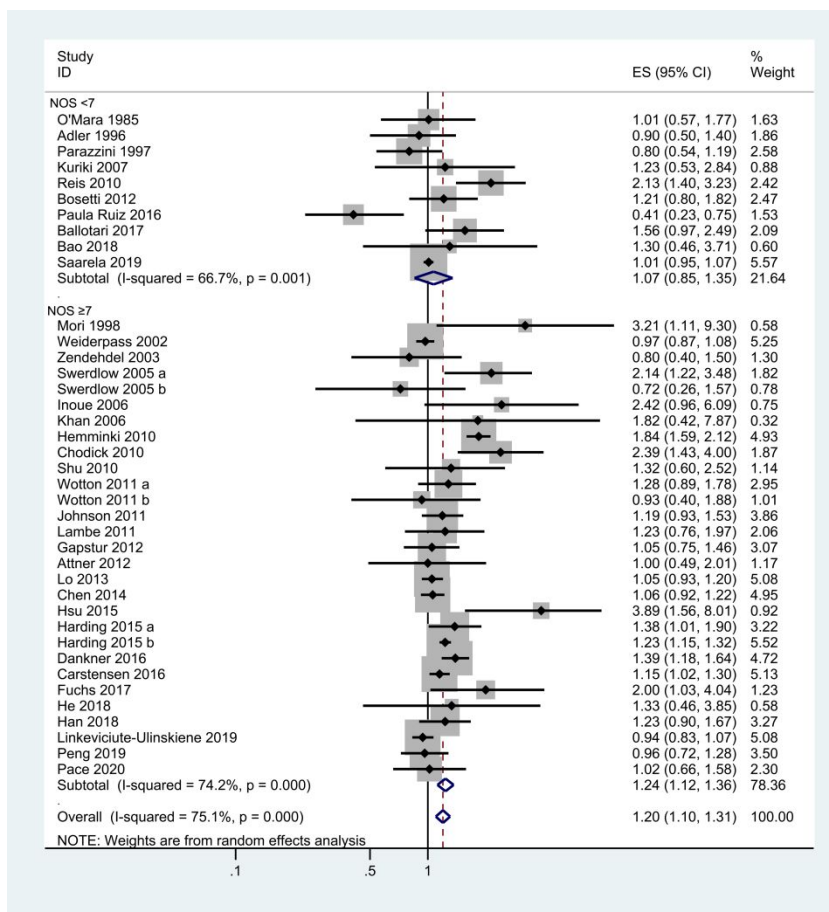

e. Subgroup analysis based on the study quality (NOS <7 vs. ≥7 points). RR relative risk, CI confidence interval, NOS the Newcastle-Ottawa Scale score.

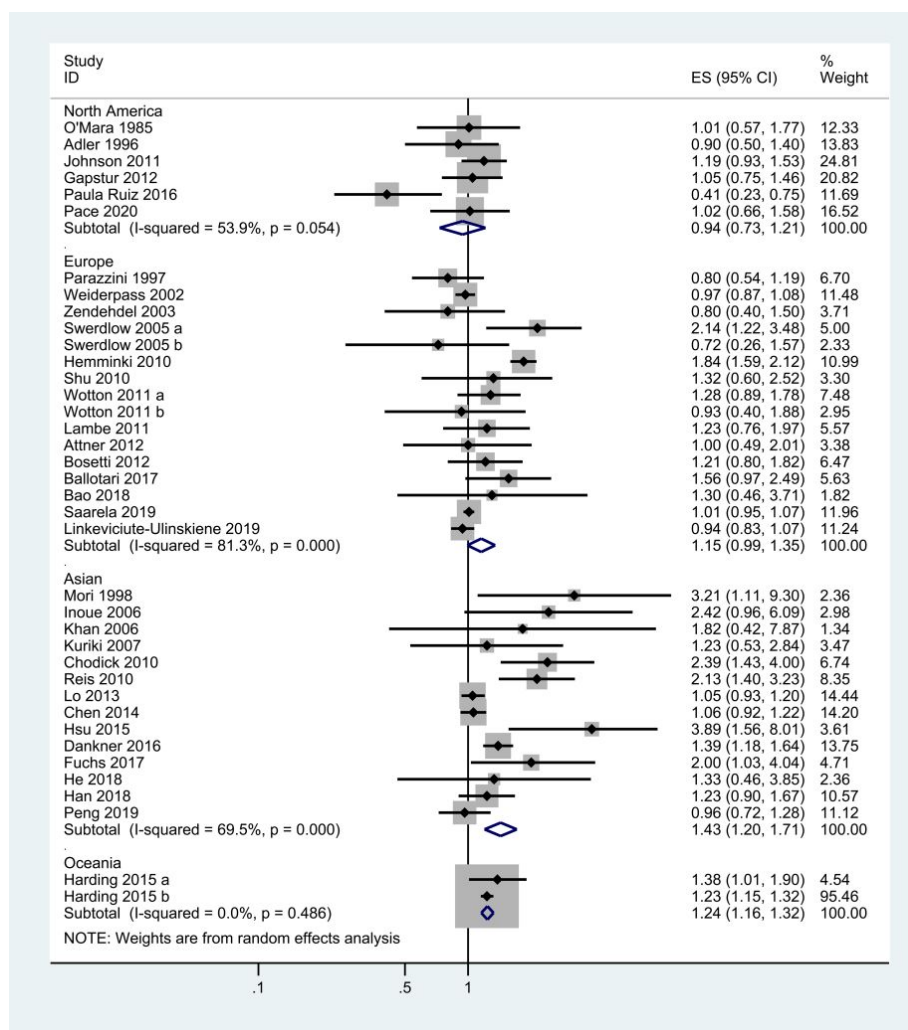

f. Subgroup analysis based on the geographic areas (North America vs. Europe vs. Asian vs. Oceania). RR relative risk, CI confidence interval.

# BMJ Open

## Diabetes mellitus and the risk of ovarian cancer – a systematic review and meta-analysis of cohort and case-control studies

|                                 |                                                                                                                                                                                                                                                                                                                             |
|---------------------------------|-----------------------------------------------------------------------------------------------------------------------------------------------------------------------------------------------------------------------------------------------------------------------------------------------------------------------------|
| Journal:                        | <i>BMJ Open</i>                                                                                                                                                                                                                                                                                                             |
| Manuscript ID                   | bmjopen-2020-040137.R1                                                                                                                                                                                                                                                                                                      |
| Article Type:                   | Original research                                                                                                                                                                                                                                                                                                           |
| Date Submitted by the Author:   | 05-Oct-2020                                                                                                                                                                                                                                                                                                                 |
| Complete List of Authors:       | Wang, Li; Huzhou Central Hospital, Obstetrics and Gynecology<br>Zhong, Lei; Huzhou Central Hospital, Intensive Care Unit<br>Xu, Bin; Huzhou Central Hospital, Obstetrics and Gynecology<br>Chen, Min; Huzhou Central Hospital, Obstetrics and Gynecology<br>Huang, Hong; Huzhou Central Hospital, Obstetrics and Gynecology |
| <b>Primary Subject Heading</b>: | Obstetrics and gynaecology                                                                                                                                                                                                                                                                                                  |
| Secondary Subject Heading:      | Obstetrics and gynaecology, Diabetes and endocrinology, Evidence based practice                                                                                                                                                                                                                                             |
| Keywords:                       | Diabetes & endocrinology < INTERNAL MEDICINE, Gynaecological oncology < GYNAECOLOGY, Adult oncology < ONCOLOGY                                                                                                                                                                                                              |
|                                 |                                                                                                                                                                                                                                                                                                                             |

SCHOLARONE™  
Manuscripts



I, the Submitting Author has the right to grant and does grant on behalf of all authors of the Work (as defined in the below author licence), an exclusive licence and/or a non-exclusive licence for contributions from authors who are: i) UK Crown employees; ii) where BMJ has agreed a CC-BY licence shall apply, and/or iii) in accordance with the terms applicable for US Federal Government officers or employees acting as part of their official duties; on a worldwide, perpetual, irrevocable, royalty-free basis to BMJ Publishing Group Ltd ("BMJ") its licensees and where the relevant Journal is co-owned by BMJ to the co-owners of the Journal, to publish the Work in this journal and any other BMJ products and to exploit all rights, as set out in our [licence](#).

The Submitting Author accepts and understands that any supply made under these terms is made by BMJ to the Submitting Author unless you are acting as an employee on behalf of your employer or a postgraduate student of an affiliated institution which is paying any applicable article publishing charge ("APC") for Open Access articles. Where the Submitting Author wishes to make the Work available on an Open Access basis (and intends to pay the relevant APC), the terms of reuse of such Open Access shall be governed by a Creative Commons licence – details of these licences and which [Creative Commons](#) licence will apply to this Work are set out in our licence referred to above.

Other than as permitted in any relevant BMJ Author's Self Archiving Policies, I confirm this Work has not been accepted for publication elsewhere, is not being considered for publication elsewhere and does not duplicate material already published. I confirm all authors consent to publication of this Work and authorise the granting of this licence.

1  
2  
3 **Diabetes mellitus and the risk of ovarian cancer**  
4 **– a systematic review and meta-analysis of cohort and case-control studies**  
5  
6

7 Lihai Wang MM<sup>1</sup>, Lei Zhong MM<sup>2</sup>,  
8 Bin Xu MM<sup>1</sup>, Min Chen BN<sup>1</sup>, Hongxiao Huang MM<sup>1</sup>  
9  
10

11  
12 **Corresponding author:**

13 Hongxiao Huang, M.M.

14 Department of Obstetrics and Gynecology, Huzhou Cent Hosp, Affiliated Cent Hosp  
15 HuZhou University, 198 Hongqi Rd, Huzhou 313000, Zhejiang, Peoples R China.

16 Phone: 13957256957

17 Email: perfectog@163.com;  
18  
19  
20  
21  
22

23 **Lihai Wang (first author):** Department of Obstetrics and Gynecology, Huzhou Cent  
24 Hosp, Affiliated Cent Hosp HuZhou University, Huzhou 313000, Zhejiang, Peoples R  
25 China. whloggroup@163.com;

26 **Lei Zhong:** Department of Intensive Care Unit, Huzhou Cent Hosp, Affiliated Cent  
27 Hosp HuZhou University, Huzhou 313000, Zhejiang, Peoples R China.  
28 [perfecticu@163.com](mailto:perfecticu@163.com);

29 **Bin Xu:** Department of Obstetrics and Gynecology, Huzhou Cent Hosp, Affiliated  
30 Cent Hosp HuZhou University, Huzhou 313000, Zhejiang, Peoples R China;  
31 [xb-flower@yeah.net](mailto:xb-flower@yeah.net);

32 **Min Chen:** Department of Obstetrics and Gynecology, Huzhou Cent Hosp, Affiliated  
33 Cent Hosp HuZhou University, Huzhou 313000, Zhejiang, Peoples R China;  
34 [2645538450@qq.com](mailto:2645538450@qq.com).  
35  
36  
37  
38  
39  
40

41 **ABSTRACT**

42 **Objective** Emerging evidence from observational studies (cohort and case-control  
43 studies) suggests that a history of diabetes mellitus (DM) has been linked to increased  
44 risk of ovarian cancer (OC), but the association between them remains inconclusive.  
45 The aim of this systematic review and meta-analysis of observational studies was to  
46 clarify this association.  
47

48 **Design** Systematic review and meta- analysis.

49 **Methods** We searched PubMed, Embase and the Cochrane library databases  
50 published from the inception through 9 April 2020 without language restriction.  
51 Observational studies that evaluated the correlation between DM and the incidence of  
52 OC were included in our study. Relative risk (RR) with 95% confidence interval (CI)  
53 were pooled by use of a random-effects model.  
54

55 **Results** A total of 36 epidemiological articles, including 9 case-control and 27  
56 cohort studies, were finally enrolled, consisting of 14,496 incident cases of OC.  
57 Synthesized RR of developing OC by history of DM was 1.20 (1.10,1.31) for all  
58  
59  
60



1  
2  
3 eligible studies, 1.08 (0.77,1.53) for case-control studies and 1.22 (1.11,1.33) for  
4 cohort studies. The above-mentioned positive association persisted across most of  
5 subgroup analyses, whereas it was not significant among studies from North America  
6 and Europe countries, level of unadjusted, low-quality and gestational DM patients  
7 group. The cumulative meta-analysis and sensitivity analysis showed pooled effect  
8 was stable and reliable, and no apparent publication bias was identified in this study.  
9

10  
11 **Conclusions** Our study found weaker but still association between DM and OC risk.  
12 However, further well-designed prospective studies that control for potential  
13 confounders are warranted.  
14

### 15 16 **Strengths and limitations of this study**

- 17 ▶ Largest systematic review and meta-analysis examining diabetes mellitus (DM) and  
18 the risk of ovarian cancer (OC).
- 19 ▶ We also investigated the link between type 1 DM, type 2 DM or GDM and OC risk,  
20 respectively, which might be more generalizable than previous published meta-analyses.  
21
- 22 ▶ The sensitivity analysis and cumulative meta-analysis showed pooled effect was stable and reliable, and no apparent publication bias was identified in our study.
- 23
- 24 ▶ Substantial heterogeneity was observed among these studies.  
25  
26  
27  
28  
29  
30  
31  
32  
33  
34  
35  
36  
37  
38  
39  
40  
41  
42  
43  
44  
45  
46  
47  
48  
49  
50  
51  
52  
53  
54  
55  
56  
57  
58  
59  
60

## INTRODUCTION

Diabetes mellitus (DM), characterized as hyperglycemia, is a rock-ribbed and costly chronic ailment metabolic disease,<sup>1</sup> dividing into four different subtypes—type 1 DM (T1DM), type 2 DM (T2DM), gestational diabetes mellitus (GDM) and other specific categories of diabetes.<sup>2</sup> The International Diabetes Federation report of 2017 has estimated that the number of DM will reach approximately 693 million (9.9%) by 2045, up over 1.5-fold from 451 million (8.4%) in 2017 among adults aged 18–99 years in worldwide.<sup>3</sup> That is, the number of DM will continue to rise due to the increasing population ageing and prevalence of rising obesity, recognized as a global public health issue challenge of the 21st century across the world.<sup>4 5</sup>

Ovarian cancer (OC), as a leading cause of death in women with gynecological malignancy, is the fifth leading cause of carcinoma-related death in women, with a 5-year survival rate varying from 30 to 40%.<sup>6 7</sup> The Global Cancer Observatory predicted that in 2018 there are 295,414 people with OC and the incidence of this disease in the worldwide increased by 47% in 2040 estimates (434,184).<sup>8</sup> Furthermore, in the last 30 years, the cure rate for OC has barely budged.<sup>9</sup>

Too well known, the ovary disease, which is located deep in the pelvic cavity, lacks early identifiable clinical symptoms, specific laboratory indicators as well as effective screening strategies, making early lesions difficult to detect.<sup>10</sup> Therefore, the majority of patients are already diagnosed in an advanced stage owing to the insidious onset of OC.<sup>11 12</sup> Early identification and intervention is of vital significance in controlling cancer, especially for OC, unfortunately, few modifiable risk factors for this cancer are well documented such as smoking, hormonal replacement therapy and dietary factors etc.<sup>13 14</sup> Besides, other immutable risk factors included age of menarche, age of natural menopause and endometriosis, etc.<sup>13</sup>

In recent years, the causal relationship between DM and cancer risk has been widely concerned in cancer prevention research. Accumulating lines of evidence have demonstrated that DM are associated with greater risk of certain types of cancer at multiple sites, such as pancreatic, liver, endometrium cancer, etc.<sup>15-20</sup> Nonetheless, the relationship between DM and the observed excess risk of cancer may be a result of confounding factors such as age, obesity, physical activity, exogenous insulin therapy, etc.<sup>15 21 22</sup>

In recent decades, there are several epidemiological observational studies in this area since the first study investigating the association between DM and subsequent risk of OC in women was published. Several cohort studies<sup>23-26</sup> and case-control<sup>27</sup> have been reported that a history of DM is associated with an augmented risk of OC, however, other relevant studies found a negative significant association.<sup>28-31</sup> Because obesity or high body mass index (BMI) has been regarded as a risk factor for both DM and OC, it remains unclear as to whether or not DM is associated with an increased OC risk on account of confounding by this factor. Studies in recent years have shown that DM may be closely related to OC, but epidemiological findings between them are remains open to discussion.

In view of these conflicting results, we decided to update a meta-analysis of case-control and cohort studies to clarify whether there is an association between DM

1  
2  
3 and OC risk in women.  
4  
5

## 6 **METHODS**

7 This meta-analysis was performed and reported based on the meta-analysis of  
8 observational studies in epidemiology (MOOSE) protocol checklist<sup>32</sup> and preferred  
9 reporting items for systematic reviews and meta-analyses (PRISMA) guidelines<sup>33</sup>  
10 (Additional file 1).  
11  
12

### 13 **Patient and public involvement**

14 Since our meta-analysis is based on previous published researches, patient and  
15 public involvement are not required.  
16  
17  
18

### 19 **Search Strategy and Selection Criteria**

20 Online databases, such as PubMed, Embase and the Cochrane library databases,  
21 were searched from the inception to 9 April 2020 for observational studies. The  
22 inclusion criteria were as follows: 1) original observational studies (cohort and  
23 case-control studies), 2) evaluating the association between DM and OC risk, 3) the  
24 risk estimates were reported, 4) human population, 5) without language restriction.  
25 The MeSH keywords were as follows: “diabetes mellitus”, “diabetes mellitus, type 1”,  
26 “diabetes mellitus, type 2”, “diabetes, gestational”, “ovarian neoplasms”, “ovarian  
27 cancer”, “cohort studies”, “case-control studies”, etc. A comprehensive search  
28 strategy was provided in the additional file 2. In addition, we searched the potentially  
29 eligible bibliographies of relevant articles for the purpose of completeness. The  
30 exclusion criteria in this meta-analysis were: randomized controlled trial, case reports,  
31 letters, reviews or animals studies. Eligibility assessment was performed by two  
32 authors (WHL and ZL).  
33  
34  
35

36 First, this two authors excluded duplicates via a reference manager. Second, the  
37 two authors read the title and abstract to further screen the eligible studies. Finally, we  
38 included the studies by reviewing the full text. Any disagreements were solved by  
39 means of discussion.  
40  
41  
42  
43

### 44 **Data extraction**

45 Data were extracted by one author (WHL), and then checked by a second  
46 investigator (ZL). The main extracted information are described in Table 1 and 2. The  
47 association between DM and OC was the primary outcome of interest of our study.  
48  
49

### 50 **Assessment of Study Quality**

51 The Newcastle-Ottawa Scale (NOS) score was employed to evaluate the study  
52 quality of observational studies (cohort and case-control studies), with a maximum  
53 score of 9, of which 0 to 3, 4 to 6, 7 to 9 score were considered as low, fair, and high  
54 quality, respectively.<sup>34</sup>  
55  
56  
57

### 58 **Assessment of risk of bias**

59 All selected literatures were subjected to a sensitivity analysis to explore the  
60

1  
2  
3 robustness of the pooled effects.<sup>35</sup>  
4  
5

### 6 **Statistical analysis**

7 The effect estimates of original studies were 5 measures of association, including  
8 relative risk (RR), standardized incidence ratio (SIR), incidence rate ratio (IRR),  
9 hazard ratio (HR) and odds ratio (OR). Given that the frequency of OC is relatively  
10 low, the latter four measures were considered to yield approximately equal estimates  
11 to that of the RR. Therefore, we reported all pooled results as RR with 95%  
12 confidence interval (CI).<sup>36</sup>  
13  
14

15 The statistical heterogeneity was measured by  $\chi^2$  (threshold  $p=0.10$ ) and  
16 quantified by the  $I^2$  statistic. The publication bias was also appraised using the funnel  
17 plot, Begg's and Egger's Test. We prefer to choose the random-effects model to  
18 analyze all data due to the conservativeness of the analyze results.<sup>37</sup>The statistical  
19 analysis were performed with the Stata 12.0 software (StataCorp, College Station, TX,  
20 USA). All statistical analyses were two-sided with an  $\alpha$  level of 0.05.  
21  
22

23 Prespecified subgroup analyses were carried out to identify the sources of  
24 heterogeneity between studies in accordance with the study design (case-control vs.  
25 cohort studies), DM types (type 1 DM vs. type 2 DM vs. GDM), duration of  
26 follow-up (<10 year vs.  $\geq 10$  year), level of adjustment (unadjusted vs. adjusted and  
27 BMI-adjusted vs. BMI-unadjusted), study quality (NOS  $\geq 7$  vs. <7 points) and  
28 geographic areas (North America vs. Europe vs. Asian vs. Oceania). Subsequently, a  
29 cumulative meta-analysis for the association between DM and the risk of OC was  
30 performed to detect the accumulated effects of DM on OC risk based on the  
31 publication year.  
32  
33  
34  
35

## 36 **Results**

### 37 **Search results and study characteristics**

38 The details on the study-selection procedure are shown in Figure 1. As of 9 April  
39 2020, our search strategy initially identified 543 records and 36 citations met criteria  
40 for final inclusion after screening. These 36 publications published between 1985 and  
41 2020, which included 9 case-control and 27 cohort studies, were eligible for final  
42 analysis, with 14,496 incident cases of OC in this meta-analysis.  
43  
44

45 Among these included studies, 6 studies evaluated the relation between type 1  
46 DM and risk of OC, 28 studies investigated the relationship between type 2 DM and  
47 OC risk, and the remaining 4 studies assessed this association between GDM and OC  
48 risk as well. With regard to geographic location, 1 studies originated from Oceania, 1  
49 in Europe and Oceania, 6 in North America, 14 in Europe, and 14 studies from Asia.  
50 The follow-up period of cohort studies varied, ranging from 3.5 years to 18.0 years.  
51 Studies were heterogeneous regarding age, ranging from 12.3 to 89 years. The  
52 case-control studies comprised 3946 OC cases and 46,471 controls.  
53  
54

55 The main characteristics of included studies are given in Table 1 and Table 2.  
56  
57  
58  
59  
60

**Table 1** Baseline characteristics of the cohort studies

| Study ID                      | Country or region | Study period | Follow-Up Duration, y | Population | age (years) | No. of Subjects | No. of OC Cases | Population setting | NOS score |
|-------------------------------|-------------------|--------------|-----------------------|------------|-------------|-----------------|-----------------|--------------------|-----------|
| Weiderpass 2002 <sup>38</sup> | Sweden            | 1965–1994    | 5.7                   | Type 2 DM  | 66.4        | 141,627         | 337             | PBR                | 8         |
| Zendehdel 2003 <sup>39</sup>  | Sweden            | 1965–1999    | 15.0                  | Type 1 DM  | 17.3        | 14,323          | 9               | PBR                | 7         |
| Swerdlow 2005 <sup>a 40</sup> | UK                | 1972–2003    | 18.0                  | Type 1 DM  | <30         | 11,047          | 16              | PBR                | 7         |
| Swerdlow 2005 <sup>b 40</sup> | UK                | 1972–2003    | 18.0                  | Type 2 DM  | 30–49       | 2122            | 6               | PBR                | 7         |
| Inoue 2006 <sup>41</sup>      | Japan             | 1990–2003    | 10.7                  | Type 2 DM  | 51.8        | 51,223          | 74              | PBR                | 8         |
| Khan 2006 <sup>42</sup>       | Japan             | 1988–1997    | 7.6                   | Type 2 DM  | 40–79       | 33503           | 29              | PBR and HBR        | 7         |
| Hemminki 2010 <sup>43</sup>   | Sweden            | 1964–2007    | 15.0                  | Type 2 DM  | 39–75       | 24,827          | 192             | PBR and HBR        | 7         |
| Chodick 2010 <sup>44</sup>    | Israel            | 2000–2008    | 8.0                   | Type 2 DM  | 62          | 47,682          | 88              | PBR                | 7         |
| Shu 2010 <sup>45</sup>        | Sweden            | 1964–2006    | 17.0                  | Type 1 DM  | 12.3        | 11,290          | 9               | PBR and HBR        | 8         |
| Wotton 2011 <sup>a 46</sup>   | Southern England  | 1963–1998    | ...                   | Type 2 DM  | >30         | 132271          | 37              | PBR and HBR        | 7         |
| Wotton 2011 <sup>b 46</sup>   | southern England  | 1999–2008    | ...                   | Type 2 DM  | >30         | 90427           | 8               | PBR and HBR        | 7         |
| Johnson 2011 <sup>47</sup>    | Canada            | 1994–2006    | 4.4                   | Type 2 DM  | 60.7        | 169,012         | 295             | PBR                | 7         |
| Lambe 2011 <sup>48</sup>      | Sweden            | 1985–1996    | 11.7                  | Type 2 DM  | 46.6        | 230,737         | 536             | PBR                | 8         |
| Gapstur 2012 <sup>31</sup>    | USA               | 1992–2007    | ...                   | Type 2 DM  | 62.28       | 63,440          | 524             | PBR                | 7         |
| Lo 2013 <sup>49</sup>         | Taiwan            | 1996–2009    | 3.5                   | Type 2 DM  | 60.45       | 912,447         | 948             | PBR                | 7         |
| Chen 2014 <sup>30</sup>       | Taiwan            | 2000–2008    | >9.0                  | Type 2 DM  | 61.09       | 638,618         | 935             | PBR                | 9         |
| Hsu 2015 <sup>50</sup>        | Taiwan            | 2000–2008    | 6.2                   | Type 1 DM  | 49.2        | 7752            | 7               | PBR                | 7         |
| Harding 2015 <sup>25</sup>    | Australia         | 1997–2008    | 12.0                  | Type 1 DM  | 27.4        | 38,644          | 38              | PBR                | 7         |
| Harding 2015 <sup>25</sup>    | Australia         | 1997–2008    | 5.8                   | Type 2 DM  | 60.4        | 408426          | 792             | PBR                | 7         |

|                                            |                 |           |      |           |       |           |       |      |   |
|--------------------------------------------|-----------------|-----------|------|-----------|-------|-----------|-------|------|---|
| Dankner 2016 <sup>24</sup>                 | Israel          | 2002-2012 | 11.0 | Type 2 DM | 46.63 | 1,152,122 | 1,495 | PBR  | 8 |
| Carstensen 2016 <sup>21</sup>              | Multi-countries | 1972-2014 | ...  | Type 1 DM | <40   | ...       | 252   | PBR  | 7 |
| Fuchs 2017 <sup>23</sup>                   | Israel          | 1988-2013 | 12.0 | GDM       | 28.45 | 104,715   | 56    | PB   | 7 |
| Ballotari 2017 <sup>26</sup>               | Italy           | 2010-2013 | 4.0  | Type 2 DM | 47    | 195,930   | 160   | PBR  | 6 |
| Han 2018 <sup>28</sup>                     | Korean          | 2002-2015 | 10.0 | GDM       | 27.33 | 102,900   | 1,148 | PB   | 8 |
| He 2018 <sup>29</sup>                      | China           | 2003-2014 | ...  | Type 2 DM | 63.7  | 14,193    | 24    | PB   | 7 |
| Bao 2018 <sup>51</sup>                     | Swedish         | 1998-2014 | ...  | Type 2 DM | 62.57 | 25,154    | 57    | Twin | 6 |
| Saarela 2019 <sup>52</sup>                 | Finland         | 1988-2014 | 10.5 | Type 2 DM | ...   | 223,602   | 977   | PBR  | 6 |
| Linkeviciute-Ulinskiene 2019 <sup>15</sup> | Lithuania       | 2000-2012 | 6.8  | Type 2 DM | 64.0  | 78,823    | 249   | PBR  | 7 |
| Peng 2019 <sup>53</sup>                    | Taiwan          | 2000-2013 | 6.8  | GDM       | 28.97 | 990,572   | 1196  | PB   | 7 |
| Pace 2020 <sup>54</sup>                    | Canada          | 1990-2007 | 13.1 | GDM       | ...   | 68,588    | 56    | PB   | 7 |

T1DM type 1 diabetes mellitus, T2DM type 2 DM, GDM gestational DM, HB hospital-based, HB hospital-based registry, PBR population-based registry. PB population-based

1  
2  
3  
4  
5  
6  
7  
8  
9  
10  
11  
12  
13  
14  
15  
16  
17  
18  
19  
20  
21  
22  
23  
24  
25  
26  
27  
28  
29  
30  
31  
32  
33  
34  
35  
36  
37  
38  
39  
40  
41  
42  
43  
44  
45  
46

**Table 2** Baseline characteristics of the case-control studies

| <b>Study ID</b>              | <b>Country or region</b> | <b>Study period</b> | <b>Population</b> | <b>age (years)</b> | <b>No. Cases/ Controls</b> | <b>Population setting</b> | <b>NOS score</b> |
|------------------------------|--------------------------|---------------------|-------------------|--------------------|----------------------------|---------------------------|------------------|
| O'Mara 1985 <sup>55</sup>    | USA                      | 1957-1965           | Type 2 DM         | 30-89              | 328/2,342                  | HB                        | 5                |
| Adler 1996 <sup>56</sup>     | USA                      | 1975-1987           | Type 2 DM         | 51.98              | 595/1,587                  | PBR                       | 5                |
| Parazzini 1997 <sup>57</sup> | Italy                    | 1983-1991           | Type 2 DM         | 52.52              | 971/2,758                  | HB                        | 5                |
| Mori 1998 <sup>58</sup>      | Japan                    | 1994-1996           | Type 2 DM         | 54.24              | 89/323                     | PB                        | 7                |
| Kuriki 2007 <sup>59</sup>    | Japan                    | 1988-2000           | Type 2 DM         | 57.57              | 218/33,569                 | PBR and HBR               | 6                |
| Reis 2010 <sup>27</sup>      | Turkey                   | 2002-2003           | Type 2 DM         | 51.0               | 217/1,050                  | HB                        | 6                |
| Attner 2012 <sup>60</sup>    | Sweden                   | 1998-2007           | Type 2 DM         | ...                | 289/2,207                  | PBR                       | 7                |
| Bosetti 2012 <sup>61</sup>   | Italy                    | 1991-2009           | Type 2 DM         | 56.70              | 1,031/2,411                | HB                        | 5                |
| Ruiz 2016 <sup>62</sup>      | USA                      | 2003-2008           | Type 2 DM         | 57.5               | 208/224                    | HB                        | 5                |

T1DM type 1 diabetes mellitus, T2DM type 2 DM, GDM gestational DM, HB hospital-based, HB hospital-based registry, PBR population-based registry. PB population-based

### Assessment of Study Quality

The NOS quality stars ranged between 5 and 9, and the average score was 6.3 for case-control and 7.19 for cohort studies (Additional file 3). Two (22.22%) case-control and twenty-four (88.89%) cohort studies were regarded as high-quality (NOS  $\geq$  7 points).

The sensitivity analysis suggested no single study had significant influence on the summarized RR, which revealed the stability of pooled estimate (Additional file 4). No obvious evidence of publication bias was detected by inspection of the funnel plot and statistical tests (Begg test,  $P=0.246$ ; Egger test,  $P=0.132$ ; Additional file 4).

### Synthesis of primary outcome

All 36 studies reported the association between DM and OC risk, and the combined RR was 1.20 (95% CI = 1.10 to 1.31), with substantial statistical heterogeneity among these studies ( $X^2=152.43$ ,  $P=0.000$ ;  $I^2=75.1\%$ ; Figure 2).

### The results of subgroup analysis

When stratified by study design subtypes, a statistically significant effect of DM on OC risk was observed in cohort studies (RR, 1.22; 95% CI = 1.11 to 1.33), however, the case-control studies found no relationship between DM and the incidence of OC in spite of a positive trend (RR, 1.08; 95% CI = 0.77 to 1.53). In the analysis stratified according to DM types, a positive significant association was noted in both type 1 DM (RR, 1.44; 95% CI = 1.06 to 1.95) and type 2 DM group (RR, 1.17; 95% CI = 1.06 to 1.30), but not in GDM group (RR, 1.14; 95% CI = 0.90 to 1.43).

A subgroup analysis was conducted considering the level of adjustment, the summary RR in adjusted studies (RR, 1.23; 95% CI = 1.10 to 1.37) was more marked than in unadjusted studies (RR, 1.13; 95% CI = 0.98 to 1.31). Both BMI-adjusted (RR, 1.37; 95% CI = 1.16 to 1.62) and BMI-unadjusted (RR, 1.12; 95% CI = 1.03 to 1.22) analyses were associated with an augmented risk of OC. In further analysis by the length of follow-up, women who experienced a long period of follow-up i.e.  $\geq$  10 years (RR, 1.33; 95% CI = 1.09 to 1.63) were more likely to have a higher risk of OC than those who had less than 10 years (RR, 1.14; 95% CI = 1.01 to 1.29).

Subgroup analysis by continent, DM was significantly positively correlated with increased the OC risk among studies conducted in Asia (RR, 1.43; 95% CI = 1.20 to 1.71) and Oceania (RR, 1.24; 95% CI = 1.16 to 1.32) except for Europe (RR, 1.15; 95% CI = 0.99 to 1.35) and North America (RR, 0.94; 95% CI = 0.73 to 1.21) studies. The RR was 1.24 (95% CI = 1.12 to 1.36) for high study quality studies with significant difference and 1.07 (95% CI = 0.85 to 1.35) for non-high study quality studies without statistical significance (Additional file 4).

The results of subgroup analyses are shown in Table 3.

### Table 3 Summary risk estimates of the



### subgroup analysis results of DM and OC risk

| Subgroup            | Studies, n | RR (95% CI)      | $I^2$ (%) | $P$   |
|---------------------|------------|------------------|-----------|-------|
| Total               | 36         | 1.20 (1.10,1.31) | 75.1      | 0.000 |
| Study design        |            |                  |           |       |
| Case-control        | 9          | 1.08 (0.77,1.53) | 71.1      | 0.001 |
| Cohort              | 27         | 1.22 (1.11,1.33) | 76.7      | 0.000 |
| DM types            |            |                  |           |       |
| type 1 DM           | 6          | 1.44 (1.06,1.95) | 67.2      | 0.009 |
| type 2 DM           | 28         | 1.17 (1.06,1.30) | 78.5      | 0.000 |
| GDM                 | 4          | 1.14 (0.90,1.43) | 31.5      | 0.224 |
| Geographic location |            |                  |           |       |
| North America       | 6          | 0.94 (0.73,1.21) | 53.9      | 0.054 |
| Europe              | 14         | 1.15 (0.99,1.35) | 81.3      | 0.000 |
| Asian               | 14         | 1.43 (1.20,1.71) | 69.5      | 0.000 |
| Oceania             | 1          | 1.24 (1.16,1.32) | 0.00      | 0.486 |
| Follow-up           |            |                  |           |       |
| <10 year            | 11         | 1.14 (1.01,1.29) | 77.0      | 0.000 |
| $\geq 10$ year      | 12         | 1.33 (1.09,1.63) | 84.8      | 0.000 |
| Level of adjustment |            |                  |           |       |
| No                  | 8          | 1.13(0.98,1.31)  | 85.0      | 0.000 |
| Yes                 | 28         | 1.23 (1.10,1.37) | 63.9      | 0.000 |
| BMI                 |            |                  |           |       |
| Yes                 | 13         | 1.37 (1.16,1.62) | 53.5      | 0.011 |
| No                  | 23         | 1.12 (1.03,1.22) | 69.9      | 0.000 |
| Study quality       |            |                  |           |       |
| NOS <7              | 10         | 1.07 (0.85,1.35) | 66.7      | 0.001 |
| NOS $\geq 7$        | 26         | 1.24 (1.12,1.36) | 74.2      | 0.000 |

RR relative risk, CI confidence interval, NOS Newcastle–Ottawa Quality Assessment Scale, BMI body mass index, P for heterogeneity within each subgroup.

### Cumulative meta-analysis

Although there is no association between DM and the risk of OC before Shu 2010<sup>45</sup> (cumulative RR, 1.32; 95% CI= 1.00 to 1.74), subsequent studies after this study show a consistently positive association (cumulative RR, 1.32; 95% CI = 1.01 to 1.71; Figure 3).

### DISCUSSION

Our systematic review and meta-analysis of 27 cohort and 9 case-control studies evaluated the association between DM and the incidence of OC and suggested that women with DM had a 20% elevated risk of OC, as compared to those without history of DM. Similar positive finding was observed when we analyzed by cohort studies, however, no meaningful difference was noted when pooled by the case-control studies.

1  
2  
3 Since the inherent nature of recall and select bias in case-control study, certain biases  
4 might lead to inaccurate reporting of causal relationship.<sup>63</sup>  
5

6 A subgroup meta-analysis based on DM types indicated that the risk of OC in  
7 type 1 DM group (44%) is higher than in type 2 DM group (17%), while no  
8 significant association is found in GDM group. That may explain the excess risk in  
9 type 1 DM populations that, persons with type 1 DM usually require exogenous  
10 insulin treatment for the purpose of regulating blood glucose level,<sup>64</sup> and those who  
11 treated with insulin appear to be at higher risk to develop cancer.<sup>65</sup> On the other hand,  
12 due to the limited numbers of eligible studies and sample sizes, the result obtained  
13 from GDM group should be interpreted with caution. In addition, owing to an  
14 increase risk of cancer with age, the length of follow-up for GDM patients might be  
15 too short to detect cancers in young women.<sup>66</sup>  
16  
17  
18

19 The positive link was even more prominent arresting in studies that adjusted for  
20 covariates (ie, age, obesity, hypertension, reproductive history, smoking or alcohol,  
21 etc.) than these for unadjusted covariates analysis. Similarly, compared to subjects  
22 without BMI-adjusted, the significant relationship between DM and OC also still  
23 existed and became stronger in BMI-adjustment studies. These two suggested DM is a  
24 potential independent risk factor for the development of OC.  
25  
26

27 In keeping with finding, women with DM had a less risk of OC during the early  
28 follow-up period (<10 years) than during the late follow-up duration ( $\geq 10$  years).  
29 Owing that OC occurs mostly in middle and elderly women, therefore, women who  
30 enjoyed a long-term follow up are more susceptible to OC compared to those who had  
31 a short follow-up period.<sup>26</sup> Subgroup analysis on geographic areas, the Asian and  
32 Oceania studies yielded similar positive results as the aforementioned analyses apart  
33 from Europe and North America studies, which is consistent with a previous  
34 meta-analysis described by Zhang.<sup>67</sup> Geographic variation in the incidence of OC in  
35 women worldwide might explain such heterogeneity. The significant association was  
36 consistent in high study studies (NOS  $\geq 7$  points) except for non-high quality studies  
37 (NOS <7 points).  
38  
39  
40

41 To our knowledge, only three previous meta-analyses were published in this field.  
42 In 2013, Lee et al.<sup>68</sup> performed a first meta-analysis with 7 case-control and 11 cohort  
43 studies and supported that DM patients have a 17% increased risk of OC, compared  
44 with non-DM patients. A subsequent meta-analysis carried out by Wang et al. in 2017  
45 with 14 cohort studies exposed that DM is associated with a 19% raised risk of OC,<sup>69</sup>  
46 which was further confirmed by a meta-analysis with 15 cohort studies (32%) later  
47 the same year.<sup>67</sup> Our results, in accordance with these relevant studies, suggested that  
48 DM is correlated with a 20% increased risk of OC, and a significant positive  
49 association between them was observed in cohort studies (22%) but not in  
50 case-control studies (8%). Furthermore, the result of cumulative meta-analysis  
51 showed that it is not until in Shu 2010<sup>45</sup> that aforementioned positive result first  
52 appeared and the association tended to be stable thereafter.  
53  
54  
55  
56

57 The underlying carcinogenesis effect of DM to ovary was not completely  
58 uncovered at present, but several plausible mechanisms have been postulated to  
59 explain the links between them. Previous studies have shown that the neoplastic  
60

1  
2  
3 process has been considered to be influenced by DM through these mechanisms, mainly  
4 including hyperglycemia, hyperinsulinemia and chronic inflammation.<sup>70 71</sup> Because of  
5 a prolonged exposure to inflammation and hyperglycemic condition, the re-iterant  
6 lesion and repair cycles which is associated with incessant ovulation process could be  
7 slow down, thus, resulting in an underlying risk of OC.<sup>72</sup> Studies have shown that the  
8 hyperglycemic state of patients with DM produces many of inflammatory cytokines,  
9 such as tumor necrosis factor- $\alpha$ , interleukin-1 $\beta$  and IL-6, thereby facilitating a  
10 tumor-favorable microenvironment and potentially causing immune hyperactivation  
11 and tumor cells growth.<sup>73 74</sup> Moreover, previous research confirmed that higher  
12 concentration of glucose is associated with an elevated expression level of vascular  
13 endothelial growth factor, and the latter has been known as a potent proangiogenic  
14 factor,<sup>75</sup> indicating a tumor-promotion effect of DM. Biologically, an excess of insulin,  
15 as a growth factor, may stimulate the growth of tumor, whether for endogenous or  
16 exogenous.<sup>76</sup> Besides, several oral anti-hyperglycemic therapies (sulfonylureas) have  
17 been shown to increase risk of cancer development.<sup>77</sup> However, metformin, as a  
18 insulin sensitizer, may reduce this risk via mediated by stimulation of AMP-activated  
19 protein kinase and inhibition of gluconeogenesis in the liver.<sup>78</sup>

20  
21  
22  
23  
24  
25  
26  
27  
28  
29  
30  
31  
32  
33  
34  
35  
36  
37  
38  
39  
40  
41  
42  
43  
44  
45  
46  
47  
48  
49  
50  
51  
52  
53  
54  
55  
56  
57  
58  
59  
60  
Various strengths of our meta-analysis should be mentioned. First, this update  
study included a comprehensive search strategy, a great number of participants, a  
detailed subgroup, and sensitivity analysis, which provided a more reliable estimate of  
the association between DM and OC risk. Second, we investigated the link between  
type 1 DM, type 2 DM or GDM and the risk of OC, respectively, which might be  
more generalizable than the previous three meta-analyses. Third, most of included  
observational studies has controlled at least one potential confounder, such as age,  
BMI, obesity, drinking and smoking habits, as well as regular physical exercise, etc.  
suggesting the reliability of the outcomes. Finally, in a cumulative meta-analysis by  
publication date, the 95% CIs became progressively narrower as the number of  
sample size increases, indicating increased the estimation accuracy of risk estimates.

However, the present study has several limitations. First, the aggregated data of  
our study were originated from observational studies, thus, the causality between DM  
and the prevalence of OC remains speculative. Second, the heterogeneity among the  
individual studies was substantial, so does in subgroup analysis. Finally, although the  
majority of eligible studies adjusted for many potential confounders, we could not  
determine the influence of other various factors such as different treatment modalities  
(eg. sulfonylureas, insulin sensitizing agents and insulin) of DM, oral contraceptive  
use, hormone replacement therapy, etc. Therefore, further trials are warranted to  
clarify the association.

## CONCLUSIONS

Accumulated evidence from cohort and case-control studies suggested that  
women with history of DM have a higher risk of OC than those who without, despite  
significant heterogeneity among individual studies. However, further high-quality  
studies with prospective design that are adequately controlled for potential  
confounding factors should be conducted to identify our results.

**Acknowledgements** The authors would like to thank all the anonymous reviewers for their valuable comments and suggestions on improving quality of this study.

**Contributors** HXH, WHL and ZL conceived the study idea and designed the study. WHL and ZL collected literatures, reviewed the articles, collected the data and performed all data analyses. W-HL, ZL, HXH, XB and CM were responsible for drafting of the manuscript. All the authors approved the final version of this manuscript.

**Funding** This research received no specific grant from any funding agency.

**Competing interests** The authors declare that they have no competing interests.

**Patient consent for publication** Not required.

**Provenance and peer review** Not commissioned; externally peer reviewed.

**Ethical Approval** Not applicable.

**Data availability statement** All data are fully available without restriction.

## ORCID

Hai-Li Wang: <https://orcid.org/0000-0002-0310-8143>;

Lei Zhong: <https://orcid.org/0000-0002-0208-1823>;

Xiao-hong Huang: <https://orcid.org/0000-0003-4737-7780>.

## REFERENCES

1. Padilla-Martinez F, Collin F, Kwasniewski M, et al. Systematic Review of Polygenic Risk Scores for Type 1 and Type 2 Diabetes. *International journal of molecular sciences* 2020;**21**(5).
2. Committee of the Japan Diabetes Society on the Diagnostic Criteria of Diabetes M, Seino Y, Nanjo K, et al. Report of the committee on the classification and diagnostic criteria of diabetes mellitus. *Journal of diabetes investigation* 2010;**1**(5):212-28.
3. International Diabetes Federation. IDF Diabetes Atlas. 9th ed. Brussels, Belgium: International Diabetes Federation. Secondary International Diabetes Federation. IDF Diabetes Atlas. 9th ed. Brussels, Belgium: International Diabetes Federation 2019 [https://diabetesatlas.org/upload/resources/material/20200302\\_133351\\_IDFATLAS9e-final-web.pdf](https://diabetesatlas.org/upload/resources/material/20200302_133351_IDFATLAS9e-final-web.pdf). Accessed April 18, 2020.
4. Mulyani WRW, Sanjiwani MID, Sandra, et al. Chaperone-Based Therapeutic Target Innovation: Heat Shock Protein 70 (HSP70) for Type 2 Diabetes Mellitus. *Diabetes, metabolic syndrome and obesity : targets and therapy* 2020;**13**:559-68.

- 1
  - 2
  - 3
  - 4
  - 5
  - 6
  - 7
  - 8
  - 9
  - 10
  - 11
  - 12
  - 13
  - 14
  - 15
  - 16
  - 17
  - 18
  - 19
  - 20
  - 21
  - 22
  - 23
  - 24
  - 25
  - 26
  - 27
  - 28
  - 29
  - 30
  - 31
  - 32
  - 33
  - 34
  - 35
  - 36
  - 37
  - 38
  - 39
  - 40
  - 41
  - 42
  - 43
  - 44
  - 45
  - 46
  - 47
  - 48
  - 49
  - 50
  - 51
  - 52
  - 53
  - 54
  - 55
  - 56
  - 57
  - 58
  - 59
  - 60
5. Rachdaoui N. Insulin: The Friend and the Foe in the Development of Type 2 Diabetes Mellitus. *International journal of molecular sciences* 2020;**21**(5).
6. Nimmagadda S, Penet MF. Ovarian Cancer Targeted Theranostics. *Frontiers in oncology* 2019;**9**:1537.
7. Bergsten TM, Burdette JE, Dean M. Fallopian tube initiation of high grade serous ovarian cancer and ovarian metastasis: Mechanisms and therapeutic implications. *Cancer letters* 2020;**476**:152-60.
8. Global Cancer Observatory. Secondary Global Cancer Observatory Accessed April 18, 2020 2020. [http://gco.iarc.fr/tomorrow/graphic-isotype?type=0&type\\_sex=0&mode=population&sex=2&populations=900&cancers=25&age\\_group=value&apc\\_male=0&apc\\_female=0&print=0](http://gco.iarc.fr/tomorrow/graphic-isotype?type=0&type_sex=0&mode=population&sex=2&populations=900&cancers=25&age_group=value&apc_male=0&apc_female=0&print=0). Accessed April 18, 2020.
9. Arend R, Martinez A, Szul T, et al. Biomarkers in ovarian cancer: To be or not to be. *Cancer* 2019;**125 Suppl 24**:4563-72.
10. Loret N, Denys H, Tummers P, et al. The Role of Epithelial-to-Mesenchymal Plasticity in Ovarian Cancer Progression and Therapy Resistance. *Cancers* 2019;**11**(6).
11. Ferlay J, Soerjomataram I, Dikshit R, et al. Cancer incidence and mortality worldwide: sources, methods and major patterns in GLOBOCAN 2012. *Int J Cancer* 2015;**136**(5):E359-86.
12. Bacalbasa N, Balescu I, Vilcu M, et al. The Risk of Para-Aortic Lymph Node Metastases in Apparent Early Stage Ovarian Cancer. *Medicina (Kaunas)* 2020;**56**(3).
13. Mallen AR, Townsend MK, Tworoger SS. Risk Factors for Ovarian Carcinoma. *Hematology/oncology clinics of North America* 2018;**32**(6):891-902.
14. Stewart C, Ralyea C, Lockwood S. Ovarian Cancer: An Integrated Review. *Semin Oncol Nurs* 2019;**35**(2):151-56.
15. Linkeviciute-Ulinskiene D, Patasius A, Zabuliene L, et al. Increased Risk of Site-Specific Cancer in People with Type 2 Diabetes: A National Cohort Study. *International journal of environmental research and public health* 2019;**17**(1).
16. Wideroff L, Gridley G, Mellemkjaer L, et al. Cancer incidence in a population-based cohort of patients hospitalized with diabetes mellitus in Denmark. *Journal of the National Cancer Institute* 1997;**89**(18):1360-5.
17. Oberaigner W, Ebenbichler C, Oberaigner K, et al. Increased cancer incidence risk in type 2 diabetes mellitus: results from a cohort study in Tyrol/Austria. *BMC public health* 2014;**14**:1058.
18. Wang Y, Wang B, Yan S, et al. Type 2 diabetes and gender differences in liver cancer by considering different confounding factors: a meta-analysis of cohort studies. *Annals of epidemiology* 2016;**26**(11):764-72.
19. Song S, Wang B, Zhang X, et al. Long-Term Diabetes Mellitus Is Associated with an Increased Risk of Pancreatic Cancer: A Meta-Analysis. *PLoS One* 2015;**10**(7):e0134321.
20. Liao C, Zhang D, Mungo C, et al. Is diabetes mellitus associated with increased incidence and disease-specific mortality in endometrial cancer? A systematic review and meta-analysis of cohort studies. *Gynecol Oncol* 2014;**135**(1):163-71.
21. Carstensen B, Read SH, Friis S, et al. Cancer incidence in persons with type 1 diabetes: a five-country study of 9,000 cancers in type 1 diabetic individuals. *Diabetologia* 2016;**59**(5):980-8.
22. Hasan S, Shaw SM, Gelling LH, et al. Exercise modes and their association with hypoglycemia

- 1  
2  
3 episodes in adults with type 1 diabetes mellitus: a systematic review. *BMJ open diabetes*  
4 *research & care* 2018;**6**(1):e000578.
- 5  
6 23. Fuchs O, Sheiner E, Meirovitz M, et al. The association between a history of gestational diabetes  
7 mellitus and future risk for female malignancies. *Archives of gynecology and obstetrics*  
8 2017;**295**(3):731-36.
- 9  
10 24. Dankner R, Boffetta P, Balicer RD, et al. Time-Dependent Risk of Cancer After a Diabetes Diagnosis  
11 in a Cohort of 2.3 Million Adults. *American journal of epidemiology* 2016;**183**(12):1098-106.
- 12  
13 25. Harding JL, Shaw JE, Peeters A, et al. Cancer risk among people with type 1 and type 2 diabetes:  
14 disentangling true associations, detection bias, and reverse causation. *Diabetes care*  
15 2015;**38**(2):264-70.
- 16  
17 26. Ballotari P, Vicentini M, Manicardi V, et al. Diabetes and risk of cancer incidence: results from a  
18 population-based cohort study in northern Italy. *BMC cancer* 2017;**17**(1):703.
- 19  
20 27. Reis N, Kizilkaya Beji N. Risk factors for ovarian cancer: Results from a hospital-based case-control  
21 study. *Turkiye Klinikleri Journal of Medical Sciences* 2010;**30**(1):79-87.
- 22  
23 28. Han KT, Cho GJ, Kim EH. Evaluation of the Association between Gestational Diabetes Mellitus at  
24 First Pregnancy and Cancer within 10 Years Postpartum Using National Health Insurance Data  
25 in South Korea. *Int J Environ Res Public Health* 2018;**15**(12).
- 26  
27 29. He X, Shi L, Wu J. Retrospective database analysis of cancer risk in patients with type 2 diabetes  
28 mellitus in China. *Curr Med Res Opin* 2018;**34**(6):1089-98.
- 29  
30 30. Chen HF, Chang YH, Ko MC, et al. A large scale population-based cohort study on the risk of  
31 ovarian neoplasm in patients with type 2 diabetes mellitus. *Gynecologic oncology*  
32 2014;**134**(3):576-80.
- 33  
34 31. Gapstur SM, Patel AV, Diver WR, et al. Type II diabetes mellitus and the incidence of epithelial  
35 ovarian cancer in the cancer prevention study-II nutrition cohort. *Cancer Epidemiol*  
36 *Biomarkers Prev* 2012;**21**(11):2000-5.
- 37  
38 32. Stroup DF, Berlin JA, Morton SC, et al. Meta-analysis of observational studies in epidemiology: a  
39 proposal for reporting. Meta-analysis Of Observational Studies in Epidemiology (MOOSE)  
40 group. *Jama* 2000;**283**(15):2008-12.
- 41  
42 33. Moher D, Liberati A, Tetzlaff J, et al. Preferred reporting items for systematic reviews and  
43 meta-analyses: the PRISMA statement. *Bmj* 2009;**339**:b2535.
- 44  
45 34. Stang A. Critical evaluation of the Newcastle-Ottawa scale for the assessment of the quality of  
46 nonrandomized studies in meta-analyses. *European journal of epidemiology*  
47 2010;**25**(9):603-5.
- 48  
49 35. Higgins JPT, Green S, Cochrane Collaboration. *Cochrane handbook for systematic reviews of*  
50 *interventions*. Chichester, England ; Hoboken, NJ: Wiley-Blackwell, 2008.
- 51  
52 36. Siristatidis C, Sergantani TN, Kanavidis P, et al. Controlled ovarian hyperstimulation for IVF:  
53 impact on ovarian, endometrial and cervical cancer--a systematic review and meta-analysis.  
54 *Human reproduction update* 2013;**19**(2):105-23.
- 55  
56 37. Borenstein M, Hedges LV, Higgins JP, et al. A basic introduction to fixed-effect and random-effects  
57 models for meta-analysis. *Res Synth Methods* 2010;**1**(2):97-111.
- 58  
59 38. Weiderpass E, Ye W, Vainio H, et al. Diabetes mellitus and ovarian cancer (Sweden). *Cancer causes*  
60 *& control : CCC* 2002;**13**(8):759-64.
39. Zendejdel K, Nyren O, Ostenson CG, et al. Cancer incidence in patients with type 1 diabetes  
mellitus: a population-based cohort study in Sweden. *Journal of the National Cancer Institute*

- 2003;**95**(23):1797-800.
40. Swerdlow AJ, Laing SP, Qiao Z, et al. Cancer incidence and mortality in patients with insulin-treated diabetes: a UK cohort study. *Br J Cancer* 2005;**92**(11):2070-5.
41. Inoue M, Iwasaki M, Otani T, et al. Diabetes mellitus and the risk of cancer: results from a large-scale population-based cohort study in Japan. *Arch Intern Med* 2006;**166**(17):1871-7.
42. Khan M, Mori M, Fujino Y, et al. Site-specific cancer risk due to diabetes mellitus history: evidence from the Japan Collaborative Cohort (JACC) Study. *Asian Pac J Cancer Prev* 2006;**7**(2):253-9.
43. Hemminki K, Li X, Sundquist J, et al. Risk of cancer following hospitalization for type 2 diabetes. *Oncologist* 2010;**15**(6):548-55.
44. Chodick G, Heymann AD, Rosenmann L, et al. Diabetes and risk of incident cancer: a large population-based cohort study in Israel. *Cancer causes & control : CCC* 2010;**21**(6):879-87.
45. Shu X, Ji J, Li X, et al. Cancer risk among patients hospitalized for Type 1 diabetes mellitus: a population-based cohort study in Sweden. *Diabetic medicine : a journal of the British Diabetic Association* 2010;**27**(7):791-7.
46. Wotton CJ, Yeates DG, Goldacre MJ. Cancer in patients admitted to hospital with diabetes mellitus aged 30 years and over: record linkage studies. *Diabetologia* 2011;**54**(3):527-34.
47. Johnson JA, Bowker SL, Richardson K, et al. Time-varying incidence of cancer after the onset of type 2 diabetes: evidence of potential detection bias. *Diabetologia* 2011;**54**(9):2263-71.
48. Lambe M, Wigertz A, Garmo H, et al. Impaired glucose metabolism and diabetes and the risk of breast, endometrial, and ovarian cancer. *Cancer causes & control : CCC* 2011;**22**(8):1163-71.
49. Lo SF, Chang SN, Muo CH, et al. Modest increase in risk of specific types of cancer types in type 2 diabetes mellitus patients. *Int J Cancer* 2013;**132**(1):182-8.
50. Hsu PC, Lin WH, Kuo TH, et al. A Population-Based Cohort Study of All-Cause and Site-Specific Cancer Incidence Among Patients With Type 1 Diabetes Mellitus in Taiwan. *Journal of epidemiology* 2015;**25**(9):567-73.
51. Bao C, Pedersen NL, Yang R, et al. Diabetes in midlife and risk of cancer in late life: A nationwide Swedish twin study. *Int J Cancer* 2018;**143**(4):793-800.
52. Saarela K, Tuomilehto J, Sund R, et al. Cancer incidence among Finnish people with type 2 diabetes during 1989-2014. *European journal of epidemiology* 2019;**34**(3):259-65.
53. Peng YS, Lin JR, Cheng BH, et al. Incidence and relative risk for developing cancers in women with gestational diabetes mellitus: a nationwide cohort study in Taiwan. *BMJ Open* 2019;**9**(2):e024583.
54. Pace R, Rahme E, Dasgupta K. Gestational diabetes mellitus and risk of incident primary cancer: A population-based retrospective cohort study. *Journal of diabetes* 2020;**12**(1):87-90.
55. O'Mara BA, Byers T, Schoenfeld E. Diabetes mellitus and cancer risk: a multisite case-control study. *Journal of chronic diseases* 1985;**38**(5):435-41.
56. Adler AI, Weiss NS, Kamb ML, et al. Is diabetes mellitus a risk factor for ovarian cancer? A case-control study in Utah and Washington (United States). *Cancer causes & control : CCC* 1996;**7**(4):475-8.
57. Parazzini F, Moroni S, La Vecchia C, et al. Ovarian cancer risk and history of selected medical conditions linked with female hormones. *Eur J Cancer* 1997;**33**(10):1634-7.
58. Mori M, Nishida T, Sugiyama T, et al. Anthropometric and other risk factors for ovarian cancer in a case-control study. *Jpn J Cancer Res* 1998;**89**(3):246-53.
59. Kuriki K, Hirose K, Tajima K. Diabetes and cancer risk for all and specific sites among Japanese men

- 1  
2  
3 and women. *European journal of cancer prevention : the official journal of the European*  
4 *Cancer Prevention Organisation (ECP)* 2007;**16**(1):83-9.
- 5  
6 60. Attner B, Landin-Olsson M, Lithman T, et al. Cancer among patients with diabetes, obesity and  
7 abnormal blood lipids: a population-based register study in Sweden. *Cancer causes & control :*  
8 *CCC* 2012;**23**(5):769-77.
- 9  
10 61. Bosetti C, Rosato V, Polesel J, et al. Diabetes mellitus and cancer risk in a network of case-control  
11 studies. *Nutrition and cancer* 2012;**64**(5):643-51.
- 12  
13 62. Ruiz MP, Morales-Ramirez PB, Dziadek OL, et al. Epithelial ovarian cancer and type of peritoneal  
14 insult: a case-control study. *European journal of obstetrics, gynecology, and reproductive*  
15 *biology* 2016;**205**:170-3.
- 16  
17 63. Setia MS. Methodology Series Module 2: Case-control Studies. *Indian J Dermatol*  
18 2016;**61**(2):146-51.
- 19  
20 64. Smith U, Gale EA. Does diabetes therapy influence the risk of cancer? *Diabetologia*  
21 2009;**52**(9):1699-708.
- 22  
23 65. Carstensen B, Witte DR, Friis S. Cancer occurrence in Danish diabetic patients: duration and insulin  
24 effects. *Diabetologia* 2012;**55**(4):948-58.
- 25  
26 66. Wang Y, Yan P, Fu T, et al. The association between gestational diabetes mellitus and cancer in  
27 women: A systematic review and meta-analysis of observational studies. *Diabetes &*  
28 *metabolism* 2020.
- 29  
30 67. Zhang D, Li N, Xi Y, et al. Diabetes mellitus and risk of ovarian cancer. A systematic review and  
31 meta-analysis of 15 cohort studies. *Diabetes research and clinical practice* 2017;**130**:43-52.
- 32  
33 68. Lee JY, Jeon I, Kim JW, et al. Diabetes mellitus and ovarian cancer risk: a systematic review and  
34 meta-analysis of observational studies. *International journal of gynecological cancer : official*  
35 *journal of the International Gynecological Cancer Society* 2013;**23**(3):402-12.
- 36  
37 69. Wang L, Wang L, Zhang J, et al. Association between diabetes mellitus and subsequent ovarian  
38 cancer in women: A systematic review and meta-analysis of cohort studies. *Medicine*  
39 2017;**96**(16):e6396.
- 40  
41 70. Kellenberger LD, Bruin JE, Greenaway J, et al. The role of dysregulated glucose metabolism in  
42 epithelial ovarian cancer. *J Oncol* 2010;**2010**:514310.
- 43  
44 71. Weinert LS. International Association of Diabetes and Pregnancy Study Groups recommendations  
45 on the diagnosis and classification of hyperglycemia in pregnancy: comment to the  
46 International Association of Diabetes and Pregnancy Study Groups Consensus Panel.  
47 *Diabetes care* 2010;**33**(7):e97; author reply e98.
- 48  
49 72. Piek JM, Kenemans P, Verheijen RH. Intraperitoneal serous adenocarcinoma: a critical appraisal of  
50 three hypotheses on its cause. *Am J Obstet Gynecol* 2004;**191**(3):718-32.
- 51  
52 73. Gupta S, Gambhir JK, Kalra O, et al. Association of biomarkers of inflammation and oxidative stress  
53 with the risk of chronic kidney disease in Type 2 diabetes mellitus in North Indian population.  
54 *Journal of diabetes and its complications* 2013;**27**(6):548-52.
- 55  
56 74. Chang SC, Yang WV. Hyperglycemia, tumorigenesis, and chronic inflammation. *Critical reviews in*  
57 *oncology/hematology* 2016;**108**:146-53.
- 58  
59 75. Giannarelli R, Aragona M, Coppelli A, et al. Reducing insulin resistance with metformin: the  
60 evidence today. *Diabetes Metab* 2003;**29**(4 Pt 2):6S28-35.
76. Suh S, Kim KW. Diabetes and Cancer: Cancer Should Be Screened in Routine Diabetes Assessment.  
*Diabetes & metabolism journal* 2019;**43**(6):733-43.



- 1  
2  
3 77. Hussain S, Chowdhury TA. The Impact of Comorbidities on the Pharmacological Management of  
4 Type 2 Diabetes Mellitus. *Drugs* 2019;**79**(3):231-42.  
5  
6 78. Faramarzi L, Dadashpour M, Sadeghzadeh H, et al. Enhanced anti-proliferative and pro-apoptotic  
7 effects of metformin encapsulated PLGA-PEG nanoparticles on SKOV3 human ovarian  
8 carcinoma cells. *Artificial cells, nanomedicine, and biotechnology* 2019;**47**(1):737-46.  
9

10  
11 Figure 1 Article screening flow diagram.

12 Figure 2 Meta-analysis of the association between DM and the risk of OC. DM  
13 diabetes mellitus, OC ovarian cancer.  
14

15  
16 Figure 3 Cumulative meta-analysis of the association between DM and risk of OC.  
17 DM diabetes mellitus, OC ovarian cancer.  
18

19  
20 Additional file 1 The PRISMA checklist and MOOSE checklist.  
21

22  
23 Additional file 2 The search strategy and search results.  
24

25  
26 Additional file 3 Quality assessment of included studies based on the  
27 Newcastle-Ottawa Scale score.  
28

29  
30 Additional file 4 Sensitivity analysis and assessment of reporting biases & Forest  
31 plots for the subgroup analyses of DM and subsequent risk of OC. DM diabetes  
32 mellitus, OC ovarian cancer.  
33  
34  
35  
36  
37  
38  
39  
40  
41  
42  
43  
44  
45  
46  
47  
48  
49  
50  
51  
52  
53  
54  
55  
56  
57  
58  
59  
60

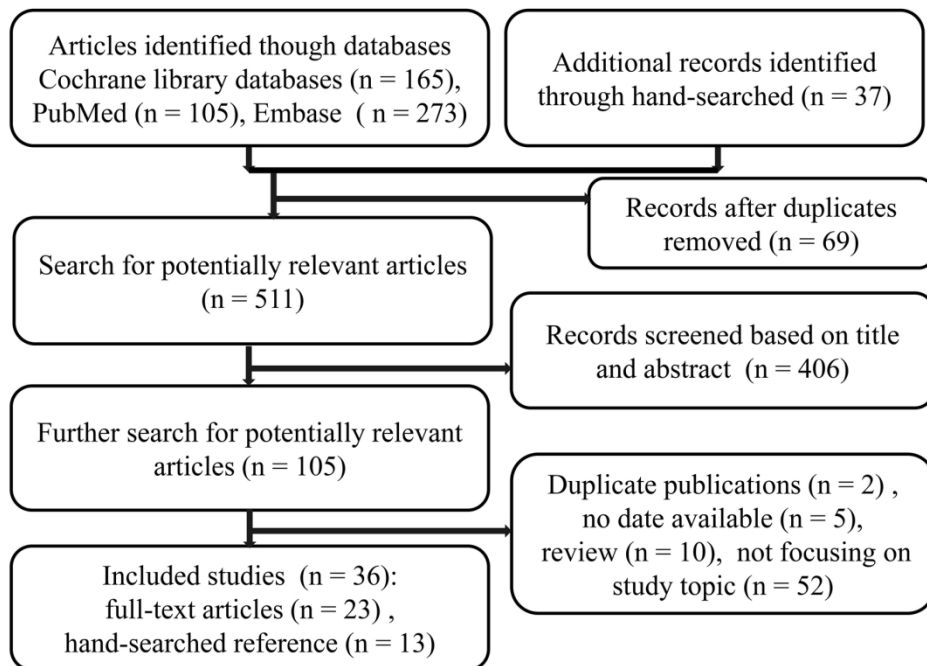

709 KB

80x56mm (600 x 600 DPI)

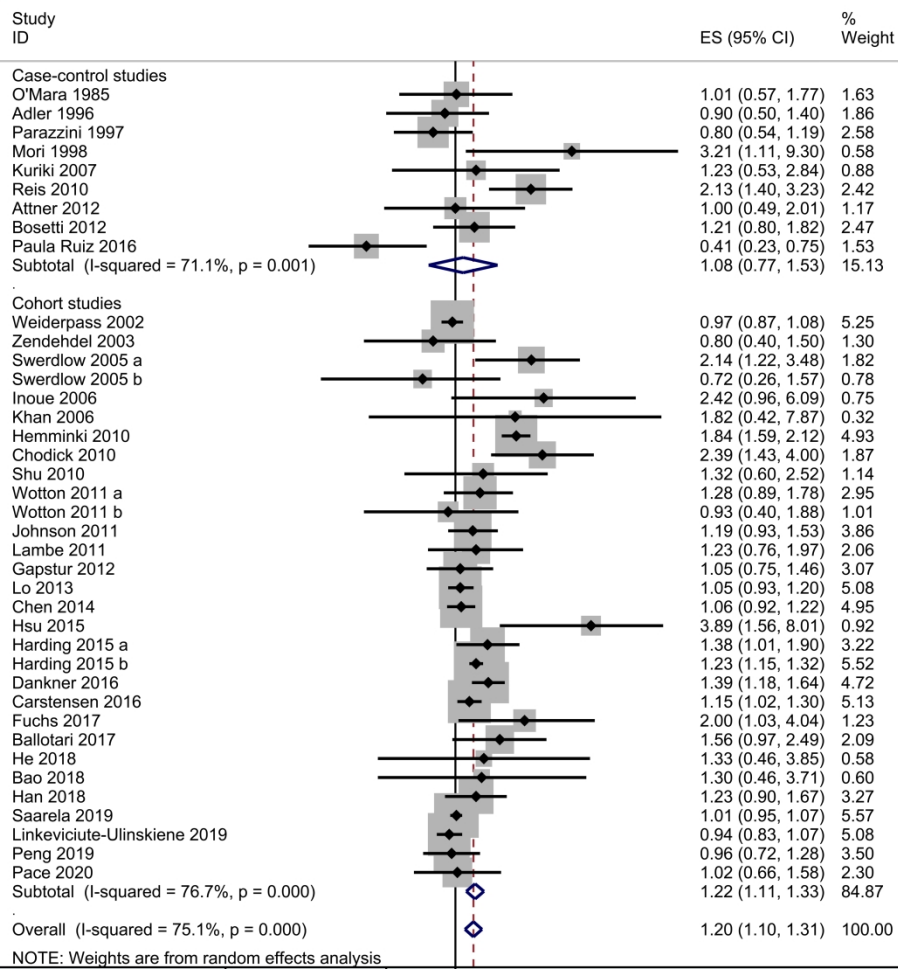

1  
2  
3  
4  
5  
6  
7  
8  
9  
10  
11  
12  
13  
14  
15  
16  
17  
18  
19  
20  
21  
22  
23  
24  
25  
26  
27  
28  
29  
30  
31  
32  
33  
34  
35  
36  
37  
38  
39  
40  
41  
42  
43  
44  
45  
46  
47  
48  
49  
50  
51  
52  
53  
54  
55  
56  
57  
58  
59  
60



### The Meta-analysis of Observational Studies in Epidemiology (MOOSE) protocol checklist

| Criteria                                                                        | Brief description of how the criteria were handled in the meta-analysis                                                                                                                        |
|---------------------------------------------------------------------------------|------------------------------------------------------------------------------------------------------------------------------------------------------------------------------------------------|
| <b>Reporting of background should include</b>                                   |                                                                                                                                                                                                |
| √ Problem definition                                                            | A history of diabetes mellitus (DM) has been linked to increased risk of ovarian cancer (OC), but the results have not been consistent. The aim of this study was to clarify this association. |
| √ Hypothesis statement                                                          | DM increases the risk of OC.                                                                                                                                                                   |
| √ Description of study outcomes                                                 | OC                                                                                                                                                                                             |
| √ Type of exposure or intervention used                                         | DM                                                                                                                                                                                             |
| √ Type of study designs used                                                    | Observational studies: cohort and case-control studies.                                                                                                                                        |
| √ Study population                                                              | No restriction.                                                                                                                                                                                |
| <b>Reporting of search strategy should include</b>                              |                                                                                                                                                                                                |
| √ Qualifications of searchers                                                   | ZL (first author) and WHL have published a meta-analysis in Critical care in 2017 (with experience of literature search).                                                                      |
| √ Search strategy, including time period included in the synthesis and keywords | PubMed from 1965 –April 2020<br>EMBASE from 1974 –April 2020<br>Cochrane library databases 1974 –April 2020<br>See additional file 2 the search strategy and search results.                   |
| √ Databases and registries searched                                             | PubMed, Embase and the Cochrane library databases                                                                                                                                              |
| √ Search software used, name and version, including special features            | No search software is being used.<br>The process of retrieving citations and eliminating the duplications was used by EndNote software.                                                        |
| √ Use of hand searching                                                         | The potentially eligible bibliographies of relevant articles were manually examined to identify any additional publications relevant to our study.                                             |
| √ List of citations located and those excluded, including justifications        | The literature search process is given in flow diagram.                                                                                                                                        |
| √ Method of addressing articles published in languages other than English       | Through a translation app or consult professionals.                                                                                                                                            |
| √ Method of handling abstracts and unpublished studies                          | Not applicable                                                                                                                                                                                 |
| √ Description of any contact with authors                                       | Not applicable                                                                                                                                                                                 |

|                                               |                                                                                                                                            |                                                                                                                                                                                                                                                   |
|-----------------------------------------------|--------------------------------------------------------------------------------------------------------------------------------------------|---------------------------------------------------------------------------------------------------------------------------------------------------------------------------------------------------------------------------------------------------|
| <b>Reporting of methods should include</b>    |                                                                                                                                            |                                                                                                                                                                                                                                                   |
| √                                             | Description of relevance or appropriateness of studies assembled for assessing the hypothesis to be tested                                 | Detailed inclusion and exclusion criteria were also given in our study.                                                                                                                                                                           |
| √                                             | Rationale for the selection and coding of data                                                                                             | The PICO framework                                                                                                                                                                                                                                |
| √                                             | Assessment of confounding                                                                                                                  | Sensitivity analyses                                                                                                                                                                                                                              |
| √                                             | Assessment of study quality, including blinding of quality assessors; stratification or regression on possible predictors of study results | The Newcastle-Ottawa Scale (NOS) score                                                                                                                                                                                                            |
| √                                             | Assessment of heterogeneity                                                                                                                | The statistical heterogeneity was measured by $\chi^2$ (threshold $p=0.10$ ) and quantified by the $I^2$ statistic.                                                                                                                               |
| √                                             | Description of statistical methods in sufficient detail to be replicated                                                                   | The details refer to the “Statistical analysis” in our study.                                                                                                                                                                                     |
| √                                             | Provision of appropriate tables and graphics                                                                                               | We included 1 box detailing the terms used for database search, 1 flow chart, 1 summary table, 1 forest plot of all studies, 1 forest plot to examine effect modification by age, 1 table of sensitivity analyses.                                |
| <b>Reporting of results should include</b>    |                                                                                                                                            |                                                                                                                                                                                                                                                   |
| √                                             | Graph summarizing individual study estimates and overall estimate                                                                          | Figure 2                                                                                                                                                                                                                                          |
| √                                             | Table giving descriptive information for each study included                                                                               | Table 1                                                                                                                                                                                                                                           |
| √                                             | Results of sensitivity testing                                                                                                             | Additional file 4                                                                                                                                                                                                                                 |
| √                                             | Indication of statistical uncertainty of findings                                                                                          | For more details refer to the<br><br>The pooled effects were analyzed by relative risk (RR) with 95% confidence interval, and the statistical heterogeneity was measured by $\chi^2$ (threshold $p=0.10$ ) and quantified by the $I^2$ statistic. |
| <b>Reporting of discussion should include</b> |                                                                                                                                            |                                                                                                                                                                                                                                                   |
| √                                             | Quantitative assessment of bias                                                                                                            | The cumulative meta-analysis and sensitivity analysis showed pooled effect was stable and reliable.                                                                                                                                               |
| √                                             | Justification for exclusion                                                                                                                | The exclusion criteria in this meta-analysis were: randomized controlled trial, case reports, letters, reviews or animals studies.                                                                                                                |
| √                                             | Assessment of quality of                                                                                                                   | No apparent publication bias was identified in this                                                                                                                                                                                               |

|   |                                                                |                                                                                                                                                                                                                     |
|---|----------------------------------------------------------------|---------------------------------------------------------------------------------------------------------------------------------------------------------------------------------------------------------------------|
|   | included studies                                               | meta-analysis.                                                                                                                                                                                                      |
|   | <b>Reporting of conclusions should include</b>                 |                                                                                                                                                                                                                     |
| √ | Consideration of alternative explanations for observed results | Significant heterogeneity between these studies was observed.                                                                                                                                                       |
| √ | Generalization of the conclusions                              | Women with history of DM have a higher risk of OC than those who without.                                                                                                                                           |
| √ | Guidelines for future research                                 | Further high-quality studies with prospective design that are adequately controlled for potential confounding factors and verified the association with subtypes of OC should be conducted to identify our results. |
| √ | Disclosure of funding source                                   | This research received no specific grant from any funding agency.                                                                                                                                                   |

## Systematic reviews and meta-analyses (PRISMA) guidelines

1  
2  
3  
4  
5  
6  
7  
8  
9  
10  
11  
12  
13  
14  
15  
16  
17  
18  
19  
20  
21  
22  
23  
24  
25  
26  
27  
28  
29  
30  
31  
32  
33  
34  
35  
36  
37  
38  
39  
40  
41  
42  
43  
44  
45  
46  
47

| Section/topic             | #  | Checklist item                                                                                                                                                                                                                                                                                              | Reported on page # |
|---------------------------|----|-------------------------------------------------------------------------------------------------------------------------------------------------------------------------------------------------------------------------------------------------------------------------------------------------------------|--------------------|
| <b>TITLE</b>              |    |                                                                                                                                                                                                                                                                                                             |                    |
| Title                     | 1  | Identify the report as a systematic review, meta-analysis, or both.                                                                                                                                                                                                                                         | Title              |
| <b>ABSTRACT</b>           |    |                                                                                                                                                                                                                                                                                                             |                    |
| Structured summary        | 2  | Provide a structured summary including, as applicable: background; objectives; data sources; study eligibility criteria, participants, and interventions; study appraisal and synthesis methods; results; limitations; conclusions and implications of key findings; systematic review registration number. | Abstract           |
| <b>INTRODUCTION</b>       |    |                                                                                                                                                                                                                                                                                                             |                    |
| Rationale                 | 3  | Describe the rationale for the review in the context of what is already known.                                                                                                                                                                                                                              | Introduction       |
| Objectives                | 4  | Provide an explicit statement of questions being addressed with reference to participants, interventions, comparisons, outcomes, and study design (PICOS).                                                                                                                                                  | Methods            |
| <b>METHODS</b>            |    |                                                                                                                                                                                                                                                                                                             |                    |
| Protocol and registration | 5  | Indicate if a review protocol exists, if and where it can be accessed (e.g., Web address), and, if available, provide registration information including registration number.                                                                                                                               | None               |
| Eligibility criteria      | 6  | Specify study characteristics (e.g., PICOS, length of follow-up) and report characteristics (e.g., years considered, language, publication status) used as criteria for eligibility, giving rationale.                                                                                                      | Methods            |
| Information sources       | 7  | Describe all information sources (e.g., databases with dates of coverage, contact with study authors to identify additional studies) in the search and date last searched.                                                                                                                                  | Methods            |
| Search                    | 8  | Present full electronic search strategy for at least one database, including any limits used, such that it could be repeated.                                                                                                                                                                               | Methods            |
| Study selection           | 9  | State the process for selecting studies (i.e., screening, eligibility, included in systematic review, and, if applicable, included in the meta-analysis).                                                                                                                                                   | Methods            |
| Data collection process   | 10 | Describe method of data extraction from reports (e.g., piloted forms, independently, in duplicate) and any processes for obtaining and confirming data from investigators.                                                                                                                                  | Methods            |



1  
2  
3  
4

|                                      |    |                                                                                                                                                                                                                        |         |
|--------------------------------------|----|------------------------------------------------------------------------------------------------------------------------------------------------------------------------------------------------------------------------|---------|
| 5 Data items                         | 11 | List and define all variables for which data were sought (e.g., PICOS, funding sources) and any assumptions and simplifications made.                                                                                  | Methods |
| 7 Risk of bias in individual studies | 12 | Describe methods used for assessing risk of bias of individual studies (including specification of whether this was done at the study or outcome level), and how this information is to be used in any data synthesis. | Methods |
| 9 Summary measures                   | 13 | State the principal summary measures (e.g., risk ratio, difference in means).                                                                                                                                          | Methods |
| 11 Synthesis of results              | 14 | Describe the methods of handling data and combining results of studies, if done, including measures of consistency (e.g., $I^2$ ) for each meta-analysis.                                                              | Methods |

14  
15

| 6 Section/topic                  | #  | Checklist item                                                                                                                                                                                           | Reported on page # |
|----------------------------------|----|----------------------------------------------------------------------------------------------------------------------------------------------------------------------------------------------------------|--------------------|
| 7 Risk of bias across studies    | 15 | Specify any assessment of risk of bias that may affect the cumulative evidence (e.g., publication bias, selective reporting within studies).                                                             | Methods            |
| 9 Additional analyses            | 16 | Describe methods of additional analyses (e.g., sensitivity or subgroup analyses, meta-regression), if done, indicating which were pre-specified.                                                         | Methods            |
| 24 <b>RESULTS</b>                |    |                                                                                                                                                                                                          |                    |
| 25 Study selection               | 17 | Give numbers of studies screened, assessed for eligibility, and included in the review, with reasons for exclusions at each stage, ideally with a flow diagram.                                          | Results            |
| 27 Study characteristics         | 18 | For each study, present characteristics for which data were extracted (e.g., study size, PICOS, follow-up period) and provide the citations.                                                             | Results            |
| 29 Risk of bias within studies   | 19 | Present data on risk of bias of each study and, if available, any outcome level assessment (see item 12).                                                                                                | Results            |
| 31 Results of individual studies | 20 | For all outcomes considered (benefits or harms), present, for each study: (a) simple summary data for each intervention group (b) effect estimates and confidence intervals, ideally with a forest plot. | Results            |
| 33 Synthesis of results          | 21 | Present results of each meta-analysis done, including confidence intervals and measures of consistency.                                                                                                  | Results            |
| 35 Risk of bias across studies   | 22 | Present results of any assessment of risk of bias across studies (see Item 15).                                                                                                                          | Results            |
| 37 Additional analysis           | 23 | Give results of additional analyses, if done (e.g., sensitivity or subgroup analyses, meta-regression [see Item 16]).                                                                                    | Results            |

39  
40  
41  
42  
43  
44  
45  
46  
47

1  
2  
3  
4  
5  
6  
7  
8  
9  
10  
11  
12  
13  
14  
15  
16  
17  
18  
19  
20  
21  
22  
23  
24  
25  
26  
27  
28  
29  
30  
31  
32  
33  
34  
35  
36  
37  
38  
39  
40  
41  
42  
43  
44  
45  
46  
47

| <b>DISCUSSION</b>   |    |                                                                                                                                                                                      |             |
|---------------------|----|--------------------------------------------------------------------------------------------------------------------------------------------------------------------------------------|-------------|
| Summary of evidence | 24 | Summarize the main findings including the strength of evidence for each main outcome; consider their relevance to key groups (e.g., healthcare providers, users, and policy makers). | Discussion  |
| Limitations         | 25 | Discuss limitations at study and outcome level (e.g., risk of bias), and at review-level (e.g., incomplete retrieval of identified research, reporting bias).                        | Discussion  |
| Conclusions         | 26 | Provide a general interpretation of the results in the context of other evidence, and implications for future research.                                                              | Conclusions |
| <b>FUNDING</b>      |    |                                                                                                                                                                                      |             |
| Funding             | 27 | Describe sources of funding for the systematic review and other support (e.g., supply of data); role of funders for the systematic review.                                           | None        |

From: Moher D, Liberati A, Tetzlaff J, Altman DG, The PRISMA Group (2009). Preferred Reporting Items for Systematic Reviews and Meta-Analyses: The PRISMA Statement. PLoS Med 6(7): e1000097. doi:10.1371/journal.pmed1000097

For more information, visit: [www.prisma-statement.org](http://www.prisma-statement.org).

### Additional file 2: The search strategy and search results

PubMed (n=105), the Cochrane library databases(n=165) and Embase (n=273)

#### PubMed:

#1 (((((((((((((((("Ovarian Neoplasms"[Mesh]) OR "Ovarian Neoplasms"[Title/Abstract]) OR "Neoplasm, Ovarian"[Title/Abstract]) OR "Ovarian Neoplasm"[Title/Abstract]) OR "Ovary Neoplasms"[Title/Abstract]) OR "Neoplasm, Ovary"[Title/Abstract]) OR "Ovary Neoplasm"[Title/Abstract]) OR "Neoplasms, Ovarian"[Title/Abstract]) OR "Ovary Cancer"[Title/Abstract]) OR "Cancer, Ovary"[Title/Abstract]) OR "Ovary Cancers"[Title/Abstract]) OR "Ovarian Cancer"[Title/Abstract]) OR "Cancer, Ovarian"[Title/Abstract]) OR "Ovarian Cancers"[Title/Abstract]) OR "Cancer of Ovary"[Title/Abstract]) OR "Cancer of the Ovary"[Title/Abstract]) OR (((((((((((((((("Carcinoma, Ovarian Epithelial"[Mesh]) OR "Ovarian Epithelial Carcinomas"[Title/Abstract]) OR "Epithelial Ovarian Cancer"[Title/Abstract]) OR "Ovarian Epithelial Cancers"[Title/Abstract]) OR "Ovarian Epithelial Cancer"[Title/Abstract]) OR "Epithelial Ovarian Cancers"[Title/Abstract]) OR "Ovarian Epithelial Carcinoma"[Title/Abstract]) OR "Epithelial Ovarian Carcinoma"[Title/Abstract]) OR "Epithelial Ovarian Carcinomas"[Title/Abstract]) OR "ovarian carcinoma"[Title/Abstract])) 101778

#2 (((("diabete\*"[Title/Abstract]) OR (((((((((((((((("Diabetes Mellitus, Type 1"[Title/Abstract]) OR "Insulin-Dependent Diabetes Mellitus"[Title/Abstract]) OR "Juvenile-Onset Diabetes Mellitus"[Title/Abstract]) OR "IDDM"[Title/Abstract]) OR "Juvenile-Onset Diabetes"[Title/Abstract]) OR "Juvenile Onset Diabetes"[Title/Abstract]) OR "Sudden-Onset Diabetes Mellitus"[Title/Abstract]) OR "Type 1 Diabetes Mellitus"[Title/Abstract]) OR "Insulin-Dependent Diabetes Mellitus 1"[Title/Abstract]) OR "Insulin Dependent Diabetes Mellitus 1"[Title/Abstract]) OR "Type 1 Diabetes"[Title/Abstract]) OR "Diabetes, Type 1"[Title/Abstract]) OR "Autoimmune Diabetes"[Title/Abstract]) OR "Brittle Diabetes Mellitus"[Title/Abstract]) OR "Ketosis-Prone Diabetes Mellitus"[Title/Abstract]) OR "Diabetes Mellitus, Type 1"[Mesh])) OR (((((((((((((((("Diabetes Mellitus, Type 2"[Title/Abstract]) OR "Ketosis-Resistant Diabetes Mellitus"[Title/Abstract]) OR "Non-Insulin-Dependent Diabetes Mellitus"[Title/Abstract]) OR "Stable Diabetes Mellitus"[Title/Abstract]) OR "NIDDM"[Title/Abstract]) OR "Maturity-Onset Diabetes Mellitus"[Title/Abstract]) OR "Maturity Onset Diabetes Mellitus"[Title/Abstract]) OR "MODY"[Title/Abstract]) OR "Type 2 Diabetes Mellitus"[Title/Abstract]) OR "Noninsulin-Dependent Diabetes Mellitus"[Title/Abstract]) OR "Noninsulin Dependent Diabetes Mellitus"[Title/Abstract]) OR "Maturity-Onset Diabetes"[Title/Abstract]) OR "Maturity Onset Diabetes"[Title/Abstract]) OR "Type 2 Diabetes"[Title/Abstract]) OR "Adult-Onset Diabetes Mellitus"[Title/Abstract]) OR "Diabetes Mellitus, Type 2"[Mesh])) OR ((("Diabetes Mellitus"[Mesh]) OR "Diabetes Mellitus"[Title/Abstract]))) OR (((("Gestational Diabetes Mellitus"[Title/Abstract]) OR "Diabetes Mellitus, Gestational"[Title/Abstract]) OR

"Gestational Diabetes"[Title/Abstract]) OR "Pregnancy-Induced Diabetes"[Title/Abstract]) OR "Diabetes, Gestational"[Mesh])) 523490

#3 (((("Observational Studies as Topic"[Mesh]) OR "Observational Study"[Publication Type]))) OR (((((((((((((((((((("Case-Control Studies"[Mesh]) OR "Case-Control Studies"[Title/Abstract]) OR "Case-Control Study"[Title/Abstract]) OR "Case-Comparison Studies"[Title/Abstract]) OR "Case Comparison Studies"[Title/Abstract]) OR "Case-Comparison Study"[Title/Abstract]) OR "Case-Compeer Studies"[Title/Abstract]) OR "Case-Referent Studies"[Title/Abstract]) OR "Case Referent Studies"[Title/Abstract]) OR "Case-Referent Study"[Title/Abstract]) OR "Case-Base Studies"[Title/Abstract]) OR "Case Base Studies"[Title/Abstract]) OR "Case Control Studies"[Title/Abstract]) OR "Case Control Study"[Title/Abstract]) OR "Nested Case-Control Studies"[Title/Abstract]) OR "Case-Control Studies, Nested"[Title/Abstract]) OR "Nested Case Control Studies"[Title/Abstract]) OR "Nested Case-Control Study"[Title/Abstract]) OR "Matched Case-Control Studies"[Title/Abstract]) OR "Matched Case Control Studies"[Title/Abstract]) OR "Matched Case-Control Study"[Title/Abstract]))) OR (((((((((((((((("Cohort Studies"[Mesh]) OR "Cohort Studies"[Title/Abstract]) OR "Cohort Study"[Title/Abstract]) OR "Concurrent Studies"[Title/Abstract]) OR "Concurrent Study"[Title/Abstract]) OR "Closed Cohort Studies"[Title/Abstract]) OR "Closed Cohort Study"[Title/Abstract]) OR "Cohort Analysis"[Title/Abstract]) OR "Cohort Analyses"[Title/Abstract]) OR "Historical Cohort Studies"[Title/Abstract]) OR "Historical Cohort Study"[Title/Abstract]) OR "Incidence Studies"[Title/Abstract]) OR "Incidence Study"[Title/Abstract]) OR "Cohort\*"[Title/Abstract]))) 2451208

#4 #1 and #2 and #3 **105** (search results)

**Cochrane library:**

## ID Search

#1 (Ovarian Neoplasms):ti,ab,kw OR (Neoplasm, Ovarian):ti,ab,kw OR (Ovarian Neoplasm):ti,ab,kw OR (Ovary Neoplasms):ti,ab,kw OR (Neoplasm, Ovary):ti,ab,kw (Word variations have been searched)

#2 (Neoplasms, Ovary):ti,ab,kw OR (Ovary Neoplasm):ti,ab,kw OR (Neoplasms, Ovarian):ti,ab,kw OR (Ovary Cancer):ti,ab,kw OR (Cancer, Ovary):ti,ab,kw (Word variations have been searched)

#3 (Cancers, Ovary):ti,ab,kw OR (Ovary Cancers):ti,ab,kw OR (Ovarian Cancer):ti,ab,kw OR (Cancer, Ovarian):ti,ab,kw OR (Cancers, Ovarian):ti,ab,kw (Word variations have been searched)

#4 (Ovarian Cancers):ti,ab,kw OR (Cancer of Ovary):ti,ab,kw OR (Cancer of the Ovary):ti,ab,kw OR (Carcinoma, Ovarian Epithelial):ti,ab,kw OR (Carcinomas, Ovarian Epithelial):ti,ab,kw (Word variations have been searched)

#5 (Epithelial Carcinoma, Ovarian):ti,ab,kw OR (Epithelial Carcinomas, Ovarian):ti,ab,kw OR (Ovarian Epithelial Carcinomas):ti,ab,kw OR (Epithelial Ovarian Cancer):ti,ab,kw OR (Ovarian Epithelial Cancer):ti,ab,kw (Word variations have been searched)

#6 (Cancer, Ovarian Epithelial):ti,ab,kw OR (Cancers, Ovarian Epithelial):ti,ab,kw OR (Epithelial Cancer, Ovarian):ti,ab,kw OR (Epithelial Cancers, Ovarian):ti,ab,kw OR (Ovarian Epithelial Cancers):ti,ab,kw (Word variations have been searched)

#7 (Ovarian Cancer, Epithelial):ti,ab,kw OR (Cancer, Epithelial Ovarian):ti,ab,kw OR (Cancers, Epithelial Ovarian):ti,ab,kw OR (Epithelial Ovarian Cancers):ti,ab,kw OR (Ovarian Cancers, Epithelial):ti,ab,kw (Word variations have been searched)

#8 (Ovarian Epithelial Carcinoma):ti,ab,kw OR (Epithelial Ovarian Carcinoma):ti,ab,kw OR (Carcinoma, Epithelial Ovarian):ti,ab,kw OR (Carcinomas, Epithelial Ovarian):ti,ab,kw OR (Epithelial Ovarian Carcinomas):ti,ab,kw (Word variations have been searched)

#9 (Ovarian Carcinoma, Epithelial):ti,ab,kw OR (Ovarian Carcinomas, Epithelial):ti,ab,kw OR (ovarian carcinoma):ti,ab,kw OR (Ovar\*):ti,ab,kw (Word variations have been searched)

#10 MeSH descriptor: [Ovarian Neoplasms] explode all trees

#11 MeSH descriptor: [Carcinoma, Ovarian Epithelial] explode all trees

#12 #1 or #2 or #3 or #4 or #5 or #6 or #7 or #8 or #9 or #10 or #11 17934

#13 (Diabetes mellitus):ti,ab,kw OR (Diabetes Mellitus, Type 2):ti,ab,kw OR (Diabetes Mellitus, Noninsulin-Dependent):ti,ab,kw OR (Diabetes Mellitus, Ketosis-Resistant):ti,ab,kw OR (Diabetes Mellitus, Ketosis Resistant):ti,ab,kw (Word variations have been searched)

#14 (Ketosis-Resistant Diabetes Mellitus):ti,ab,kw OR (Diabetes Mellitus, Non Insulin Dependent):ti,ab,kw OR (Diabetes Mellitus, Non-Insulin-Dependent):ti,ab,kw OR (Non-Insulin-Dependent Diabetes Mellitus):ti,ab,kw OR (Diabetes Mellitus, Stable):ti,ab,kw (Word variations have been searched)

#15 (Stable Diabetes Mellitus):ti,ab,kw OR (Diabetes Mellitus, Type II):ti,ab,kw OR

1  
2  
3 (NIDDM):ti,ab,kw OR (Diabetes Mellitus, Noninsulin Dependent):ti,ab,kw OR  
4 (Diabetes Mellitus, Maturity-Onset):ti,ab,kw (Word variations have been searched)  
5 #16 (Diabetes Mellitus, Maturity Onset):ti,ab,kw OR (Maturity-Onset Diabetes  
6 Mellitus):ti,ab,kw OR (Maturity Onset Diabetes Mellitus):ti,ab,kw OR  
7 (MODY):ti,ab,kw OR (Diabetes Mellitus, Slow-Onset):ti,ab,kw (Word variations  
8 have been searched)  
9 #17 (Diabetes Mellitus, Slow Onset):ti,ab,kw OR (Slow-Onset Diabetes  
10 Mellitus):ti,ab,kw OR (Type 2 Diabetes Mellitus):ti,ab,kw OR  
11 (Noninsulin-Dependent Diabetes Mellitus):ti,ab,kw OR (Noninsulin Dependent  
12 Diabetes Mellitus):ti,ab,kw (Word variations have been searched)  
13 #18 (Maturity-Onset Diabetes):ti,ab,kw OR (Diabetes, Maturity-Onset):ti,ab,kw OR  
14 (Maturity Onset Diabetes):ti,ab,kw OR (Type 2 Diabetes):ti,ab,kw OR (Diabetes,  
15 Type 2):ti,ab,kw (Word variations have been searched)  
16 #19 (Diabetes Mellitus, Adult-Onset):ti,ab,kw OR (Adult-Onset Diabetes  
17 Mellitus):ti,ab,kw OR (Diabetes Mellitus, Adult Onset):ti,ab,kw OR (Diabetes  
18 Mellitus, Type 1):ti,ab,kw OR (Diabetes Mellitus, Insulin-Dependent):ti,ab,kw (Word  
19 variations have been searched)  
20 #20 (Diabetes Mellitus, Insulin Dependent):ti,ab,kw OR (Insulin-Dependent Diabetes  
21 Mellitus):ti,ab,kw OR (Diabetes Mellitus, Juvenile-Onset):ti,ab,kw OR (Diabetes  
22 Mellitus, Juvenile Onset):ti,ab,kw OR (Juvenile-Onset Diabetes Mellitus):ti,ab,kw  
23 (Word variations have been searched)  
24 #21 (IDDM):ti,ab,kw OR (Juvenile-Onset Diabetes):ti,ab,kw OR (Diabetes,  
25 Juvenile-Onset):ti,ab,kw OR (Juvenile Onset Diabetes):ti,ab,kw OR (Diabetes  
26 Mellitus, Sudden-Onset):ti,ab,kw (Word variations have been searched)  
27 #22 (Diabetes Mellitus, Sudden Onset):ti,ab,kw OR (Sudden-Onset Diabetes  
28 Mellitus):ti,ab,kw OR (Type 1 Diabetes Mellitus):ti,ab,kw OR (Diabetes Mellitus,  
29 Insulin-Dependent, 1):ti,ab,kw OR (Insulin-Dependent Diabetes Mellitus 1):ti,ab,kw  
30 (Word variations have been searched)  
31 #23 (Insulin Dependent Diabetes Mellitus 1):ti,ab,kw OR (Type 1 Diabetes):ti,ab,kw  
32 OR (Diabetes, Type 1):ti,ab,kw OR (Diabetes Mellitus, Type I):ti,ab,kw OR (Diabetes,  
33 Autoimmune):ti,ab,kw (Word variations have been searched)  
34 #24 (Autoimmune Diabetes):ti,ab,kw OR (Diabetes Mellitus, Brittle):ti,ab,kw OR  
35 (Brittle Diabetes Mellitus):ti,ab,kw OR (Diabetes Mellitus, Ketosis-Prone):ti,ab,kw  
36 OR (Diabetes Mellitus, Ketosis Prone):ti,ab,kw (Word variations have been searched)  
37 #25 (Ketosis-Prone Diabetes Mellitus):ti,ab,kw OR (Diabetes, Gestational):ti,ab,kw  
38 OR (Diabetes, Pregnancy-Induced):ti,ab,kw OR (Diabetes, Pregnancy  
39 Induced):ti,ab,kw OR (Pregnancy-Induced Diabetes):ti,ab,kw (Word variations have  
40 been searched)  
41 #26 (Gestational Diabetes):ti,ab,kw OR (Diabetes Mellitus, Gestational):ti,ab,kw OR  
42 (Gestational Diabetes Mellitus):ti,ab,kw OR (diabete):ti,ab,kw OR (diabet\*):ti,ab,kw  
43 (Word variations have been searched)  
44 #27 MeSH descriptor: [Diabetes Mellitus] explode all trees  
45 #28 MeSH descriptor: [Diabetes Mellitus, Type 2] explode all trees  
46 #29 MeSH descriptor: [Diabetes Mellitus, Type 1] explode all trees  
47  
48  
49  
50  
51  
52  
53  
54  
55  
56  
57  
58  
59  
60

1  
2  
3 #30 MeSH descriptor: [Diabetes, Gestational] explode all trees

4 #31 #13 or #14 or #15 or #16 or #17 or #18 or #19 or #20 or #21 or #22 or #23 or #24  
5 or #25 or #26 or #27 or #28 or #29 or #30 **89079**

6  
7  
8 #32 (Cohort Studies):ti,ab,kw OR (Cohort Study):ti,ab,kw OR (Studies,  
9 Cohort):ti,ab,kw OR (Study, Cohort):ti,ab,kw OR (Concurrent Studies):ti,ab,kw  
10 (Word variations have been searched)

11 #33 (Studies, Concurrent):ti,ab,kw OR (Concurrent Study):ti,ab,kw OR (Study,  
12 Concurrent):ti,ab,kw OR (Closed Cohort Studies):ti,ab,kw OR (Cohort Studies,  
13 Closed):ti,ab,kw (Word variations have been searched)

14 #34 (Closed Cohort Study):ti,ab,kw OR (Cohort Study, Closed):ti,ab,kw OR (Study,  
15 Closed Cohort):ti,ab,kw OR (Studies, Closed Cohort):ti,ab,kw OR (Analysis,  
16 Cohort):ti,ab,kw (Word variations have been searched)

17 #35 (Cohort Analysis):ti,ab,kw OR (Analyses, Cohort):ti,ab,kw OR (Cohort  
18 Analyses):ti,ab,kw OR (Historical Cohort Studies):ti,ab,kw OR (Cohort Study,  
19 Historical):ti,ab,kw (Word variations have been searched)

20 #36 (Historical Cohort Study):ti,ab,kw OR (Study, Historical Cohort):ti,ab,kw OR  
21 (Cohort Studies, Historical):ti,ab,kw OR (Studies, Historical Cohort):ti,ab,kw OR  
22 (Incidence Studies):ti,ab,kw (Word variations have been searched)

23 #37 (Incidence Study):ti,ab,kw OR (Studies, Incidence):ti,ab,kw OR (Study,  
24 Incidence):ti,ab,kw AND (Cohort\*):ti,ab,kw (Word variations have been searched)

25 #38 MeSH descriptor: [Cohort Studies] explode all trees

26 #39 #32 or #33 or #34 or #35 or #36 or #37 or #38

27 #40 (Case-Control Studies):ti,ab,kw OR (Case-Control Study):ti,ab,kw OR (Studies,  
28 Case-Control):ti,ab,kw OR (Study, Case-Control):ti,ab,kw OR (Case-Comparison  
29 Studies):ti,ab,kw (Word variations have been searched)

30 #41 (Case Comparison Studies):ti,ab,kw OR (Case-Comparison Study):ti,ab,kw OR  
31 (Studies, Case-Comparison):ti,ab,kw OR (Study, Case-Comparison):ti,ab,kw OR  
32 (Case-Compeer Studies):ti,ab,kw (Word variations have been searched)

33 #42 (Studies, Case-Compeer):ti,ab,kw OR (Case-Referent Studies):ti,ab,kw OR  
34 (Case Referrent Studies):ti,ab,kw OR (Case-Referrent Study):ti,ab,kw OR (Studies,  
35 Case-Referrent):ti,ab,kw (Word variations have been searched)

36 #43 (Study, Case-Referrent):ti,ab,kw OR (Case-Referent Studies):ti,ab,kw OR (Case  
37 Referent Studies):ti,ab,kw OR (Case-Referent Study):ti,ab,kw OR (Studies,  
38 Case-Referent):ti,ab,kw (Word variations have been searched)

39 #44 (Study, Case-Referent):ti,ab,kw OR (Case-Base Studies):ti,ab,kw OR (Case Base  
40 Studies):ti,ab,kw OR (Studies, Case-Base):ti,ab,kw OR (Case Control  
41 Studies):ti,ab,kw (Word variations have been searched)

42 #45 (Case Control Study):ti,ab,kw OR (Studies, Case Control):ti,ab,kw OR (Study,  
43 Case Control):ti,ab,kw OR (Nested Case-Control Studies):ti,ab,kw OR (Case-Control  
44 Studies, Nested):ti,ab,kw (Word variations have been searched)

45 #46 (Case-Control Study, Nested):ti,ab,kw OR (Nested Case Control Studies):ti,ab,kw  
46 OR (Nested Case-Control Study):ti,ab,kw OR (Studies, Nested Case-Control):ti,ab,kw  
47 OR (Study, Nested Case-Control):ti,ab,kw (Word variations have been searched)

1  
2  
3 #47 (Matched Case-Control Studies):ti,ab,kw OR (Case-Control Studies,  
4 Matched):ti,ab,kw OR (Case-Control Study, Matched):ti,ab,kw OR (Matched Case  
5 Control Studies):ti,ab,kw OR (Matched Case-Control Study):ti,ab,kw (Word  
6 variations have been searched)  
7

8 #48 (Study, Matched Case-Control):ti,ab,kw OR (Studies, Matched  
9 Case-Control):ti,ab,kw OR (Case-Control):ti,ab,kw OR (Case Control):ti,ab,kw  
10 (Word variations have been searched)  
11

12 #49 MeSH descriptor: [Case-Control Studies] explode all trees  
13

14 #50 #40 or #41 or #42 or #43 or #44 or #45 or #46 or #47 or #48 or #49 104520  
15

16 #51 MeSH descriptor: [Observational Study] explode all trees  
17

18 #52 (Observational Study):ti,ab,kw OR (observation\*):ti,ab,kw (Word variations have  
19 been searched)  
20

21 #53 #51 or #52 224361  
22

23 #54 #39 or #50 or #53 487408  
24

25 #55 #12 and #31 and #54 **165** (search results)  
26  
27  
28  
29  
30  
31  
32  
33  
34  
35  
36  
37  
38  
39  
40  
41  
42  
43  
44  
45  
46  
47  
48  
49  
50  
51  
52  
53  
54  
55  
56  
57  
58  
59  
60



1  
2  
3  
4  
5  
6  
7  
8  
9  
10  
11  
12  
13  
14  
15  
16  
17  
18  
19  
20  
21  
22  
23  
24  
25  
26  
27  
28  
29  
30  
31  
32  
33  
34  
35  
36  
37  
38  
39  
40  
41  
42  
43  
44  
45  
46  
47  
48  
49  
50  
51  
52  
53  
54  
55  
56  
57  
58  
59  
60

**Embase Session Results (9 Apr 2020) (search results: 273)**

| No.   | Query Results                                                                                                                                                                                                                                                                                                                                                                                                                                                                                                                                                                                                | Results   | Date       |
|-------|--------------------------------------------------------------------------------------------------------------------------------------------------------------------------------------------------------------------------------------------------------------------------------------------------------------------------------------------------------------------------------------------------------------------------------------------------------------------------------------------------------------------------------------------------------------------------------------------------------------|-----------|------------|
| #196. | #48 AND #120 AND #195                                                                                                                                                                                                                                                                                                                                                                                                                                                                                                                                                                                        | 273       | 9 Apr 2020 |
| #195. | #121 OR #122 OR #123 OR #124 OR #125 OR #126 OR #127 OR #128 OR #129 OR #130 OR #131 OR #132 OR #133 OR #134 OR #135 OR #136 OR #137 OR #138 OR #139 OR #140 OR #141 OR #142 OR #143 OR #144 OR #145 OR #146 OR #147 OR #148 OR #149 OR #150 OR #151 OR #152 OR #153 OR #154 OR #155 OR #156 OR #157 OR #158 OR #159 OR #160 OR #161 OR #162 OR #163 OR #164 OR #165 OR #166 OR #167 OR #168 OR #169 OR #170 OR #171 OR #172 OR #173 OR #174 OR #175 OR #176 OR #177 OR #178 OR #179 OR #180 OR #181 OR #182 OR #183 OR #184 OR #185 OR #186 OR #187 OR #188 OR #189 OR #190 OR #191 OR #192 OR #193 OR #194 | 1,012,386 | 9 Apr 2020 |
| #194. | 'cohort analysis'/exp                                                                                                                                                                                                                                                                                                                                                                                                                                                                                                                                                                                        | 563,360   | 9 Apr 2020 |
| #193. | 'case control study'/exp                                                                                                                                                                                                                                                                                                                                                                                                                                                                                                                                                                                     | 170,234   | 9 Apr 2020 |
| #192. | 'observational study'/exp                                                                                                                                                                                                                                                                                                                                                                                                                                                                                                                                                                                    | 192,953   | 9 Apr 2020 |
| #191. | 'observational study':ab,ti                                                                                                                                                                                                                                                                                                                                                                                                                                                                                                                                                                                  | 124,700   | 9 Apr 2020 |
| #190. | 'study, matched case-control':ab,ti                                                                                                                                                                                                                                                                                                                                                                                                                                                                                                                                                                          | 6         | 9 Apr 2020 |
| #189. | 'studies, matched case-control':ab,ti                                                                                                                                                                                                                                                                                                                                                                                                                                                                                                                                                                        | 2         | 9 Apr 2020 |
| #188. | 'matched case-control study':ab,ti                                                                                                                                                                                                                                                                                                                                                                                                                                                                                                                                                                           | 4,504     | 9 Apr 2020 |
| #187. | 'matched case control studies':ab,ti                                                                                                                                                                                                                                                                                                                                                                                                                                                                                                                                                                         | 242       | 9 Apr 2020 |
| #186. | 'case-control study, matched':ab,ti                                                                                                                                                                                                                                                                                                                                                                                                                                                                                                                                                                          | 115       | 9 Apr 2020 |
| #185. | 'case-control studies, matched':ab,ti                                                                                                                                                                                                                                                                                                                                                                                                                                                                                                                                                                        | 7         | 9 Apr 2020 |
| #184. | 'matched case-control studies':ab,ti                                                                                                                                                                                                                                                                                                                                                                                                                                                                                                                                                                         | 242       | 9 Apr 2020 |
| #183. | 'study, nested case-control':ab,ti                                                                                                                                                                                                                                                                                                                                                                                                                                                                                                                                                                           | 13        | 9 Apr 2020 |
| #182. | 'studies, nested case-control':ab,ti                                                                                                                                                                                                                                                                                                                                                                                                                                                                                                                                                                         | 15        | 9 Apr 2020 |
| #181. | 'nested case-control study':ab,ti                                                                                                                                                                                                                                                                                                                                                                                                                                                                                                                                                                            | 8,227     | 9 Apr 2020 |
| #180. | 'nested case control studies':ab,ti                                                                                                                                                                                                                                                                                                                                                                                                                                                                                                                                                                          | 668       | 9 Apr 2020 |
| #179. | 'case-control study, nested':ab,ti                                                                                                                                                                                                                                                                                                                                                                                                                                                                                                                                                                           | 1,239     | 9 Apr 2020 |
| #178. | 'case-control studies, nested':ab,ti                                                                                                                                                                                                                                                                                                                                                                                                                                                                                                                                                                         | 80        | 9 Apr 2020 |
| #177. | 'nested case-control studies':ab,ti                                                                                                                                                                                                                                                                                                                                                                                                                                                                                                                                                                          | 668       | 9 Apr 2020 |
| #176. | 'study, case control':ab,ti                                                                                                                                                                                                                                                                                                                                                                                                                                                                                                                                                                                  | 212       | 9 Apr 2020 |
| #175. | 'studies, case control':ab,ti                                                                                                                                                                                                                                                                                                                                                                                                                                                                                                                                                                                | 513       | 9 Apr 2020 |
| #174. | 'case control study':ab,ti                                                                                                                                                                                                                                                                                                                                                                                                                                                                                                                                                                                   | 107,936   | 9 Apr 2020 |
| #173. | 'case control studies':ab,ti                                                                                                                                                                                                                                                                                                                                                                                                                                                                                                                                                                                 | 19,908    | 9 Apr 2020 |
| #172. | 'studies, case-base':ab,ti                                                                                                                                                                                                                                                                                                                                                                                                                                                                                                                                                                                   | 1         | 9 Apr 2020 |
| #171. | 'case base studies':ab,ti                                                                                                                                                                                                                                                                                                                                                                                                                                                                                                                                                                                    | 8         | 9 Apr 2020 |
| #170. | 'case-base studies':ab,ti                                                                                                                                                                                                                                                                                                                                                                                                                                                                                                                                                                                    | 8         | 9 Apr 2020 |
| #169. | 'study, case-referent':ab,ti                                                                                                                                                                                                                                                                                                                                                                                                                                                                                                                                                                                 | 1         | 9 Apr 2020 |

1  
2  
3  
4  
5  
6  
7  
8  
9  
10  
11  
12  
13  
14  
15  
16  
17  
18  
19  
20  
21  
22  
23  
24  
25  
26  
27  
28  
29  
30  
31  
32  
33  
34  
35  
36  
37  
38  
39  
40  
41  
42  
43  
44  
45  
46  
47  
48  
49  
50  
51  
52  
53  
54  
55  
56  
57  
58  
59  
60

|                                         |         |            |
|-----------------------------------------|---------|------------|
| #168.'studies, case-referent':ab,ti     | 1       | 9 Apr 2020 |
| #167.'case-referent study':ab,ti        | 523     | 9 Apr 2020 |
| #166.'case referent studies':ab,ti      | 84      | 9 Apr 2020 |
| #165.'case-referent studies':ab,ti      | 84      | 9 Apr 2020 |
| #164.'study, case-referent':ab,ti       | 9       | Apr 2020   |
| #163.'studies, case-referent':ab,ti     | 9       | Apr 2020   |
| #162.'case-referent study':ab,ti        | 1       | 9 Apr 2020 |
| #161.'case referent studies':ab,ti      | 9       | Apr 2020   |
| #160.'case-referent studies':ab,ti      | 9       | Apr 2020   |
| #159.'studies, case-compeer':ab,ti      | 1       | 9 Apr 2020 |
| #158.'case-compeer studies':ab,ti       | 1       | 9 Apr 2020 |
| #157.'study, case-comparison':ab,ti     | 9       | Apr 2020   |
| #156.'studies, case-comparison':ab,ti   | 9       | Apr 2020   |
| #155.'case-comparison study':ab,ti      | 215     | 9 Apr 2020 |
| #154.'case comparison studies':ab,ti    | 9       | 9 Apr 2020 |
| #153.'case-comparison studies':ab,ti    | 9       | 9 Apr 2020 |
| #152.'study, case-control':ab,ti        | 212     | 9 Apr 2020 |
| #151.'studies, case-control':ab,ti      | 513     | 9 Apr 2020 |
| #150.'case-control study':ab,ti         | 107,936 | 9 Apr 2020 |
| #149.'case-control studies':ab,ti       | 19,908  | 9 Apr 2020 |
| #148.'study, incidence':ab,ti           | 662     | 9 Apr 2020 |
| #147.'studies, incidence':ab,ti         | 140     | 9 Apr 2020 |
| #146.'incidence study':ab,ti            | 1,373   | 9 Apr 2020 |
| #145.'incidence studies':ab,ti          | 750     | 9 Apr 2020 |
| #144.'studies, historical cohort':ab,ti | 2       | 9 Apr 2020 |
| #143.'cohort studies, historical':ab,ti | 9       | Apr 2020   |
| #142.'study, historical cohort':ab,ti   | 20      | 9 Apr 2020 |
| #141.'historical cohort study':ab,ti    | 2,683   | 9 Apr 2020 |
| #140.'cohort study, historical':ab,ti   | 5       | 9 Apr 2020 |
| #139.'historical cohort studies':ab,ti  | 70      | 9 Apr 2020 |
| #138.'cohort analyses':ab,ti            | 809     | 9 Apr 2020 |
| #137.'analyses, cohort':ab,ti           | 30      | 9 Apr 2020 |
| #136.'cohort analysis':ab,ti            | 11,330  | 9 Apr 2020 |
| #135.'analysis, cohort':ab,ti           | 473     | 9 Apr 2020 |
| #134.'studies, closed cohort':ab,ti     | 9       | Apr 2020   |
| #133.'study, closed cohort':ab,ti       | 1       | 9 Apr 2020 |
| #132.'cohort study, closed':ab,ti       | 9       | Apr 2020   |
| #131.'closed cohort study':ab,ti        | 41      | 9 Apr 2020 |
| #130.'cohort studies, closed':ab,ti     | 9       | Apr 2020   |
| #129.'closed cohort studies':ab,ti      | 2       | 9 Apr 2020 |
| #128.'study, concurrent':ab,ti          | 148     | 9 Apr 2020 |
| #127.'concurrent study':ab,ti           | 239     | 9 Apr 2020 |
| #126.'studies, concurrent':ab,ti        | 46      | 9 Apr 2020 |
| #125.'concurrent studies':ab,ti         | 198     | 9 Apr 2020 |

|    |                                                       |                      |
|----|-------------------------------------------------------|----------------------|
| 1  |                                                       |                      |
| 2  |                                                       |                      |
| 3  | #124.'study, cohort':ab,ti                            | 21,934 9 Apr 2020    |
| 4  | #123.'studies, cohort':ab,ti                          | 490 9 Apr 2020       |
| 5  | #122.'cohort study':ab,ti                             | 260,094 9 Apr 2020   |
| 6  | #121.'cohort studies':ab,ti                           | 31,752 9 Apr 2020    |
| 7  | #120.#49 OR #50 OR #51 OR #52 OR #53 OR #54 OR #55 OR | 1,047,969 9          |
| 8  | Apr 2020                                              |                      |
| 9  |                                                       |                      |
| 10 |                                                       |                      |
| 11 | #56 OR #57 OR #58 OR #59 OR #60 OR #61 OR #62 OR      |                      |
| 12 | #63 OR #64 OR #65 OR #66 OR #67 OR #68 OR #69 OR      |                      |
| 13 | #70 OR #71 OR #72 OR #73 OR #74 OR #75 OR #76 OR      |                      |
| 14 | #77 OR #78 OR #79 OR #80 OR #81 OR #82 OR #83 OR      |                      |
| 15 | #84 OR #85 OR #86 OR #87 OR #88 OR #89 OR #90 OR      |                      |
| 16 | #91 OR #92 OR #93 OR #94 OR #95 OR #96 OR #97 OR      |                      |
| 17 | #98 OR #99 OR #100 OR #101 OR #102 OR #103 OR         |                      |
| 18 | #104 OR #105 OR #106 OR #107 OR #108 OR #109 OR       |                      |
| 19 | #110 OR #111 OR #112 OR #113 OR #114 OR #115 OR       |                      |
| 20 | #116 OR #117 OR #118 OR #119                          |                      |
| 21 |                                                       |                      |
| 22 |                                                       |                      |
| 23 |                                                       |                      |
| 24 | #119.'pregnancy diabetes mellitus'/exp                | 36,590 9 Apr 2020    |
| 25 | #118.'non insulin dependent diabetes mellitus'/exp    | 253,232 9 Apr 2020   |
| 26 | #117.'insulin dependent diabetes mellitus'/exp        | 117,492 9 Apr 2020   |
| 27 | #116.'diabetes mellitus'/exp                          | 1,001,964 9 Apr 2020 |
| 28 | #115.'gestational diabetes mellitus':ab,ti            | 11,376 9 Apr 2020    |
| 29 | #114.'diabetes mellitus, gestational':ab,ti           | 91 9 Apr 2020        |
| 30 | #113.'gestational diabetes':ab,ti                     | 22,863 9 Apr 2020    |
| 31 | #112.'pregnancy-induced diabetes':ab,ti               | 14 9 Apr 2020        |
| 32 | #111.'diabetes, pregnancy induced':ab,ti              | 57 9 Apr 2020        |
| 33 | #110.'diabetes, pregnancy-induced':ab,ti              | 57 9 Apr 2020        |
| 34 | #109.'diabetes, gestational':ab,ti                    | 313 9 Apr 2020       |
| 35 | #108.'ketosis-prone diabetes mellitus':ab,ti          | 16 9 Apr 2020        |
| 36 | #107.'diabetes mellitus, ketosis prone':ab,ti         | 9 Apr 2020           |
| 37 | #106.'diabetes mellitus, ketosis-prone':ab,ti         | 9 Apr 2020           |
| 38 | #105.'brittle diabetes mellitus':ab,ti                | 26 9 Apr 2020        |
| 39 | #104.'diabetes mellitus, brittle':ab,ti               | 3 9 Apr 2020         |
| 40 | #103.'autoimmune diabetes':ab,ti                      | 4,106 9 Apr 2020     |
| 41 | #102.'diabetes, autoimmune':ab,ti                     | 213 9 Apr 2020       |
| 42 | #101.'diabetes, type 1':ab,ti                         | 1,452 9 Apr 2020     |
| 43 | #100.'type 1 diabetes':ab,ti                          | 60,696 9 Apr 2020    |
| 44 | #99.'insulin dependent diabetes mellitus 1':ab,ti     | 31 9 Apr 2020        |
| 45 | #98.'insulin-dependent diabetes mellitus 1':ab,ti     | 31 9 Apr 2020        |
| 46 | #97.'diabetes mellitus, insulin-dependent, 1':ab,ti   | 9 Apr 2020           |
| 47 | #96.'type 1 diabetes mellitus':ab,ti                  | 14,962 9 Apr 2020    |
| 48 | #95.'sudden-onset diabetes mellitus':ab,ti            | 1 9 Apr 2020         |
| 49 | #94.'diabetes mellitus, sudden onset':ab,ti           | 1 9 Apr 2020         |
| 50 | #93.'diabetes mellitus, sudden-onset':ab,ti           | 1 9 Apr 2020         |
| 51 | #92.'juvenile onset diabetes':ab,ti                   | 494 9 Apr 2020       |
| 52 |                                                       |                      |
| 53 |                                                       |                      |
| 54 |                                                       |                      |
| 55 |                                                       |                      |
| 56 |                                                       |                      |
| 57 |                                                       |                      |
| 58 |                                                       |                      |
| 59 |                                                       |                      |
| 60 |                                                       |                      |

|    |                                                       |                    |
|----|-------------------------------------------------------|--------------------|
| 1  |                                                       |                    |
| 2  |                                                       |                    |
| 3  |                                                       |                    |
| 4  | #91. 'diabetes, juvenile-onset':ab,ti                 | 4 9 Apr 2020       |
| 5  | #90. 'juvenile-onset diabetes':ab,ti                  | 494 9 Apr 2020     |
| 6  | #89. 'iddm':ab,ti                                     | 7,833 9 Apr 2020   |
| 7  | #88. 'juvenile-onset diabetes mellitus':ab,ti         | 232 9 Apr 2020     |
| 8  | #87. 'diabetes mellitus, juvenile onset':ab,ti        | 3 9 Apr 2020       |
| 9  | #86. 'diabetes mellitus, juvenile-onset':ab,ti        | 3 9 Apr 2020       |
| 10 | #85. 'insulin-dependent diabetes mellitus':ab,ti      | 17,759 9 Apr 2020  |
| 11 | #84. 'diabetes mellitus, insulin dependent':ab,ti     | 47 9 Apr 2020      |
| 12 | #83. 'diabetes mellitus, insulin-dependent':ab,ti     | 47 9 Apr 2020      |
| 13 | #82. 'diabetes mellitus, type 1':ab,ti                | 1,786 9 Apr 2020   |
| 14 | #81. 'diabetes mellitus, adult onset':ab,ti           | 3 9 Apr 2020       |
| 15 | #80. 'adult-onset diabetes mellitus':ab,ti            | 193 9 Apr 2020     |
| 16 | #79. 'diabetes mellitus, adult-onset':ab,ti           | 3 9 Apr 2020       |
| 17 | #78. 'diabetes, type 2':ab,ti                         | 2,279 9 Apr 2020   |
| 18 | #77. 'type 2 diabetes':ab,ti                          | 185,187 9 Apr 2020 |
| 19 | #76. 'maturity onset diabetes':ab,ti                  | 2,618 9 Apr 2020   |
| 20 | #75. 'diabetes, maturity-onset':ab,ti                 | 43 9 Apr 2020      |
| 21 | #74. 'maturity-onset diabetes':ab,ti                  | 2,618 9 Apr 2020   |
| 22 | #73. 'noninsulin dependent diabetes mellitus':ab,ti   | 1,037 9 Apr 2020   |
| 23 | #72. 'noninsulin-dependent diabetes mellitus':ab,ti   | 1,037 9 Apr 2020   |
| 24 | #71. 'type 2 diabetes mellitus':ab,ti                 | 61,709 9 Apr 2020  |
| 25 | #70. 'slow-onset diabetes mellitus':ab,ti             | 9 Apr 2020         |
| 26 | #69. 'diabetes mellitus, slow onset':ab,ti            | 1 9 Apr 2020       |
| 27 | #68. 'diabetes mellitus, slow-onset':ab,ti            | 1 9 Apr 2020       |
| 28 | #67. 'mody':ab,ti                                     | 2,136 9 Apr 2020   |
| 29 | #66. 'maturity onset diabetes mellitus':ab,ti         | 183 9 Apr 2020     |
| 30 | #65. 'maturity-onset diabetes mellitus':ab,ti         | 183 9 Apr 2020     |
| 31 | #64. 'diabetes mellitus, maturity onset':ab,ti        | 14 9 Apr 2020      |
| 32 | #63. 'diabetes mellitus, maturity-onset':ab,ti        | 14 9 Apr 2020      |
| 33 | #62. 'diabetes mellitus, noninsulin dependent':ab,ti  | 4 9 Apr 2020       |
| 34 | #61. 'niddm':ab,ti                                    | 7,991 9 Apr 2020   |
| 35 | #60. 'diabetes mellitus, type ii':ab,ti               | 1,081 9 Apr 2020   |
| 36 | #59. 'stable diabetes mellitus':ab,ti                 | 28 9 Apr 2020      |
| 37 | #58. 'diabetes mellitus, stable':ab,ti                | 16 9 Apr 2020      |
| 38 | #57. 'non-insulin-dependent diabetes mellitus':ab,ti  | 7,743 9 Apr 2020   |
| 39 | #56. 'diabetes mellitus, non-insulin-dependent':ab,ti | 40 9 Apr 2020      |
| 40 | #55. 'diabetes mellitus, non insulin dependent':ab,ti | 40 9 Apr 2020      |
| 41 | #54. 'ketosis-resistant diabetes mellitus':ab,ti      | 2 9 Apr 2020       |
| 42 | #53. 'diabetes mellitus, ketosis resistant':ab,ti     | 9 Apr 2020         |
| 43 | #52. 'diabetes mellitus, ketosis-resistant':ab,ti     | 9 Apr 2020         |
| 44 | #51. 'diabetes mellitus, noninsulin-dependent':ab,ti  | 4 9 Apr 2020       |
| 45 | #50. 'diabetes mellitus, type 2':ab,ti                | 4,600 9 Apr 2020   |
| 46 | #49. 'diabetes mellitus':ab,ti                        | 278,869 9 Apr 2020 |
| 47 | #48. #1 OR #2 OR #3 OR #4 OR #5 OR #6 OR #7 OR #8 OR  | 161,803 9 Apr 2020 |

1  
2  
3  
4  
5  
6  
7  
8  
9  
10  
11  
12  
13  
14  
15  
16  
17  
18  
19  
20  
21  
22  
23  
24  
25  
26  
27  
28  
29  
30  
31  
32  
33  
34  
35  
36  
37  
38  
39  
40  
41  
42  
43  
44  
45  
46  
47  
48  
49  
50  
51  
52  
53  
54  
55  
56  
57  
58  
59  
60

#9 OR #10 OR #11 OR #12 OR #13 OR #14 OR #15 OR  
 #16 OR #17 OR #18 OR #19 OR #20 OR #21 OR #22 OR  
 #23 OR #24 OR #25 OR #26 OR #27 OR #28 OR #29 OR  
 #30 OR #31 OR #32 OR #33 OR #34 OR #35 OR #36 OR  
 #37 OR #38 OR #39 OR #40 OR #41 OR #42 OR #43 OR  
 #44 OR #45 OR #46 OR #47

|                                             |         |            |
|---------------------------------------------|---------|------------|
| #47. 'ovary cancer'/exp                     | 120,100 | 9 Apr 2020 |
| #46. 'ovary tumor'/exp                      | 150,462 | 9 Apr 2020 |
| #45. 'ovary tumor':ab,ti                    | 129     | 9 Apr 2020 |
| #44. 'ovarian tumor':ab,ti                  | 7,638   | 9 Apr 2020 |
| #43. 'ovarian carcinoma':ab,ti              | 17,377  | 9 Apr 2020 |
| #42. 'ovarian carcinomas, epithelial':ab,ti | 1       | 9 Apr 2020 |
| #41. 'ovarian carcinoma, epithelial':ab,ti  | 6       | 9 Apr 2020 |
| #40. 'epithelial ovarian carcinomas':ab,ti  | 459     | 9 Apr 2020 |
| #39. 'carcinomas, epithelial ovarian':ab,ti | 2       | 9 Apr 2020 |
| #38. 'carcinoma, epithelial ovarian':ab,ti  | 6       | 9 Apr 2020 |
| #37. 'epithelial ovarian carcinoma':ab,ti   | 2,143   | 9 Apr 2020 |
| #36. 'ovarian epithelial carcinoma':ab,ti   | 290     | 9 Apr 2020 |
| #35. 'ovarian cancers, epithelial':ab,ti    | 1       | 9 Apr 2020 |
| #34. 'epithelial ovarian cancers':ab,ti     | 1,189   | 9 Apr 2020 |
| #33. 'cancers, epithelial ovarian':ab,ti    | 7       | 9 Apr 2020 |
| #32. 'cancer, epithelial ovarian':ab,ti     | 21      | 9 Apr 2020 |
| #31. 'ovarian cancer, epithelial':ab,ti     | 43      | 9 Apr 2020 |
| #30. 'ovarian epithelial cancers':ab,ti     | 100     | 9 Apr 2020 |
| #29. 'epithelial cancers, ovarian':ab,ti    | 1       | 9 Apr 2020 |
| #28. 'epithelial cancer, ovarian':ab,ti     | 4       | 9 Apr 2020 |
| #27. 'cancers, ovarian epithelial':ab,ti    | 9       | Apr 2020   |
| #26. 'cancer, ovarian epithelial':ab,ti     | 3       | 9 Apr 2020 |
| #25. 'ovarian epithelial cancer':ab,ti      | 414     | 9 Apr 2020 |
| #24. 'epithelial ovarian cancer':ab,ti      | 13,087  | 9 Apr 2020 |
| #23. 'ovarian epithelial carcinomas':ab,ti  | 84      | 9 Apr 2020 |
| #22. 'epithelial carcinomas, ovarian':ab,ti | 9       | Apr 2020   |
| #21. 'epithelial carcinoma, ovarian':ab,ti  | 1       | 9 Apr 2020 |
| #20. 'carcinomas, ovarian epithelial':ab,ti | 1       | 9 Apr 2020 |
| #19. 'carcinoma, ovarian epithelial':ab,ti  | 2       | 9 Apr 2020 |
| #18. 'cancer of the ovary':ab,ti            | 735     | 9 Apr 2020 |
| #17. 'cancer of ovary':ab,ti                | 32      | 9 Apr 2020 |
| #16. 'ovarian cancers':ab,ti                | 8,913   | 9 Apr 2020 |
| #15. 'cancers, ovarian':ab,ti               | 139     | 9 Apr 2020 |
| #14. 'cancer, ovarian':ab,ti                | 1,121   | 9 Apr 2020 |
| #13. 'ovarian cancer':ab,ti                 | 76,611  | 9 Apr 2020 |
| #12. 'ovary cancers':ab,ti                  | 89      | 9 Apr 2020 |
| #11. 'cancers, ovary':ab,ti                 | 12      | 9 Apr 2020 |
| #10. 'cancer, ovary':ab,ti                  | 65      | 9 Apr 2020 |

|    |     |                            |                  |
|----|-----|----------------------------|------------------|
| 1  |     |                            |                  |
| 2  |     |                            |                  |
| 3  |     |                            |                  |
| 4  | #9. | 'ovary cancer':ab,ti       | 595 9 Apr 2020   |
| 5  | #8. | 'neoplasms, ovarian':ab,ti | 23 9 Apr 2020    |
| 6  | #7. | 'ovary neoplasm':ab,ti     | 7 9 Apr 2020     |
| 7  | #6. | 'neoplasms, ovary':ab,ti   | 5 9 Apr 2020     |
| 8  | #5. | 'neoplasm, ovary':ab,ti    | 2 9 Apr 2020     |
| 9  | #4. | 'ovarian neoplasm':ab,ti   | 760 9 Apr 2020   |
| 10 | #3. | 'ovary neoplasms':ab,ti    | 14 9 Apr 2020    |
| 11 | #2. | 'neoplasm, ovarian':ab,ti  | 13 9 Apr 2020    |
| 12 | #1. | 'ovarian neoplasms':ab,ti  | 1,859 9 Apr 2020 |
| 13 |     |                            |                  |
| 14 |     |                            |                  |
| 15 |     |                            |                  |
| 16 |     |                            |                  |
| 17 |     |                            |                  |
| 18 |     |                            |                  |
| 19 |     |                            |                  |
| 20 |     |                            |                  |
| 21 |     |                            |                  |
| 22 |     |                            |                  |
| 23 |     |                            |                  |
| 24 |     |                            |                  |
| 25 |     |                            |                  |
| 26 |     |                            |                  |
| 27 |     |                            |                  |
| 28 |     |                            |                  |
| 29 |     |                            |                  |
| 30 |     |                            |                  |
| 31 |     |                            |                  |
| 32 |     |                            |                  |
| 33 |     |                            |                  |
| 34 |     |                            |                  |
| 35 |     |                            |                  |
| 36 |     |                            |                  |
| 37 |     |                            |                  |
| 38 |     |                            |                  |
| 39 |     |                            |                  |
| 40 |     |                            |                  |
| 41 |     |                            |                  |
| 42 |     |                            |                  |
| 43 |     |                            |                  |
| 44 |     |                            |                  |
| 45 |     |                            |                  |
| 46 |     |                            |                  |
| 47 |     |                            |                  |
| 48 |     |                            |                  |
| 49 |     |                            |                  |
| 50 |     |                            |                  |
| 51 |     |                            |                  |
| 52 |     |                            |                  |
| 53 |     |                            |                  |
| 54 |     |                            |                  |
| 55 |     |                            |                  |
| 56 |     |                            |                  |
| 57 |     |                            |                  |
| 58 |     |                            |                  |
| 59 |     |                            |                  |
| 60 |     |                            |                  |

For peer review only

Additional file 3 Quality assessment of included studies based on the Newcastle-Ottawa Scale score

Cohort studies

| Study ID        | Representativeness of the exposed cohort | Selection of the non-exposed cohort | Ascertainment of exposure | Demonstration that outcome of interest was not present at start of study | Comparability of cohorts on the basis of the design or analysis <sup>∞</sup> | Assessment of outcome | Was follow-up long enough for outcomes to occur | Adequacy of follow-up of cohorts | Total stars |
|-----------------|------------------------------------------|-------------------------------------|---------------------------|--------------------------------------------------------------------------|------------------------------------------------------------------------------|-----------------------|-------------------------------------------------|----------------------------------|-------------|
| Weiderpass 2002 | ★                                        | ★                                   | ★                         | ★                                                                        | ★                                                                            | ★                     | ★                                               | ★                                | 8           |
| Zendejdel 2003  | ★                                        | ★                                   | ★                         | ★                                                                        | ★                                                                            | ★                     | ★                                               | ...                              | 7           |
| Swerdlow 2005   | ★                                        | ★                                   | ★                         | ...                                                                      | ★                                                                            | ★                     | ★                                               | ★                                | 7           |
| Inoue 2006      | ★                                        | ★                                   | ★                         | ★                                                                        | ★                                                                            | ★                     | ★                                               | ★                                | 8           |
| Khan 2006       | ★                                        | ★                                   | ★                         | ★                                                                        | ★                                                                            | ★                     | ...                                             | ★                                | 7           |
| Hemminki 2010   | ★                                        | ★                                   | ★                         | ★                                                                        | ★                                                                            | ★                     | ★                                               | ...                              | 7           |
| Chodick 2010    | ★                                        | ★                                   | ★                         | ★                                                                        | ★                                                                            | ★                     | ...                                             | ★                                | 7           |
| Shu 2010        | ★                                        | ★                                   | ★                         | ★                                                                        | ★                                                                            | ★                     | ★                                               | ★                                | 8           |
| Wotton 2011     | ...                                      | ★                                   | ★                         | ★                                                                        | ★                                                                            | ★                     | ★                                               | ★                                | 7           |
| Johnson 2011    | ★                                        | ★                                   | ★                         | ★                                                                        | ★                                                                            | ★                     | ...                                             | ★                                | 7           |
| Lambe 2011      | ★                                        | ★                                   | ★                         | ★                                                                        | ★                                                                            | ★                     | ★                                               | ★                                | 8           |
| Gapstur 2012    | ★                                        | ★                                   | ★                         | ★                                                                        | ★                                                                            | ★                     | ...                                             | ★                                | 7           |
| Lo 2013         | ★                                        | ★                                   | ★                         | ★                                                                        | ★                                                                            | ★                     | ...                                             | ★                                | 7           |
| Chen 2014       | ★                                        | ★                                   | ★                         | ★                                                                        | ★★                                                                           | ★                     | ★                                               | ★                                | 9           |
| Hsu 2015        | ★                                        | ★                                   | ★                         | ★                                                                        | ★                                                                            | ★                     | ...                                             | ★                                | 7           |

|                                 |     |   |   |     |     |   |     |     |   |
|---------------------------------|-----|---|---|-----|-----|---|-----|-----|---|
| Harding 2015                    | ★   | ★ | ★ | ★   | ... | ★ | ★   | ★   | 7 |
| Dankner 2016                    | ★   | ★ | ★ | ★   | ★   | ★ | ★   | ★   | 8 |
| Carstensen 2016                 | ★   | ★ | ★ | ★   | ★   | ★ | ★   | ... | 7 |
| Fuchs 2017                      | ★   | ★ | ★ | ★   | ... | ★ | ★   | ★   | 7 |
| Ballotari 2017                  | ★   | ★ | ★ | ... | ★   | ★ | ★   | ... | 6 |
| He 2018                         | ★   | ★ | ★ | ★   | ★   | ★ | ... | ★   | 7 |
| Han 2018                        | ★   | ★ | ★ | ★   | ★   | ★ | ★   | ★   | 8 |
| Bao 2018                        | ... | ★ | ★ | ★   | ★   | ★ | ... | ★   | 6 |
| Saarela 2019                    | ★   | ★ | ★ | ★   | ... | ★ | ★   | ... | 6 |
| Linkeviciute-Ulinskiene<br>2019 | ★   | ★ | ★ | ★   | ... | ★ | ★   | ★   | 7 |
| Peng 2019                       | ★   | ★ | ★ | ★   | ★   | ★ | ... | ★   | 7 |
| Pace 2020                       | ★   | ★ | ★ | ★   | ★   | ★ | ★   | ... | 7 |



1  
2  
3  
4  
5  
6  
7  
8  
9  
10  
11  
12  
13  
14  
15  
16  
17  
18  
19  
20  
21  
22  
23  
24  
25  
26  
27  
28  
29  
30  
31  
32  
33  
34  
35  
36  
37  
38  
39  
40  
41  
42  
43  
44  
45  
46

**Case-control studies**

| Study ID       | Is the case definition adequate | Representativeness of the cases | Selection of the controls | Definition of controls | Comparability of cases and controls on the basis of the design or analysis | Ascertainment of exposure | Same method of ascertainment for cases and controls | Non-response rate | Total stars |
|----------------|---------------------------------|---------------------------------|---------------------------|------------------------|----------------------------------------------------------------------------|---------------------------|-----------------------------------------------------|-------------------|-------------|
| O'Mara 1985    | ★                               | ★                               | ...                       | ★                      | ★                                                                          | ...                       | ★                                                   | ...               | 5           |
| Adler 1996     | ★                               | ★                               | ★                         | ...                    | ...                                                                        | ★                         | ★                                                   | ...               | 5           |
| Parazzini 1997 | ★                               | ★                               | ...                       | ★                      | ★                                                                          | ...                       | ★                                                   | ...               | 5           |
| Mori 1998      | ★                               | ★                               | ★                         | ★                      | ★                                                                          | ...                       | ★                                                   | ★                 | 7           |
| Kuriki 2007    | ★                               | ★                               | ★                         | ...                    | ...                                                                        | ★                         | ★                                                   | ★                 | 6           |
| Reis 2010      | ★                               | ★                               | ...                       | ★                      | ...                                                                        | ★                         | ★                                                   | ★                 | 6           |
| Attner 2012    | ★                               | ★                               | ★                         | ★                      | ★                                                                          | ★                         | ★                                                   | ...               | 7           |
| Bosetti 2012   | ★                               | ★                               | ...                       | ★                      | ★                                                                          | ...                       | ★                                                   | ...               | 5           |
| Ruiz 2016      | ★                               | ★                               | ...                       | ★                      | ★                                                                          | ...                       | ★                                                   | ...               | 5           |

One star is awarded if matched on, or adjusted for maternal age; another star is awarded if other confounders are taken into account.

### Additional file 4 Sensitivity analysis and assessment of reporting biases & Forest plots for the subgroup analyses of DM and subsequent risk of OC

#### Sensitivity analysis

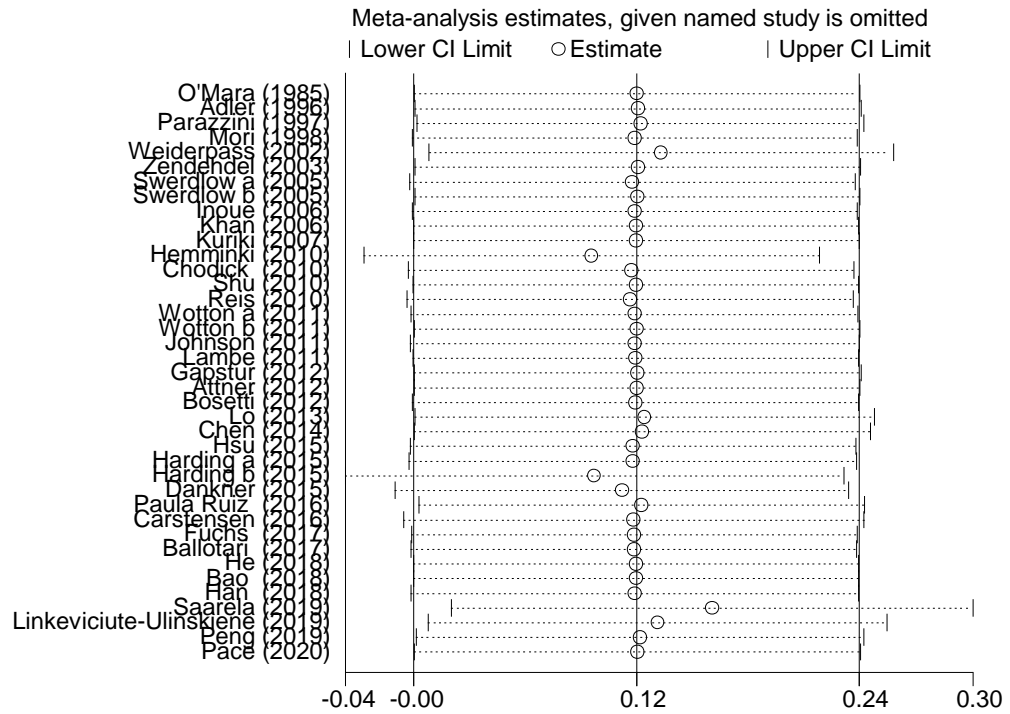

#### Assessment of reporting biases Funnel plot

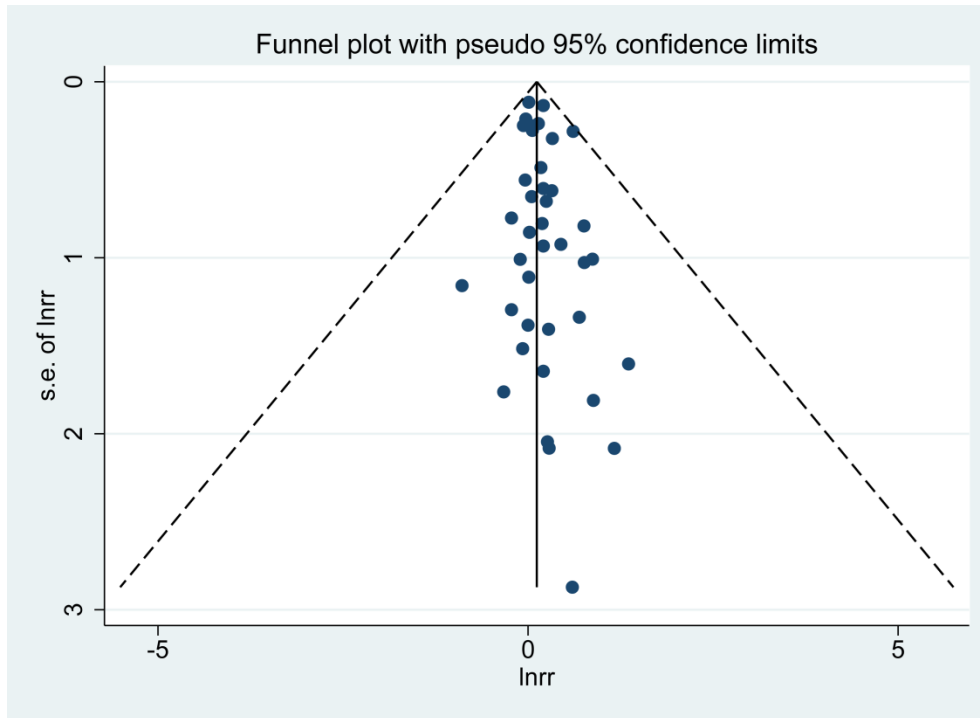

### Begg's Test

Begg's Test

adj. Kendall's Score (P-Q) = 97  
 Std. Dev. of Score = 82.67  
 Number of Studies = 39  
 z = 1.17  
 Pr > |z| = 0.241  
 z = 1.16 (continuity corrected)  
 Pr > |z| = 0.246 (continuity corrected)

### Egger's test

|       | Std_Eff | Coef.    | Std. Err. | t    | P> t  | [95% Conf. Interval] |
|-------|---------|----------|-----------|------|-------|----------------------|
| slope | +       | .0705791 | .0441485  | 1.60 | 0.118 | -.0188741 .1600324   |
| bias  |         | .6885655 | .4468107  | 1.54 | 0.132 | -.2167589 1.59389    |

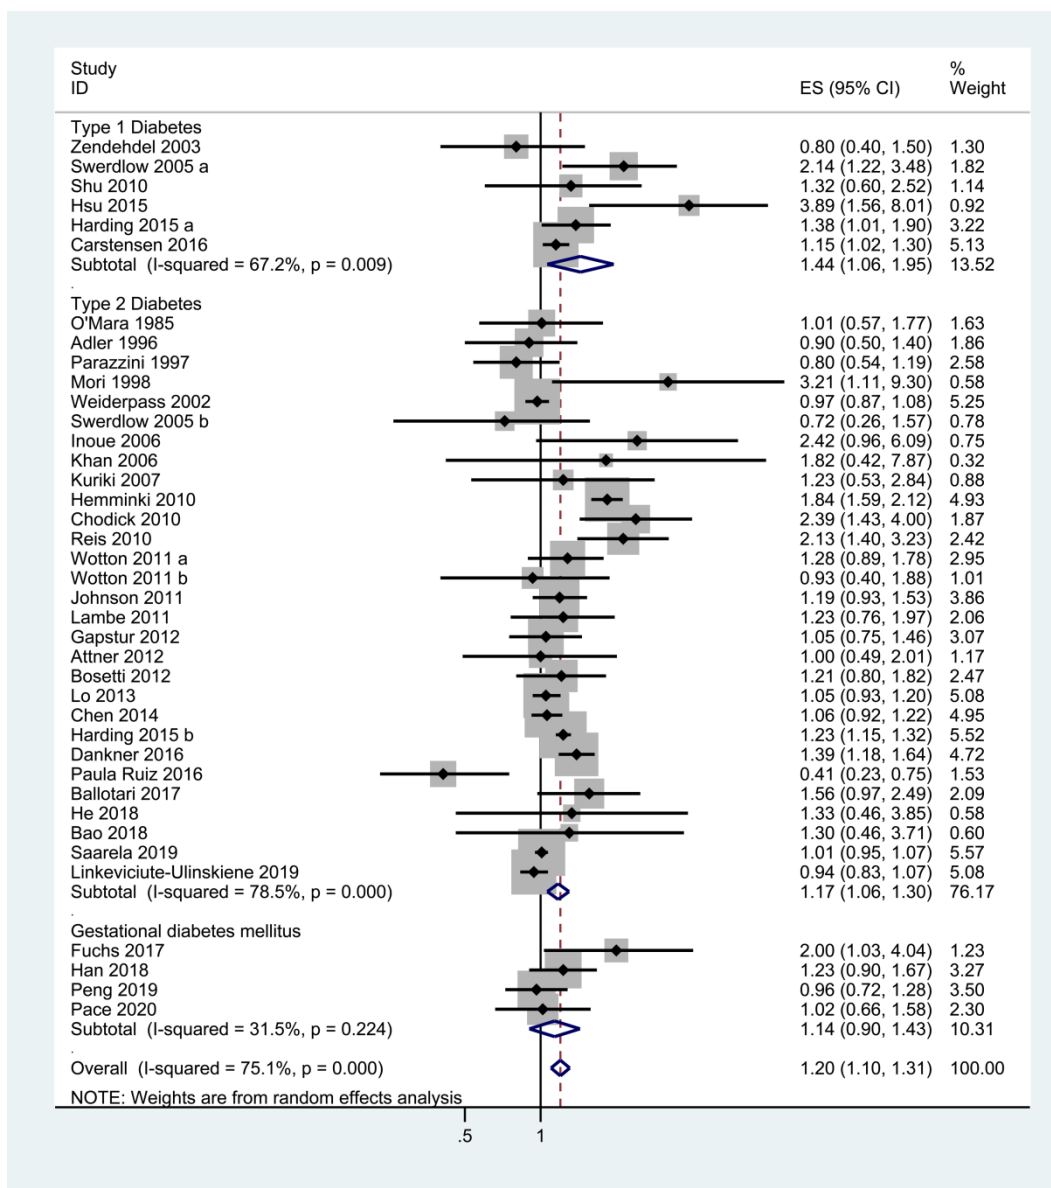

a. Subgroup analysis based on the DM types (type 1 DM vs. type 2 DM vs. GDM). RR relative risk, CI confidence interval, DM diabetes mellitus, GDM gestational DM.

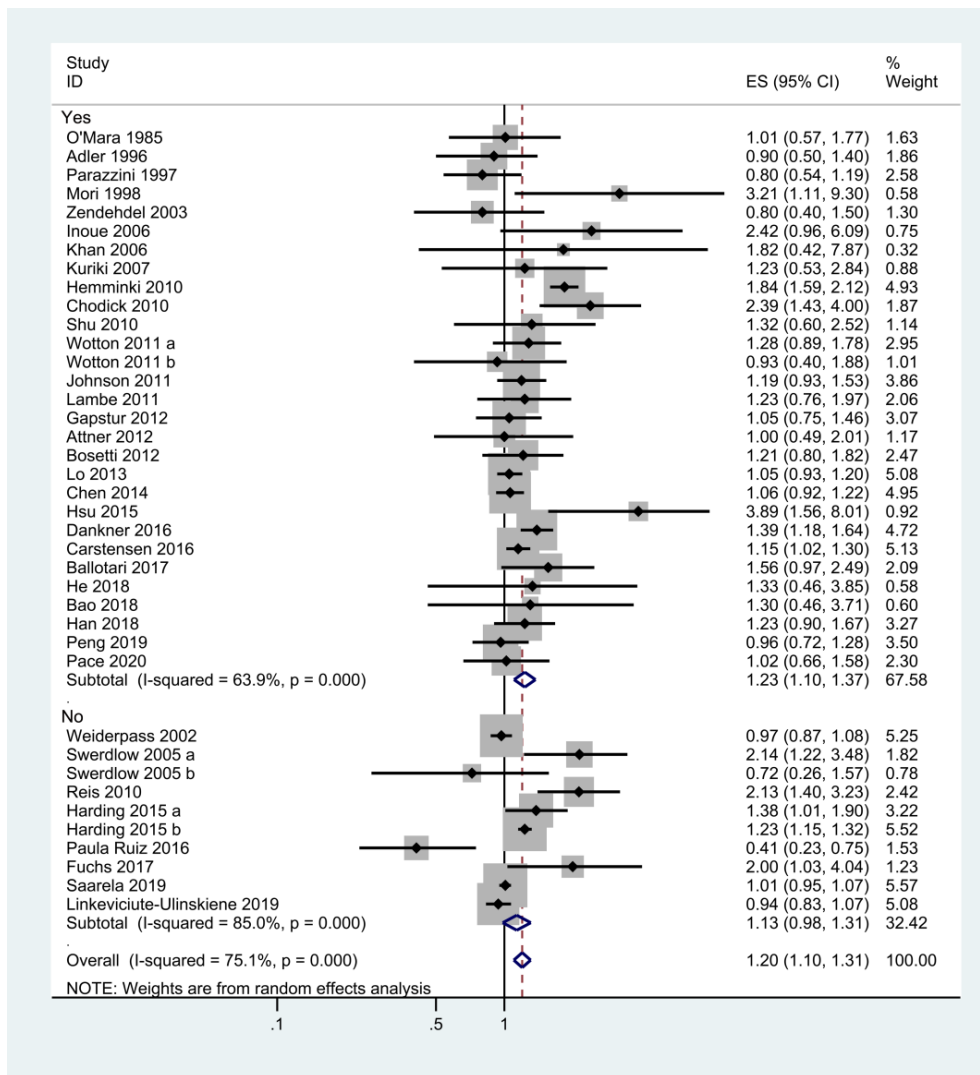

b. Subgroup analysis based on the level of adjustment (unadjusted vs. adjusted). RR relative risk, CI confidence interval.

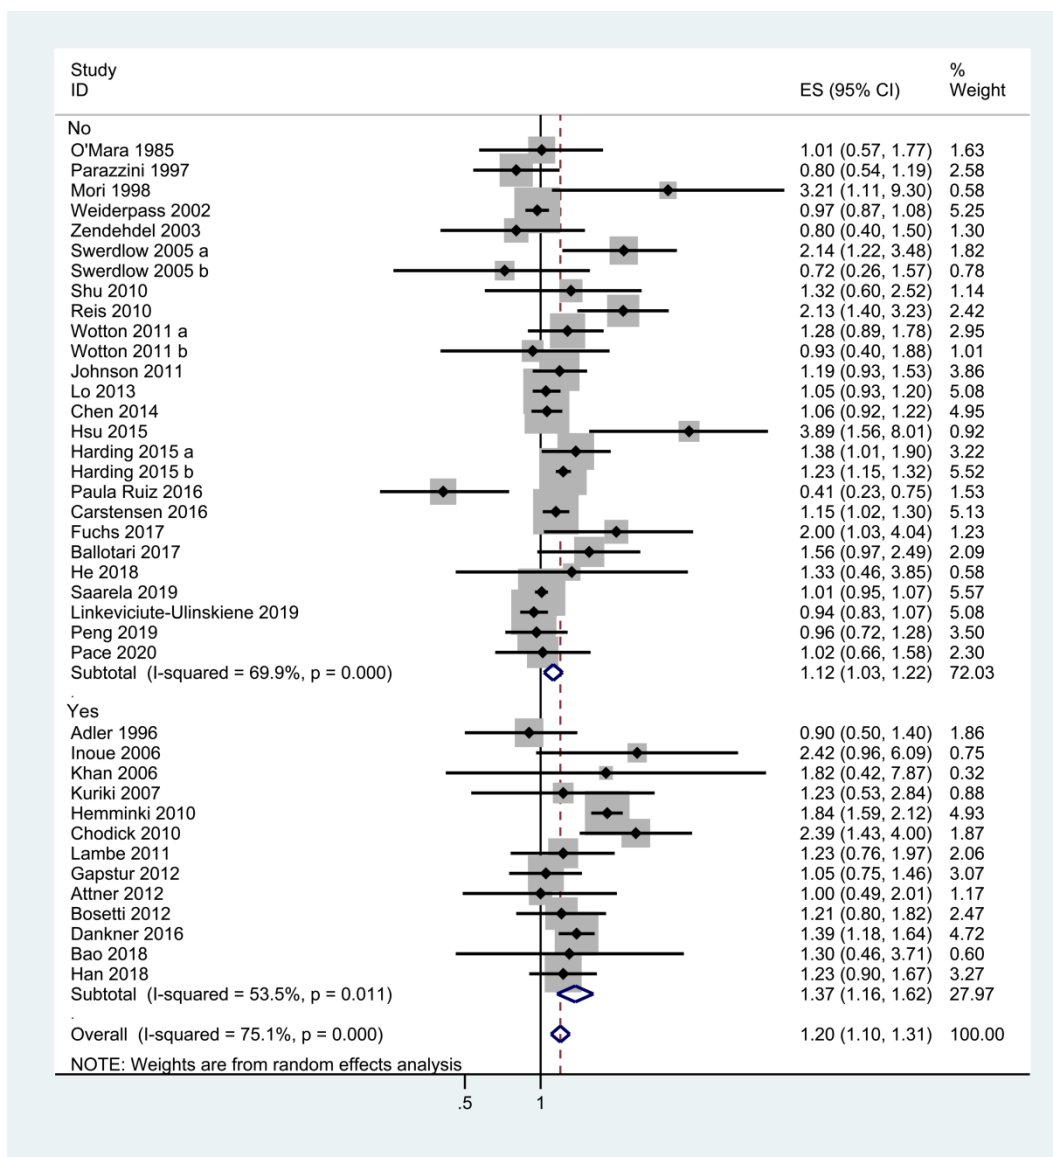

c. Subgroup analysis based on whether the study adjusted for BMI (yes vs. no). RR relative risk, CI confidence interval, BMI body mass index.

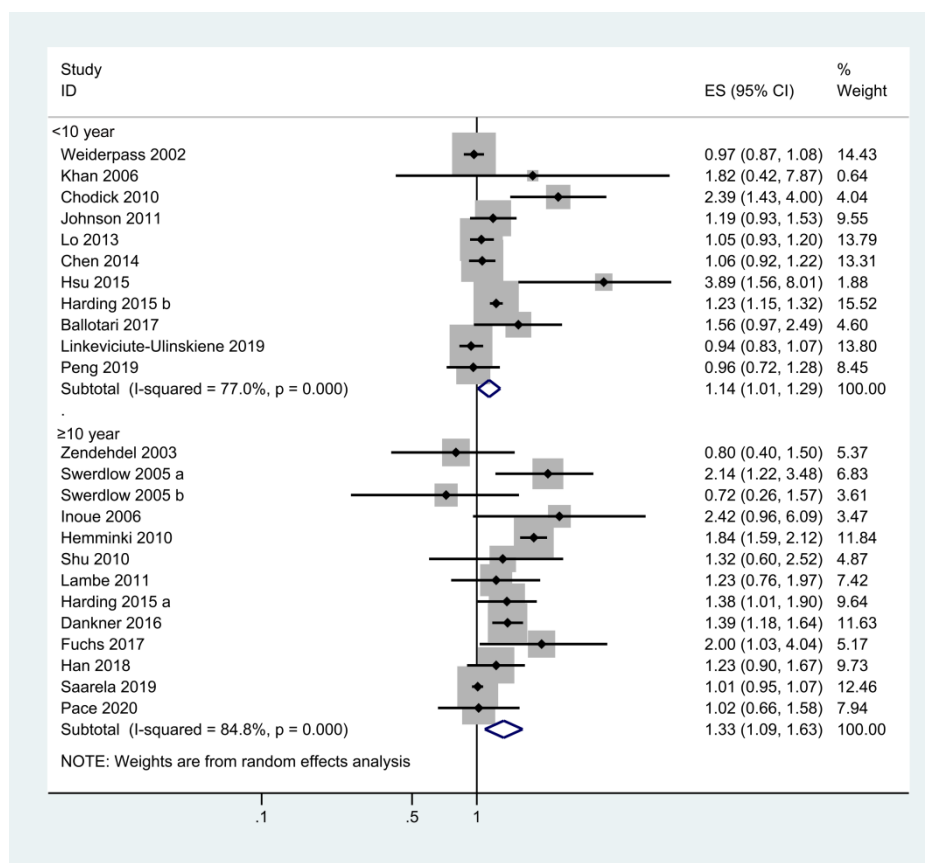

d. Subgroup analysis based on the duration of follow-up (<10 year vs.  $\geq 10$  year).  
RR relative risk, CI confidence interval.

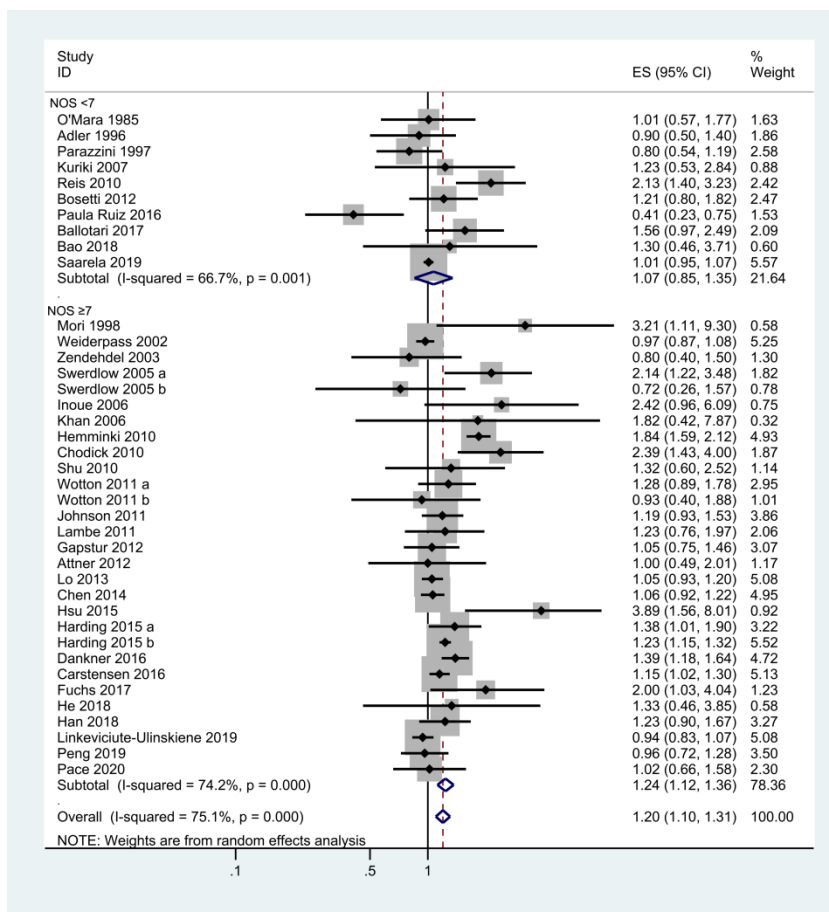

e. Subgroup analysis based on the study quality (NOS <7 vs. ≥7 points). RR relative risk, CI confidence interval, NOS the Newcastle-Ottawa Scale score.



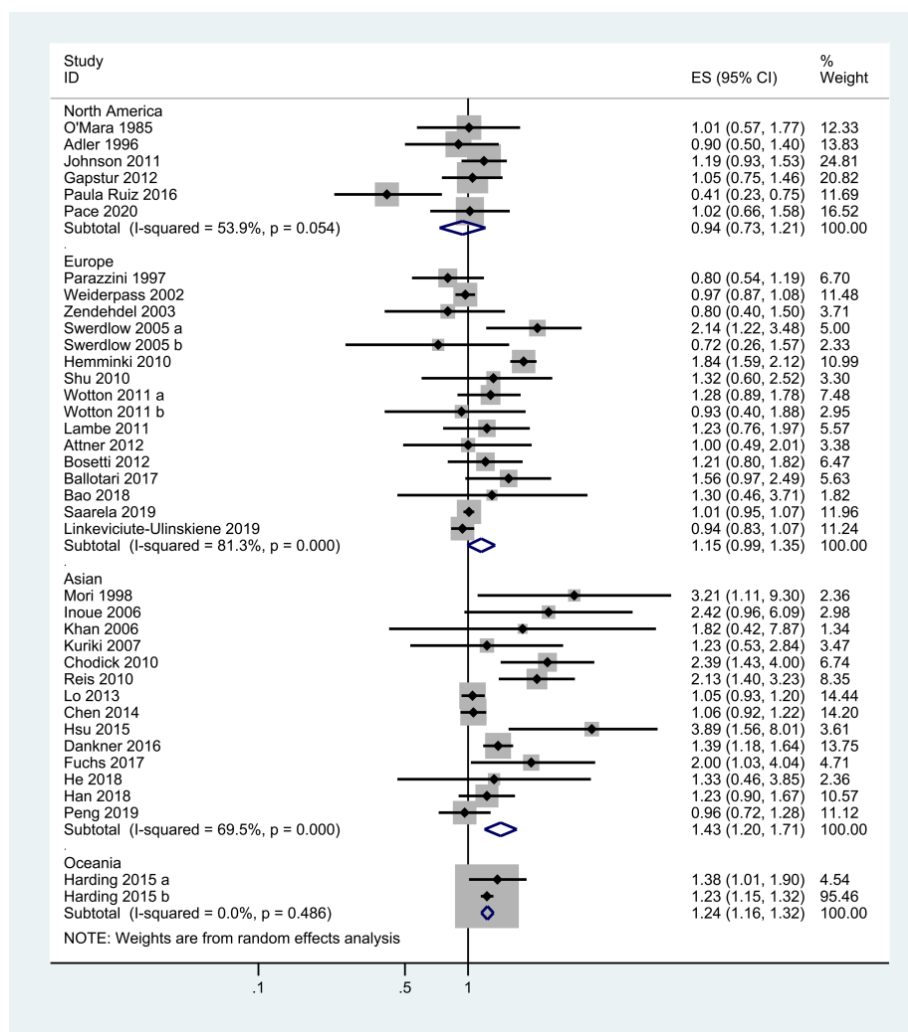

f. Subgroup analysis based on the geographic areas (North America vs. Europe vs. Asian vs. Oceania). RR relative risk, CI confidence interval.
