# Supplementary material for: Diabetes mellitus and the risk of ovarian cancer: a systematic review and meta-analysis of cohort and case–control studies
Source: PubMed Central journal article supplement — BMJ Open. 2020 Dec 29;10(12):e040137. doi: 10.1136/bmjopen-2020-040137 (PMC7778773; doi:10.1136/bmjopen-2020-040137), 2020-12-29
Supplement: bmjopen-2020-040137supp002.pdf [file bmjopen-2020-040137supp002.pdf]

**Additional file 2: The search strategy and search results**

PubMed (n=105), the Cochrane library databases(n=165) and Embase (n=273)

**PubMed:**

#1 (((((((((((((((("Ovarian Neoplasms"[Mesh]) OR "Ovarian Neoplasms"[Title/Abstract]) OR "Neoplasm, Ovarian"[Title/Abstract]) OR "Ovarian Neoplasm"[Title/Abstract]) OR "Ovary Neoplasms"[Title/Abstract]) OR "Neoplasm, Ovary"[Title/Abstract]) OR "Ovary Neoplasm"[Title/Abstract]) OR "Neoplasms, Ovarian"[Title/Abstract]) OR "Ovary Cancer"[Title/Abstract]) OR "Cancer, Ovary"[Title/Abstract]) OR "Ovary Cancers"[Title/Abstract]) OR "Ovarian Cancer"[Title/Abstract]) OR "Cancer, Ovarian"[Title/Abstract]) OR "Ovarian Cancers"[Title/Abstract]) OR "Cancer of Ovary"[Title/Abstract]) OR "Cancer of the Ovary"[Title/Abstract])) OR (((((((((((((((("Carcinoma, Ovarian Epithelial"[Mesh]) OR "Ovarian Epithelial Carcinomas"[Title/Abstract]) OR "Epithelial Ovarian Cancer"[Title/Abstract]) OR "Ovarian Epithelial Cancers"[Title/Abstract]) OR "Ovarian Epithelial Cancer"[Title/Abstract]) OR "Epithelial Ovarian Cancers"[Title/Abstract]) OR "Ovarian Epithelial Carcinoma"[Title/Abstract]) OR "Epithelial Ovarian Carcinoma"[Title/Abstract]) OR "Epithelial Ovarian Carcinomas"[Title/Abstract]) OR "ovarian carcinoma"[Title/Abstract])))) 101778

#2 (((("diabete\*"[Title/Abstract]) OR (((((((((((((((("Diabetes Mellitus, Type 1"[Title/Abstract]) OR "Insulin-Dependent Diabetes Mellitus"[Title/Abstract]) OR "Juvenile-Onset Diabetes Mellitus"[Title/Abstract]) OR "IDDM"[Title/Abstract]) OR "Juvenile-Onset Diabetes"[Title/Abstract]) OR "Juvenile Onset Diabetes"[Title/Abstract]) OR "Sudden-Onset Diabetes Mellitus"[Title/Abstract]) OR "Type 1 Diabetes Mellitus"[Title/Abstract]) OR "Insulin-Dependent Diabetes Mellitus 1"[Title/Abstract]) OR "Insulin Dependent Diabetes Mellitus 1"[Title/Abstract]) OR "Type 1 Diabetes"[Title/Abstract]) OR "Diabetes, Type 1"[Title/Abstract]) OR "Autoimmune Diabetes"[Title/Abstract]) OR "Brittle Diabetes Mellitus"[Title/Abstract]) OR "Ketosis-Prone Diabetes Mellitus"[Title/Abstract]) OR "Diabetes Mellitus, Type 1"[Mesh])) OR (((((((((((((((("Diabetes Mellitus, Type 2"[Title/Abstract]) OR "Ketosis-Resistant Diabetes Mellitus"[Title/Abstract]) OR "Non-Insulin-Dependent Diabetes Mellitus"[Title/Abstract]) OR "Stable Diabetes Mellitus"[Title/Abstract]) OR "NIDDM"[Title/Abstract]) OR "Maturity-Onset Diabetes Mellitus"[Title/Abstract]) OR "Maturity Onset Diabetes Mellitus"[Title/Abstract]) OR "MODY"[Title/Abstract]) OR "Type 2 Diabetes Mellitus"[Title/Abstract]) OR "Noninsulin-Dependent Diabetes Mellitus"[Title/Abstract]) OR "Noninsulin Dependent Diabetes Mellitus"[Title/Abstract]) OR "Maturity-Onset Diabetes"[Title/Abstract]) OR "Maturity Onset Diabetes"[Title/Abstract]) OR "Type 2 Diabetes"[Title/Abstract]) OR "Adult-Onset Diabetes Mellitus"[Title/Abstract]) OR "Diabetes Mellitus, Type 2"[Mesh])) OR ((("Diabetes Mellitus"[Mesh]) OR "Diabetes Mellitus"[Title/Abstract]))) OR (((("Gestational Diabetes Mellitus"[Title/Abstract]) OR "Diabetes Mellitus, Gestational"[Title/Abstract]) OR

"Gestational Diabetes"[Title/Abstract]) OR "Pregnancy-Induced Diabetes"[Title/Abstract]) OR "Diabetes, Gestational"[Mesh])) 523490

#3 (((("Observational Studies as Topic"[Mesh]) OR "Observational Study"[Publication Type])) OR (((((((((((((((((((("Case-Control Studies"[Mesh]) OR "Case-Control Studies"[Title/Abstract]) OR "Case-Control Study"[Title/Abstract]) OR "Case-Comparison Studies"[Title/Abstract]) OR "Case Comparison Studies"[Title/Abstract]) OR "Case-Comparison Study"[Title/Abstract]) OR "Case-Compeer Studies"[Title/Abstract]) OR "Case-Referent Studies"[Title/Abstract]) OR "Case Referent Studies"[Title/Abstract]) OR "Case-Referent Study"[Title/Abstract]) OR "Case-Base Studies"[Title/Abstract]) OR "Case Base Studies"[Title/Abstract]) OR "Case Control Studies"[Title/Abstract]) OR "Case Control Study"[Title/Abstract]) OR "Nested Case-Control Studies"[Title/Abstract]) OR "Case-Control Studies, Nested"[Title/Abstract]) OR "Nested Case Control Studies"[Title/Abstract]) OR "Nested Case-Control Study"[Title/Abstract]) OR "Matched Case-Control Studies"[Title/Abstract]) OR "Matched Case Control Studies"[Title/Abstract]) OR "Matched Case-Control Study"[Title/Abstract])) OR (((((((((((((((("Cohort Studies"[Mesh]) OR "Cohort Studies"[Title/Abstract]) OR "Cohort Study"[Title/Abstract]) OR "Concurrent Studies"[Title/Abstract]) OR "Concurrent Study"[Title/Abstract]) OR "Closed Cohort Studies"[Title/Abstract]) OR "Closed Cohort Study"[Title/Abstract]) OR "Cohort Analysis"[Title/Abstract]) OR "Cohort Analyses"[Title/Abstract]) OR "Historical Cohort Studies"[Title/Abstract]) OR "Historical Cohort Study"[Title/Abstract]) OR "Incidence Studies"[Title/Abstract]) OR "Incidence Study"[Title/Abstract]) OR "Cohort\*"[Title/Abstract])))) 2451208

#4 #1 and #2 and #3 105 (search results)

**Cochrane library:**

## ID Search

#1 (Ovarian Neoplasms):ti,ab,kw OR (Neoplasm, Ovarian):ti,ab,kw OR (Ovarian Neoplasm):ti,ab,kw OR (Ovary Neoplasms):ti,ab,kw OR (Neoplasm, Ovary):ti,ab,kw (Word variations have been searched)

#2 (Neoplasms, Ovary):ti,ab,kw OR (Ovary Neoplasm):ti,ab,kw OR (Neoplasms, Ovarian):ti,ab,kw OR (Ovary Cancer):ti,ab,kw OR (Cancer, Ovary):ti,ab,kw (Word variations have been searched)

#3 (Cancers, Ovary):ti,ab,kw OR (Ovary Cancers):ti,ab,kw OR (Ovarian Cancer):ti,ab,kw OR (Cancer, Ovarian):ti,ab,kw OR (Cancers, Ovarian):ti,ab,kw (Word variations have been searched)

#4 (Ovarian Cancers):ti,ab,kw OR (Cancer of Ovary):ti,ab,kw OR (Cancer of the Ovary):ti,ab,kw OR (Carcinoma, Ovarian Epithelial):ti,ab,kw OR (Carcinomas, Ovarian Epithelial):ti,ab,kw (Word variations have been searched)

#5 (Epithelial Carcinoma, Ovarian):ti,ab,kw OR (Epithelial Carcinomas, Ovarian):ti,ab,kw OR (Ovarian Epithelial Carcinomas):ti,ab,kw OR (Epithelial Ovarian Cancer):ti,ab,kw OR (Ovarian Epithelial Cancer):ti,ab,kw (Word variations have been searched)

#6 (Cancer, Ovarian Epithelial):ti,ab,kw OR (Cancers, Ovarian Epithelial):ti,ab,kw OR (Epithelial Cancer, Ovarian):ti,ab,kw OR (Epithelial Cancers, Ovarian):ti,ab,kw OR (Ovarian Epithelial Cancers):ti,ab,kw (Word variations have been searched)

#7 (Ovarian Cancer, Epithelial):ti,ab,kw OR (Cancer, Epithelial Ovarian):ti,ab,kw OR (Cancers, Epithelial Ovarian):ti,ab,kw OR (Epithelial Ovarian Cancers):ti,ab,kw OR (Ovarian Cancers, Epithelial):ti,ab,kw (Word variations have been searched)

#8 (Ovarian Epithelial Carcinoma):ti,ab,kw OR (Epithelial Ovarian Carcinoma):ti,ab,kw OR (Carcinoma, Epithelial Ovarian):ti,ab,kw OR (Carcinomas, Epithelial Ovarian):ti,ab,kw OR (Epithelial Ovarian Carcinomas):ti,ab,kw (Word variations have been searched)

#9 (Ovarian Carcinoma, Epithelial):ti,ab,kw OR (Ovarian Carcinomas, Epithelial):ti,ab,kw OR (ovarian carcinoma):ti,ab,kw OR (Ovar\*):ti,ab,kw (Word variations have been searched)

#10 MeSH descriptor: [Ovarian Neoplasms] explode all trees

#11 MeSH descriptor: [Carcinoma, Ovarian Epithelial] explode all trees

#12 #1 or #2 or #3 or #4 or #5 or #6 or #7 or #8 or #9 or #10 or #11 17934

#13 (Diabetes mellitus):ti,ab,kw OR (Diabetes Mellitus, Type 2):ti,ab,kw OR (Diabetes Mellitus, Noninsulin-Dependent):ti,ab,kw OR (Diabetes Mellitus, Ketosis-Resistant):ti,ab,kw OR (Diabetes Mellitus, Ketosis Resistant):ti,ab,kw (Word variations have been searched)

#14 (Ketosis-Resistant Diabetes Mellitus):ti,ab,kw OR (Diabetes Mellitus, Non Insulin Dependent):ti,ab,kw OR (Diabetes Mellitus, Non-Insulin-Dependent):ti,ab,kw OR (Non-Insulin-Dependent Diabetes Mellitus):ti,ab,kw OR (Diabetes Mellitus, Stable):ti,ab,kw (Word variations have been searched)

#15 (Stable Diabetes Mellitus):ti,ab,kw OR (Diabetes Mellitus, Type II):ti,ab,kw OR

- (NIDDM):ti,ab,kw OR (Diabetes Mellitus, Noninsulin Dependent):ti,ab,kw OR (Diabetes Mellitus, Maturity-Onset):ti,ab,kw (Word variations have been searched)
- #16 (Diabetes Mellitus, Maturity Onset):ti,ab,kw OR (Maturity-Onset Diabetes Mellitus):ti,ab,kw OR (Maturity Onset Diabetes Mellitus):ti,ab,kw OR (MODY):ti,ab,kw OR (Diabetes Mellitus, Slow-Onset):ti,ab,kw (Word variations have been searched)
- #17 (Diabetes Mellitus, Slow Onset):ti,ab,kw OR (Slow-Onset Diabetes Mellitus):ti,ab,kw OR (Type 2 Diabetes Mellitus):ti,ab,kw OR (Noninsulin-Dependent Diabetes Mellitus):ti,ab,kw OR (Noninsulin Dependent Diabetes Mellitus):ti,ab,kw (Word variations have been searched)
- #18 (Maturity-Onset Diabetes):ti,ab,kw OR (Diabetes, Maturity-Onset):ti,ab,kw OR (Maturity Onset Diabetes):ti,ab,kw OR (Type 2 Diabetes):ti,ab,kw OR (Diabetes, Type 2):ti,ab,kw (Word variations have been searched)
- #19 (Diabetes Mellitus, Adult-Onset):ti,ab,kw OR (Adult-Onset Diabetes Mellitus):ti,ab,kw OR (Diabetes Mellitus, Adult Onset):ti,ab,kw OR (Diabetes Mellitus, Type 1):ti,ab,kw OR (Diabetes Mellitus, Insulin-Dependent):ti,ab,kw (Word variations have been searched)
- #20 (Diabetes Mellitus, Insulin Dependent):ti,ab,kw OR (Insulin-Dependent Diabetes Mellitus):ti,ab,kw OR (Diabetes Mellitus, Juvenile-Onset):ti,ab,kw OR (Diabetes Mellitus, Juvenile Onset):ti,ab,kw OR (Juvenile-Onset Diabetes Mellitus):ti,ab,kw (Word variations have been searched)
- #21 (IDDM):ti,ab,kw OR (Juvenile-Onset Diabetes):ti,ab,kw OR (Diabetes, Juvenile-Onset):ti,ab,kw OR (Juvenile Onset Diabetes):ti,ab,kw OR (Diabetes Mellitus, Sudden-Onset):ti,ab,kw (Word variations have been searched)
- #22 (Diabetes Mellitus, Sudden Onset):ti,ab,kw OR (Sudden-Onset Diabetes Mellitus):ti,ab,kw OR (Type 1 Diabetes Mellitus):ti,ab,kw OR (Diabetes Mellitus, Insulin-Dependent, 1):ti,ab,kw OR (Insulin-Dependent Diabetes Mellitus 1):ti,ab,kw (Word variations have been searched)
- #23 (Insulin Dependent Diabetes Mellitus 1):ti,ab,kw OR (Type 1 Diabetes):ti,ab,kw OR (Diabetes, Type 1):ti,ab,kw OR (Diabetes Mellitus, Type I):ti,ab,kw OR (Diabetes, Autoimmune):ti,ab,kw (Word variations have been searched)
- #24 (Autoimmune Diabetes):ti,ab,kw OR (Diabetes Mellitus, Brittle):ti,ab,kw OR (Brittle Diabetes Mellitus):ti,ab,kw OR (Diabetes Mellitus, Ketosis-Prone):ti,ab,kw OR (Diabetes Mellitus, Ketosis Prone):ti,ab,kw (Word variations have been searched)
- #25 (Ketosis-Prone Diabetes Mellitus):ti,ab,kw OR (Diabetes, Gestational):ti,ab,kw OR (Diabetes, Pregnancy-Induced):ti,ab,kw OR (Diabetes, Pregnancy Induced):ti,ab,kw OR (Pregnancy-Induced Diabetes):ti,ab,kw (Word variations have been searched)
- #26 (Gestational Diabetes):ti,ab,kw OR (Diabetes Mellitus, Gestational):ti,ab,kw OR (Gestational Diabetes Mellitus):ti,ab,kw OR (diabete):ti,ab,kw OR (diabet\*):ti,ab,kw (Word variations have been searched)
- #27 MeSH descriptor: [Diabetes Mellitus] explode all trees
- #28 MeSH descriptor: [Diabetes Mellitus, Type 2] explode all trees
- #29 MeSH descriptor: [Diabetes Mellitus, Type 1] explode all trees

#30 MeSH descriptor: [Diabetes, Gestational] explode all trees

#31 #13 or #14 or #15 or #16 or #17 or #18 or #19 or #20 or #21 or #22 or #23 or #24 or #25 or #26 or #27 or #28 or #29 or #30 **89079**

#32 (Cohort Studies):ti,ab,kw OR (Cohort Study):ti,ab,kw OR (Studies, Cohort):ti,ab,kw OR (Study, Cohort):ti,ab,kw OR (Concurrent Studies):ti,ab,kw (Word variations have been searched)

#33 (Studies, Concurrent):ti,ab,kw OR (Concurrent Study):ti,ab,kw OR (Study, Concurrent):ti,ab,kw OR (Closed Cohort Studies):ti,ab,kw OR (Cohort Studies, Closed):ti,ab,kw (Word variations have been searched)

#34 (Closed Cohort Study):ti,ab,kw OR (Cohort Study, Closed):ti,ab,kw OR (Study, Closed Cohort):ti,ab,kw OR (Studies, Closed Cohort):ti,ab,kw OR (Analysis, Cohort):ti,ab,kw (Word variations have been searched)

#35 (Cohort Analysis):ti,ab,kw OR (Analyses, Cohort):ti,ab,kw OR (Cohort Analyses):ti,ab,kw OR (Historical Cohort Studies):ti,ab,kw OR (Cohort Study, Historical):ti,ab,kw (Word variations have been searched)

#36 (Historical Cohort Study):ti,ab,kw OR (Study, Historical Cohort):ti,ab,kw OR (Cohort Studies, Historical):ti,ab,kw OR (Studies, Historical Cohort):ti,ab,kw OR (Incidence Studies):ti,ab,kw (Word variations have been searched)

#37 (Incidence Study):ti,ab,kw OR (Studies, Incidence):ti,ab,kw OR (Study, Incidence):ti,ab,kw AND (Cohort\*):ti,ab,kw (Word variations have been searched)

#38 MeSH descriptor: [Cohort Studies] explode all trees

#39 #32 or #33 or #34 or #35 or #36 or #37 or #38

#40 (Case-Control Studies):ti,ab,kw OR (Case-Control Study):ti,ab,kw OR (Studies, Case-Control):ti,ab,kw OR (Study, Case-Control):ti,ab,kw OR (Case-Comparison Studies):ti,ab,kw (Word variations have been searched)

#41 (Case Comparison Studies):ti,ab,kw OR (Case-Comparison Study):ti,ab,kw OR (Studies, Case-Comparison):ti,ab,kw OR (Study, Case-Comparison):ti,ab,kw OR (Case-Compeer Studies):ti,ab,kw (Word variations have been searched)

#42 (Studies, Case-Compeer):ti,ab,kw OR (Case-Referrent Studies):ti,ab,kw OR (Case Referrent Studies):ti,ab,kw OR (Case-Referrent Study):ti,ab,kw OR (Studies, Case-Referrent):ti,ab,kw (Word variations have been searched)

#43 (Study, Case-Referrent):ti,ab,kw OR (Case-Referent Studies):ti,ab,kw OR (Case Referent Studies):ti,ab,kw OR (Case-Referent Study):ti,ab,kw OR (Studies, Case-Referent):ti,ab,kw (Word variations have been searched)

#44 (Study, Case-Referent):ti,ab,kw OR (Case-Base Studies):ti,ab,kw OR (Case Base Studies):ti,ab,kw OR (Studies, Case-Base):ti,ab,kw OR (Case Control Studies):ti,ab,kw (Word variations have been searched)

#45 (Case Control Study):ti,ab,kw OR (Studies, Case Control):ti,ab,kw OR (Study, Case Control):ti,ab,kw OR (Nested Case-Control Studies):ti,ab,kw OR (Case-Control Studies, Nested):ti,ab,kw (Word variations have been searched)

#46 (Case-Control Study, Nested):ti,ab,kw OR (Nested Case Control Studies):ti,ab,kw OR (Nested Case-Control Study):ti,ab,kw OR (Studies, Nested Case-Control):ti,ab,kw OR (Study, Nested Case-Control):ti,ab,kw (Word variations have been searched)

#47 (Matched Case-Control Studies):ti,ab,kw OR (Case-Control Studies, Matched):ti,ab,kw OR (Case-Control Study, Matched):ti,ab,kw OR (Matched Case Control Studies):ti,ab,kw OR (Matched Case-Control Study):ti,ab,kw (Word variations have been searched)

#48 (Study, Matched Case-Control):ti,ab,kw OR (Studies, Matched Case-Control):ti,ab,kw OR (Case-Control):ti,ab,kw OR (Case Control):ti,ab,kw (Word variations have been searched)

#49 MeSH descriptor: [Case-Control Studies] explode all trees

#50 #40 or #41 or #42 or #43 or #44 or #45 or #46 or #47 or #48 or #49 104520

#51 MeSH descriptor: [Observational Study] explode all trees

#52 (Observational Study):ti,ab,kw OR (observation\*):ti,ab,kw (Word variations have been searched)

#53 #51 or #52 224361

#54 #39 or #50 or #53 487408

#55 #12 and #31 and #54 **165** (search results)

**Embase Session Results (9 Apr 2020) (search results: 273)**

| No.   | Query Results                                                                                                                                                                                                                                                                                                                                                                                                                                                                                                                                                                                                | Results   | Date       |
|-------|--------------------------------------------------------------------------------------------------------------------------------------------------------------------------------------------------------------------------------------------------------------------------------------------------------------------------------------------------------------------------------------------------------------------------------------------------------------------------------------------------------------------------------------------------------------------------------------------------------------|-----------|------------|
| #196. | #48 AND #120 AND #195                                                                                                                                                                                                                                                                                                                                                                                                                                                                                                                                                                                        | 273       | 9 Apr 2020 |
| #195. | #121 OR #122 OR #123 OR #124 OR #125 OR #126 OR #127 OR #128 OR #129 OR #130 OR #131 OR #132 OR #133 OR #134 OR #135 OR #136 OR #137 OR #138 OR #139 OR #140 OR #141 OR #142 OR #143 OR #144 OR #145 OR #146 OR #147 OR #148 OR #149 OR #150 OR #151 OR #152 OR #153 OR #154 OR #155 OR #156 OR #157 OR #158 OR #159 OR #160 OR #161 OR #162 OR #163 OR #164 OR #165 OR #166 OR #167 OR #168 OR #169 OR #170 OR #171 OR #172 OR #173 OR #174 OR #175 OR #176 OR #177 OR #178 OR #179 OR #180 OR #181 OR #182 OR #183 OR #184 OR #185 OR #186 OR #187 OR #188 OR #189 OR #190 OR #191 OR #192 OR #193 OR #194 | 1,012,386 | 9 Apr 2020 |
| #194. | 'cohort analysis'/exp                                                                                                                                                                                                                                                                                                                                                                                                                                                                                                                                                                                        | 563,360   | 9 Apr 2020 |
| #193. | 'case control study'/exp                                                                                                                                                                                                                                                                                                                                                                                                                                                                                                                                                                                     | 170,234   | 9 Apr 2020 |
| #192. | 'observational study'/exp                                                                                                                                                                                                                                                                                                                                                                                                                                                                                                                                                                                    | 192,953   | 9 Apr 2020 |
| #191. | 'observational study':ab,ti                                                                                                                                                                                                                                                                                                                                                                                                                                                                                                                                                                                  | 124,700   | 9 Apr 2020 |
| #190. | 'study, matched case-control':ab,ti                                                                                                                                                                                                                                                                                                                                                                                                                                                                                                                                                                          | 6         | 9 Apr 2020 |
| #189. | 'studies, matched case-control':ab,ti                                                                                                                                                                                                                                                                                                                                                                                                                                                                                                                                                                        | 2         | 9 Apr 2020 |
| #188. | 'matched case-control study':ab,ti                                                                                                                                                                                                                                                                                                                                                                                                                                                                                                                                                                           | 4,504     | 9 Apr 2020 |
| #187. | 'matched case control studies':ab,ti                                                                                                                                                                                                                                                                                                                                                                                                                                                                                                                                                                         | 242       | 9 Apr 2020 |
| #186. | 'case-control study, matched':ab,ti                                                                                                                                                                                                                                                                                                                                                                                                                                                                                                                                                                          | 115       | 9 Apr 2020 |
| #185. | 'case-control studies, matched':ab,ti                                                                                                                                                                                                                                                                                                                                                                                                                                                                                                                                                                        | 7         | 9 Apr 2020 |
| #184. | 'matched case-control studies':ab,ti                                                                                                                                                                                                                                                                                                                                                                                                                                                                                                                                                                         | 242       | 9 Apr 2020 |
| #183. | 'study, nested case-control':ab,ti                                                                                                                                                                                                                                                                                                                                                                                                                                                                                                                                                                           | 13        | 9 Apr 2020 |
| #182. | 'studies, nested case-control':ab,ti                                                                                                                                                                                                                                                                                                                                                                                                                                                                                                                                                                         | 15        | 9 Apr 2020 |
| #181. | 'nested case-control study':ab,ti                                                                                                                                                                                                                                                                                                                                                                                                                                                                                                                                                                            | 8,227     | 9 Apr 2020 |
| #180. | 'nested case control studies':ab,ti                                                                                                                                                                                                                                                                                                                                                                                                                                                                                                                                                                          | 668       | 9 Apr 2020 |
| #179. | 'case-control study, nested':ab,ti                                                                                                                                                                                                                                                                                                                                                                                                                                                                                                                                                                           | 1,239     | 9 Apr 2020 |
| #178. | 'case-control studies, nested':ab,ti                                                                                                                                                                                                                                                                                                                                                                                                                                                                                                                                                                         | 80        | 9 Apr 2020 |
| #177. | 'nested case-control studies':ab,ti                                                                                                                                                                                                                                                                                                                                                                                                                                                                                                                                                                          | 668       | 9 Apr 2020 |
| #176. | 'study, case control':ab,ti                                                                                                                                                                                                                                                                                                                                                                                                                                                                                                                                                                                  | 212       | 9 Apr 2020 |
| #175. | 'studies, case control':ab,ti                                                                                                                                                                                                                                                                                                                                                                                                                                                                                                                                                                                | 513       | 9 Apr 2020 |
| #174. | 'case control study':ab,ti                                                                                                                                                                                                                                                                                                                                                                                                                                                                                                                                                                                   | 107,936   | 9 Apr 2020 |
| #173. | 'case control studies':ab,ti                                                                                                                                                                                                                                                                                                                                                                                                                                                                                                                                                                                 | 19,908    | 9 Apr 2020 |
| #172. | 'studies, case-base':ab,ti                                                                                                                                                                                                                                                                                                                                                                                                                                                                                                                                                                                   | 1         | 9 Apr 2020 |
| #171. | 'case base studies':ab,ti                                                                                                                                                                                                                                                                                                                                                                                                                                                                                                                                                                                    | 8         | 9 Apr 2020 |
| #170. | 'case-base studies':ab,ti                                                                                                                                                                                                                                                                                                                                                                                                                                                                                                                                                                                    | 8         | 9 Apr 2020 |
| #169. | 'study, case-referent':ab,ti                                                                                                                                                                                                                                                                                                                                                                                                                                                                                                                                                                                 | 1         | 9 Apr 2020 |

|                                         |         |            |
|-----------------------------------------|---------|------------|
| #168.'studies, case-referent':ab,ti     | 1       | 9 Apr 2020 |
| #167.'case-referent study':ab,ti        | 523     | 9 Apr 2020 |
| #166.'case referent studies':ab,ti      | 84      | 9 Apr 2020 |
| #165.'case-referent studies':ab,ti      | 84      | 9 Apr 2020 |
| #164.'study, case-referent':ab,ti       | 9       | Apr 2020   |
| #163.'studies, case-referent':ab,ti     | 9       | Apr 2020   |
| #162.'case-referent study':ab,ti        | 1       | 9 Apr 2020 |
| #161.'case referent studies':ab,ti      | 9       | Apr 2020   |
| #160.'case-referent studies':ab,ti      | 9       | Apr 2020   |
| #159.'studies, case-compeer':ab,ti      | 1       | 9 Apr 2020 |
| #158.'case-compeer studies':ab,ti       | 1       | 9 Apr 2020 |
| #157.'study, case-comparison':ab,ti     | 9       | Apr 2020   |
| #156.'studies, case-comparison':ab,ti   | 9       | Apr 2020   |
| #155.'case-comparison study':ab,ti      | 215     | 9 Apr 2020 |
| #154.'case comparison studies':ab,ti    | 9       | 9 Apr 2020 |
| #153.'case-comparison studies':ab,ti    | 9       | 9 Apr 2020 |
| #152.'study, case-control':ab,ti        | 212     | 9 Apr 2020 |
| #151.'studies, case-control':ab,ti      | 513     | 9 Apr 2020 |
| #150.'case-control study':ab,ti         | 107,936 | 9 Apr 2020 |
| #149.'case-control studies':ab,ti       | 19,908  | 9 Apr 2020 |
| #148.'study, incidence':ab,ti           | 662     | 9 Apr 2020 |
| #147.'studies, incidence':ab,ti         | 140     | 9 Apr 2020 |
| #146.'incidence study':ab,ti            | 1,373   | 9 Apr 2020 |
| #145.'incidence studies':ab,ti          | 750     | 9 Apr 2020 |
| #144.'studies, historical cohort':ab,ti | 2       | 9 Apr 2020 |
| #143.'cohort studies, historical':ab,ti | 9       | Apr 2020   |
| #142.'study, historical cohort':ab,ti   | 20      | 9 Apr 2020 |
| #141.'historical cohort study':ab,ti    | 2,683   | 9 Apr 2020 |
| #140.'cohort study, historical':ab,ti   | 5       | 9 Apr 2020 |
| #139.'historical cohort studies':ab,ti  | 70      | 9 Apr 2020 |
| #138.'cohort analyses':ab,ti            | 809     | 9 Apr 2020 |
| #137.'analyses, cohort':ab,ti           | 30      | 9 Apr 2020 |
| #136.'cohort analysis':ab,ti            | 11,330  | 9 Apr 2020 |
| #135.'analysis, cohort':ab,ti           | 473     | 9 Apr 2020 |
| #134.'studies, closed cohort':ab,ti     | 9       | Apr 2020   |
| #133.'study, closed cohort':ab,ti       | 1       | 9 Apr 2020 |
| #132.'cohort study, closed':ab,ti       | 9       | Apr 2020   |
| #131.'closed cohort study':ab,ti        | 41      | 9 Apr 2020 |
| #130.'cohort studies, closed':ab,ti     | 9       | Apr 2020   |
| #129.'closed cohort studies':ab,ti      | 2       | 9 Apr 2020 |
| #128.'study, concurrent':ab,ti          | 148     | 9 Apr 2020 |
| #127.'concurrent study':ab,ti           | 239     | 9 Apr 2020 |
| #126.'studies, concurrent':ab,ti        | 46      | 9 Apr 2020 |
| #125.'concurrent studies':ab,ti         | 198     | 9 Apr 2020 |



|                                                                                                                                                                                                                                                                                                                                                                                                                                                                                                             |           |            |
|-------------------------------------------------------------------------------------------------------------------------------------------------------------------------------------------------------------------------------------------------------------------------------------------------------------------------------------------------------------------------------------------------------------------------------------------------------------------------------------------------------------|-----------|------------|
| #124.'study, cohort':ab,ti                                                                                                                                                                                                                                                                                                                                                                                                                                                                                  | 21,934    | 9 Apr 2020 |
| #123.'studies, cohort':ab,ti                                                                                                                                                                                                                                                                                                                                                                                                                                                                                | 490       | 9 Apr 2020 |
| #122.'cohort study':ab,ti                                                                                                                                                                                                                                                                                                                                                                                                                                                                                   | 260,094   | 9 Apr 2020 |
| #121.'cohort studies':ab,ti                                                                                                                                                                                                                                                                                                                                                                                                                                                                                 | 31,752    | 9 Apr 2020 |
| #120.#49 OR #50 OR #51 OR #52 OR #53 OR #54 OR #55 OR<br>Apr 2020                                                                                                                                                                                                                                                                                                                                                                                                                                           | 1,047,969 | 9          |
| #56 OR #57 OR #58 OR #59 OR #60 OR #61 OR #62 OR<br>#63 OR #64 OR #65 OR #66 OR #67 OR #68 OR #69 OR<br>#70 OR #71 OR #72 OR #73 OR #74 OR #75 OR #76 OR<br>#77 OR #78 OR #79 OR #80 OR #81 OR #82 OR #83 OR<br>#84 OR #85 OR #86 OR #87 OR #88 OR #89 OR #90 OR<br>#91 OR #92 OR #93 OR #94 OR #95 OR #96 OR #97 OR<br>#98 OR #99 OR #100 OR #101 OR #102 OR #103 OR<br>#104 OR #105 OR #106 OR #107 OR #108 OR #109 OR<br>#110 OR #111 OR #112 OR #113 OR #114 OR #115 OR<br>#116 OR #117 OR #118 OR #119 |           |            |
| #119.'pregnancy diabetes mellitus'/exp                                                                                                                                                                                                                                                                                                                                                                                                                                                                      | 36,590    | 9 Apr 2020 |
| #118.'non insulin dependent diabetes mellitus'/exp                                                                                                                                                                                                                                                                                                                                                                                                                                                          | 253,232   | 9 Apr 2020 |
| #117.'insulin dependent diabetes mellitus'/exp                                                                                                                                                                                                                                                                                                                                                                                                                                                              | 117,492   | 9 Apr 2020 |
| #116.'diabetes mellitus'/exp                                                                                                                                                                                                                                                                                                                                                                                                                                                                                | 1,001,964 | 9 Apr 2020 |
| #115.'gestational diabetes mellitus':ab,ti                                                                                                                                                                                                                                                                                                                                                                                                                                                                  | 11,376    | 9 Apr 2020 |
| #114.'diabetes mellitus, gestational':ab,ti                                                                                                                                                                                                                                                                                                                                                                                                                                                                 | 91        | 9 Apr 2020 |
| #113.'gestational diabetes':ab,ti                                                                                                                                                                                                                                                                                                                                                                                                                                                                           | 22,863    | 9 Apr 2020 |
| #112.'pregnancy-induced diabetes':ab,ti                                                                                                                                                                                                                                                                                                                                                                                                                                                                     | 14        | 9 Apr 2020 |
| #111.'diabetes, pregnancy induced':ab,ti                                                                                                                                                                                                                                                                                                                                                                                                                                                                    | 57        | 9 Apr 2020 |
| #110.'diabetes, pregnancy-induced':ab,ti                                                                                                                                                                                                                                                                                                                                                                                                                                                                    | 57        | 9 Apr 2020 |
| #109.'diabetes, gestational':ab,ti                                                                                                                                                                                                                                                                                                                                                                                                                                                                          | 313       | 9 Apr 2020 |
| #108.'ketosis-prone diabetes mellitus':ab,ti                                                                                                                                                                                                                                                                                                                                                                                                                                                                | 16        | 9 Apr 2020 |
| #107.'diabetes mellitus, ketosis prone':ab,ti                                                                                                                                                                                                                                                                                                                                                                                                                                                               | 9         | Apr 2020   |
| #106.'diabetes mellitus, ketosis-prone':ab,ti                                                                                                                                                                                                                                                                                                                                                                                                                                                               | 9         | Apr 2020   |
| #105.'brittle diabetes mellitus':ab,ti                                                                                                                                                                                                                                                                                                                                                                                                                                                                      | 26        | 9 Apr 2020 |
| #104.'diabetes mellitus, brittle':ab,ti                                                                                                                                                                                                                                                                                                                                                                                                                                                                     | 3         | 9 Apr 2020 |
| #103.'autoimmune diabetes':ab,ti                                                                                                                                                                                                                                                                                                                                                                                                                                                                            | 4,106     | 9 Apr 2020 |
| #102.'diabetes, autoimmune':ab,ti                                                                                                                                                                                                                                                                                                                                                                                                                                                                           | 213       | 9 Apr 2020 |
| #101.'diabetes, type 1':ab,ti                                                                                                                                                                                                                                                                                                                                                                                                                                                                               | 1,452     | 9 Apr 2020 |
| #100.'type 1 diabetes':ab,ti                                                                                                                                                                                                                                                                                                                                                                                                                                                                                | 60,696    | 9 Apr 2020 |
| #99.'insulin dependent diabetes mellitus 1':ab,ti                                                                                                                                                                                                                                                                                                                                                                                                                                                           | 31        | 9 Apr 2020 |
| #98.'insulin-dependent diabetes mellitus 1':ab,ti                                                                                                                                                                                                                                                                                                                                                                                                                                                           | 31        | 9 Apr 2020 |
| #97.'diabetes mellitus, insulin-dependent, 1':ab,ti                                                                                                                                                                                                                                                                                                                                                                                                                                                         | 9         | Apr 2020   |
| #96.'type 1 diabetes mellitus':ab,ti                                                                                                                                                                                                                                                                                                                                                                                                                                                                        | 14,962    | 9 Apr 2020 |
| #95.'sudden-onset diabetes mellitus':ab,ti                                                                                                                                                                                                                                                                                                                                                                                                                                                                  | 1         | 9 Apr 2020 |
| #94.'diabetes mellitus, sudden onset':ab,ti                                                                                                                                                                                                                                                                                                                                                                                                                                                                 | 1         | 9 Apr 2020 |
| #93.'diabetes mellitus, sudden-onset':ab,ti                                                                                                                                                                                                                                                                                                                                                                                                                                                                 | 1         | 9 Apr 2020 |
| #92.'juvenile onset diabetes':ab,ti                                                                                                                                                                                                                                                                                                                                                                                                                                                                         | 494       | 9 Apr 2020 |

|                                                       |         |            |
|-------------------------------------------------------|---------|------------|
| #91. 'diabetes, juvenile-onset':ab,ti                 | 4       | 9 Apr 2020 |
| #90. 'juvenile-onset diabetes':ab,ti                  | 494     | 9 Apr 2020 |
| #89. 'iddm':ab,ti                                     | 7,833   | 9 Apr 2020 |
| #88. 'juvenile-onset diabetes mellitus':ab,ti         | 232     | 9 Apr 2020 |
| #87. 'diabetes mellitus, juvenile onset':ab,ti        | 3       | 9 Apr 2020 |
| #86. 'diabetes mellitus, juvenile-onset':ab,ti        | 3       | 9 Apr 2020 |
| #85. 'insulin-dependent diabetes mellitus':ab,ti      | 17,759  | 9 Apr 2020 |
| #84. 'diabetes mellitus, insulin dependent':ab,ti     | 47      | 9 Apr 2020 |
| #83. 'diabetes mellitus, insulin-dependent':ab,ti     | 47      | 9 Apr 2020 |
| #82. 'diabetes mellitus, type 1':ab,ti                | 1,786   | 9 Apr 2020 |
| #81. 'diabetes mellitus, adult onset':ab,ti           | 3       | 9 Apr 2020 |
| #80. 'adult-onset diabetes mellitus':ab,ti            | 193     | 9 Apr 2020 |
| #79. 'diabetes mellitus, adult-onset':ab,ti           | 3       | 9 Apr 2020 |
| #78. 'diabetes, type 2':ab,ti                         | 2,279   | 9 Apr 2020 |
| #77. 'type 2 diabetes':ab,ti                          | 185,187 | 9 Apr 2020 |
| #76. 'maturity onset diabetes':ab,ti                  | 2,618   | 9 Apr 2020 |
| #75. 'diabetes, maturity-onset':ab,ti                 | 43      | 9 Apr 2020 |
| #74. 'maturity-onset diabetes':ab,ti                  | 2,618   | 9 Apr 2020 |
| #73. 'noninsulin dependent diabetes mellitus':ab,ti   | 1,037   | 9 Apr 2020 |
| #72. 'noninsulin-dependent diabetes mellitus':ab,ti   | 1,037   | 9 Apr 2020 |
| #71. 'type 2 diabetes mellitus':ab,ti                 | 61,709  | 9 Apr 2020 |
| #70. 'slow-onset diabetes mellitus':ab,ti             |         | 9 Apr 2020 |
| #69. 'diabetes mellitus, slow onset':ab,ti            | 1       | 9 Apr 2020 |
| #68. 'diabetes mellitus, slow-onset':ab,ti            | 1       | 9 Apr 2020 |
| #67. 'mody':ab,ti                                     | 2,136   | 9 Apr 2020 |
| #66. 'maturity onset diabetes mellitus':ab,ti         | 183     | 9 Apr 2020 |
| #65. 'maturity-onset diabetes mellitus':ab,ti         | 183     | 9 Apr 2020 |
| #64. 'diabetes mellitus, maturity onset':ab,ti        | 14      | 9 Apr 2020 |
| #63. 'diabetes mellitus, maturity-onset':ab,ti        | 14      | 9 Apr 2020 |
| #62. 'diabetes mellitus, noninsulin dependent':ab,ti  | 4       | 9 Apr 2020 |
| #61. 'niddm':ab,ti                                    | 7,991   | 9 Apr 2020 |
| #60. 'diabetes mellitus, type ii':ab,ti               | 1,081   | 9 Apr 2020 |
| #59. 'stable diabetes mellitus':ab,ti                 | 28      | 9 Apr 2020 |
| #58. 'diabetes mellitus, stable':ab,ti                | 16      | 9 Apr 2020 |
| #57. 'non-insulin-dependent diabetes mellitus':ab,ti  | 7,743   | 9 Apr 2020 |
| #56. 'diabetes mellitus, non-insulin-dependent':ab,ti | 40      | 9 Apr 2020 |
| #55. 'diabetes mellitus, non insulin dependent':ab,ti | 40      | 9 Apr 2020 |
| #54. 'ketosis-resistant diabetes mellitus':ab,ti      | 2       | 9 Apr 2020 |
| #53. 'diabetes mellitus, ketosis resistant':ab,ti     |         | 9 Apr 2020 |
| #52. 'diabetes mellitus, ketosis-resistant':ab,ti     |         | 9 Apr 2020 |
| #51. 'diabetes mellitus, noninsulin-dependent':ab,ti  | 4       | 9 Apr 2020 |
| #50. 'diabetes mellitus, type 2':ab,ti                | 4,600   | 9 Apr 2020 |
| #49. 'diabetes mellitus':ab,ti                        | 278,869 | 9 Apr 2020 |
| #48. #1 OR #2 OR #3 OR #4 OR #5 OR #6 OR #7 OR #8 OR  | 161,803 | 9 Apr 2020 |

|                                                                                                                                                                                                                                                                                             |         |            |
|---------------------------------------------------------------------------------------------------------------------------------------------------------------------------------------------------------------------------------------------------------------------------------------------|---------|------------|
| #9 OR #10 OR #11 OR #12 OR #13 OR #14 OR #15 OR<br>#16 OR #17 OR #18 OR #19 OR #20 OR #21 OR #22 OR<br>#23 OR #24 OR #25 OR #26 OR #27 OR #28 OR #29 OR<br>#30 OR #31 OR #32 OR #33 OR #34 OR #35 OR #36 OR<br>#37 OR #38 OR #39 OR #40 OR #41 OR #42 OR #43 OR<br>#44 OR #45 OR #46 OR #47 |         |            |
| #47. 'ovary cancer'/exp                                                                                                                                                                                                                                                                     | 120,100 | 9 Apr 2020 |
| #46. 'ovary tumor'/exp                                                                                                                                                                                                                                                                      | 150,462 | 9 Apr 2020 |
| #45. 'ovary tumor':ab,ti                                                                                                                                                                                                                                                                    | 129     | 9 Apr 2020 |
| #44. 'ovarian tumor':ab,ti                                                                                                                                                                                                                                                                  | 7,638   | 9 Apr 2020 |
| #43. 'ovarian carcinoma':ab,ti                                                                                                                                                                                                                                                              | 17,377  | 9 Apr 2020 |
| #42. 'ovarian carcinomas, epithelial':ab,ti                                                                                                                                                                                                                                                 | 1       | 9 Apr 2020 |
| #41. 'ovarian carcinoma, epithelial':ab,ti                                                                                                                                                                                                                                                  | 6       | 9 Apr 2020 |
| #40. 'epithelial ovarian carcinomas':ab,ti                                                                                                                                                                                                                                                  | 459     | 9 Apr 2020 |
| #39. 'carcinomas, epithelial ovarian':ab,ti                                                                                                                                                                                                                                                 | 2       | 9 Apr 2020 |
| #38. 'carcinoma, epithelial ovarian':ab,ti                                                                                                                                                                                                                                                  | 6       | 9 Apr 2020 |
| #37. 'epithelial ovarian carcinoma':ab,ti                                                                                                                                                                                                                                                   | 2,143   | 9 Apr 2020 |
| #36. 'ovarian epithelial carcinoma':ab,ti                                                                                                                                                                                                                                                   | 290     | 9 Apr 2020 |
| #35. 'ovarian cancers, epithelial':ab,ti                                                                                                                                                                                                                                                    | 1       | 9 Apr 2020 |
| #34. 'epithelial ovarian cancers':ab,ti                                                                                                                                                                                                                                                     | 1,189   | 9 Apr 2020 |
| #33. 'cancers, epithelial ovarian':ab,ti                                                                                                                                                                                                                                                    | 7       | 9 Apr 2020 |
| #32. 'cancer, epithelial ovarian':ab,ti                                                                                                                                                                                                                                                     | 21      | 9 Apr 2020 |
| #31. 'ovarian cancer, epithelial':ab,ti                                                                                                                                                                                                                                                     | 43      | 9 Apr 2020 |
| #30. 'ovarian epithelial cancers':ab,ti                                                                                                                                                                                                                                                     | 100     | 9 Apr 2020 |
| #29. 'epithelial cancers, ovarian':ab,ti                                                                                                                                                                                                                                                    | 1       | 9 Apr 2020 |
| #28. 'epithelial cancer, ovarian':ab,ti                                                                                                                                                                                                                                                     | 4       | 9 Apr 2020 |
| #27. 'cancers, ovarian epithelial':ab,ti                                                                                                                                                                                                                                                    | 9       | Apr 2020   |
| #26. 'cancer, ovarian epithelial':ab,ti                                                                                                                                                                                                                                                     | 3       | 9 Apr 2020 |
| #25. 'ovarian epithelial cancer':ab,ti                                                                                                                                                                                                                                                      | 414     | 9 Apr 2020 |
| #24. 'epithelial ovarian cancer':ab,ti                                                                                                                                                                                                                                                      | 13,087  | 9 Apr 2020 |
| #23. 'ovarian epithelial carcinomas':ab,ti                                                                                                                                                                                                                                                  | 84      | 9 Apr 2020 |
| #22. 'epithelial carcinomas, ovarian':ab,ti                                                                                                                                                                                                                                                 | 9       | Apr 2020   |
| #21. 'epithelial carcinoma, ovarian':ab,ti                                                                                                                                                                                                                                                  | 1       | 9 Apr 2020 |
| #20. 'carcinomas, ovarian epithelial':ab,ti                                                                                                                                                                                                                                                 | 1       | 9 Apr 2020 |
| #19. 'carcinoma, ovarian epithelial':ab,ti                                                                                                                                                                                                                                                  | 2       | 9 Apr 2020 |
| #18. 'cancer of the ovary':ab,ti                                                                                                                                                                                                                                                            | 735     | 9 Apr 2020 |
| #17. 'cancer of ovary':ab,ti                                                                                                                                                                                                                                                                | 32      | 9 Apr 2020 |
| #16. 'ovarian cancers':ab,ti                                                                                                                                                                                                                                                                | 8,913   | 9 Apr 2020 |
| #15. 'cancers, ovarian':ab,ti                                                                                                                                                                                                                                                               | 139     | 9 Apr 2020 |
| #14. 'cancer, ovarian':ab,ti                                                                                                                                                                                                                                                                | 1,121   | 9 Apr 2020 |
| #13. 'ovarian cancer':ab,ti                                                                                                                                                                                                                                                                 | 76,611  | 9 Apr 2020 |
| #12. 'ovary cancers':ab,ti                                                                                                                                                                                                                                                                  | 89      | 9 Apr 2020 |
| #11. 'cancers, ovary':ab,ti                                                                                                                                                                                                                                                                 | 12      | 9 Apr 2020 |
| #10. 'cancer, ovary':ab,ti                                                                                                                                                                                                                                                                  | 65      | 9 Apr 2020 |

|     |                            |       |            |
|-----|----------------------------|-------|------------|
| #9. | 'ovary cancer':ab,ti       | 595   | 9 Apr 2020 |
| #8. | 'neoplasms, ovarian':ab,ti | 23    | 9 Apr 2020 |
| #7. | 'ovary neoplasm':ab,ti     | 7     | 9 Apr 2020 |
| #6. | 'neoplasms, ovary':ab,ti   | 5     | 9 Apr 2020 |
| #5. | 'neoplasm, ovary':ab,ti    | 2     | 9 Apr 2020 |
| #4. | 'ovarian neoplasm':ab,ti   | 760   | 9 Apr 2020 |
| #3. | 'ovary neoplasms':ab,ti    | 14    | 9 Apr 2020 |
| #2. | 'neoplasm, ovarian':ab,ti  | 13    | 9 Apr 2020 |
| #1. | 'ovarian neoplasms':ab,ti  | 1,859 | 9 Apr 2020 |
