# Supplementary material for: Diabetes mellitus and the risk of ovarian cancer: a systematic review and meta-analysis of cohort and case–control studies
Source: PubMed Central journal article supplement — BMJ Open. 2020 Dec 29;10(12):e040137. doi: 10.1136/bmjopen-2020-040137 (PMC7778773; doi:10.1136/bmjopen-2020-040137), 2020-12-29
Supplement: bmjopen-2020-040137supp003.pdf [file bmjopen-2020-040137supp003.pdf]

### Additional file 3 Quality assessment of included studies based on the Newcastle-Ottawa Scale score

#### Cohort studies

| Study ID        | Representativeness of the exposed cohort | Selection of the non-exposed cohort | Ascertainment of exposure | Demonstration that outcome of interest was not present at start of study | Comparability of cohorts on the basis of the design or analysis <sup>∞</sup> | Assessment of outcome | Was follow-up long enough for outcomes to occur | Adequacy of follow-up of cohorts | Total stars |
|-----------------|------------------------------------------|-------------------------------------|---------------------------|--------------------------------------------------------------------------|------------------------------------------------------------------------------|-----------------------|-------------------------------------------------|----------------------------------|-------------|
| Weiderpass 2002 | ★                                        | ★                                   | ★                         | ★                                                                        | ★                                                                            | ★                     | ★                                               | ★                                | 8           |
| Zendehdel 2003  | ★                                        | ★                                   | ★                         | ★                                                                        | ★                                                                            | ★                     | ★                                               | ...                              | 7           |
| Swerdlow 2005   | ★                                        | ★                                   | ★                         | ...                                                                      | ★                                                                            | ★                     | ★                                               | ★                                | 7           |
| Inoue 2006      | ★                                        | ★                                   | ★                         | ★                                                                        | ★                                                                            | ★                     | ★                                               | ★                                | 8           |
| Khan 2006       | ★                                        | ★                                   | ★                         | ★                                                                        | ★                                                                            | ★                     | ...                                             | ★                                | 7           |
| Hemminki 2010   | ★                                        | ★                                   | ★                         | ★                                                                        | ★                                                                            | ★                     | ★                                               | ...                              | 7           |
| Chodick 2010    | ★                                        | ★                                   | ★                         | ★                                                                        | ★                                                                            | ★                     | ...                                             | ★                                | 7           |
| Shu 2010        | ★                                        | ★                                   | ★                         | ★                                                                        | ★                                                                            | ★                     | ★                                               | ★                                | 8           |
| Wotton 2011     | ...                                      | ★                                   | ★                         | ★                                                                        | ★                                                                            | ★                     | ★                                               | ★                                | 7           |
| Johnson 2011    | ★                                        | ★                                   | ★                         | ★                                                                        | ★                                                                            | ★                     | ...                                             | ★                                | 7           |
| Lambe 2011      | ★                                        | ★                                   | ★                         | ★                                                                        | ★                                                                            | ★                     | ★                                               | ★                                | 8           |
| Gapstur 2012    | ★                                        | ★                                   | ★                         | ★                                                                        | ★                                                                            | ★                     | ...                                             | ★                                | 7           |
| Lo 2013         | ★                                        | ★                                   | ★                         | ★                                                                        | ★                                                                            | ★                     | ...                                             | ★                                | 7           |
| Chen 2014       | ★                                        | ★                                   | ★                         | ★                                                                        | ★★                                                                           | ★                     | ★                                               | ★                                | 9           |
| Hsu 2015        | ★                                        | ★                                   | ★                         | ★                                                                        | ★                                                                            | ★                     | ...                                             | ★                                | 7           |

|                                 |     |   |   |     |     |   |     |     |   |
|---------------------------------|-----|---|---|-----|-----|---|-----|-----|---|
| Harding 2015                    | ★   | ★ | ★ | ★   | ... | ★ | ★   | ★   | 7 |
| Dankner 2016                    | ★   | ★ | ★ | ★   | ★   | ★ | ★   | ★   | 8 |
| Carstensen 2016                 | ★   | ★ | ★ | ★   | ★   | ★ | ★   | ... | 7 |
| Fuchs 2017                      | ★   | ★ | ★ | ★   | ... | ★ | ★   | ★   | 7 |
| Ballotari 2017                  | ★   | ★ | ★ | ... | ★   | ★ | ★   | ... | 6 |
| He 2018                         | ★   | ★ | ★ | ★   | ★   | ★ | ... | ★   | 7 |
| Han 2018                        | ★   | ★ | ★ | ★   | ★   | ★ | ★   | ★   | 8 |
| Bao 2018                        | ... | ★ | ★ | ★   | ★   | ★ | ... | ★   | 6 |
| Saarela 2019                    | ★   | ★ | ★ | ★   | ... | ★ | ★   | ... | 6 |
| Linkeviciute-Ulinskiene<br>2019 | ★   | ★ | ★ | ★   | ... | ★ | ★   | ★   | 7 |
| Peng 2019                       | ★   | ★ | ★ | ★   | ★   | ★ | ... | ★   | 7 |
| Pace 2020                       | ★   | ★ | ★ | ★   | ★   | ★ | ★   | ... | 7 |

**Case-control studies**

| Study ID       | Is the case definition adequate | Representativeness of the cases | Selection of the controls | Definition of controls | Comparability of cases and controls on the basis of the design or analysis | Ascertainment of exposure | Same method of ascertainment for cases and controls | Non-response rate | Total stars |
|----------------|---------------------------------|---------------------------------|---------------------------|------------------------|----------------------------------------------------------------------------|---------------------------|-----------------------------------------------------|-------------------|-------------|
| O'Mara 1985    | ★                               | ★                               | ...                       | ★                      | ★                                                                          | ...                       | ★                                                   | ...               | 5           |
| Adler 1996     | ★                               | ★                               | ★                         | ...                    | ...                                                                        | ★                         | ★                                                   | ...               | 5           |
| Parazzini 1997 | ★                               | ★                               | ...                       | ★                      | ★                                                                          | ...                       | ★                                                   | ...               | 5           |
| Mori 1998      | ★                               | ★                               | ★                         | ★                      | ★                                                                          | ...                       | ★                                                   | ★                 | 7           |
| Kuriki 2007    | ★                               | ★                               | ★                         | ...                    | ...                                                                        | ★                         | ★                                                   | ★                 | 6           |
| Reis 2010      | ★                               | ★                               | ...                       | ★                      | ...                                                                        | ★                         | ★                                                   | ★                 | 6           |
| Attner 2012    | ★                               | ★                               | ★                         | ★                      | ★                                                                          | ★                         | ★                                                   | ...               | 7           |
| Bosetti 2012   | ★                               | ★                               | ...                       | ★                      | ★                                                                          | ...                       | ★                                                   | ...               | 5           |
| Ruiz 2016      | ★                               | ★                               | ...                       | ★                      | ★                                                                          | ...                       | ★                                                   | ...               | 5           |

One star is awarded if matched on, or adjusted for maternal age; another star is awarded if other confounders are taken into account.
